# Supplementary material for: Enhancing Nutrition and Antenatal Infection Treatment (ENAT) study: protocol of a pragmatic clinical effectiveness study to improve birth outcomes in Ethiopia
Source: PubMed Central journal article supplement (PMC8762145; doi:10.1136/bmjpo-2021-001327), 2022-01-13
Supplement: bmjpo-2021-001327.draft_revisions.pdf [file bmjpo-2021-001327.draft_revisions.pdf]

# BMJ Paediatrics Open

BMJ Paediatrics Open is committed to open peer review. As part of this commitment we make the peer review history of every article we publish publicly available.

When an article is published we post the peer reviewers' comments and the authors' responses online. We also post the versions of the paper that were used during peer review. These are the versions that the peer review comments apply to.

The versions of the paper that follow are the versions that were submitted during the peer review process. They are not the versions of record or the final published versions. They should not be cited or distributed as the published version of this manuscript.

BMJ Paediatrics Open is an open access journal and the full, final, typeset and author-corrected version of record of the manuscript is available on our site with no access controls, subscription charges or pay-per-view fees (<http://bmjpaedsopen.bmj.com>).

If you have any questions on BMJ Paediatrics Open's open peer review process please email [info.bmjpo@bmj.com](mailto:info.bmjpo@bmj.com)

# BMJ Paediatrics Open

## The Enhancing Nutrition and Antenatal Infection Treatment (ENAT) Study: Protocol of a pragmatic clinical effectiveness study to improve birth outcomes in Ethiopia

|                               |                                                                                                                                                                                                                                                                                                                                                                                                                                                                                                                                                                                                                                                                                                                                                                                                                                                                                                                                                                                                                                                                                                                                                                                                                                                                                                                                                                                                                                                                                                                                                                                                                                                                                                                                                                                                                                                                                                                                                                                                                                                                                                                                                                                                                          |
|-------------------------------|--------------------------------------------------------------------------------------------------------------------------------------------------------------------------------------------------------------------------------------------------------------------------------------------------------------------------------------------------------------------------------------------------------------------------------------------------------------------------------------------------------------------------------------------------------------------------------------------------------------------------------------------------------------------------------------------------------------------------------------------------------------------------------------------------------------------------------------------------------------------------------------------------------------------------------------------------------------------------------------------------------------------------------------------------------------------------------------------------------------------------------------------------------------------------------------------------------------------------------------------------------------------------------------------------------------------------------------------------------------------------------------------------------------------------------------------------------------------------------------------------------------------------------------------------------------------------------------------------------------------------------------------------------------------------------------------------------------------------------------------------------------------------------------------------------------------------------------------------------------------------------------------------------------------------------------------------------------------------------------------------------------------------------------------------------------------------------------------------------------------------------------------------------------------------------------------------------------------------|
| Journal:                      | <i>BMJ Paediatrics Open</i>                                                                                                                                                                                                                                                                                                                                                                                                                                                                                                                                                                                                                                                                                                                                                                                                                                                                                                                                                                                                                                                                                                                                                                                                                                                                                                                                                                                                                                                                                                                                                                                                                                                                                                                                                                                                                                                                                                                                                                                                                                                                                                                                                                                              |
| Manuscript ID                 | bmjpo-2021-001327                                                                                                                                                                                                                                                                                                                                                                                                                                                                                                                                                                                                                                                                                                                                                                                                                                                                                                                                                                                                                                                                                                                                                                                                                                                                                                                                                                                                                                                                                                                                                                                                                                                                                                                                                                                                                                                                                                                                                                                                                                                                                                                                                                                                        |
| Article Type:                 | Protocol                                                                                                                                                                                                                                                                                                                                                                                                                                                                                                                                                                                                                                                                                                                                                                                                                                                                                                                                                                                                                                                                                                                                                                                                                                                                                                                                                                                                                                                                                                                                                                                                                                                                                                                                                                                                                                                                                                                                                                                                                                                                                                                                                                                                                 |
| Date Submitted by the Author: | 21-Oct-2021                                                                                                                                                                                                                                                                                                                                                                                                                                                                                                                                                                                                                                                                                                                                                                                                                                                                                                                                                                                                                                                                                                                                                                                                                                                                                                                                                                                                                                                                                                                                                                                                                                                                                                                                                                                                                                                                                                                                                                                                                                                                                                                                                                                                              |
| Complete List of Authors:     | <p>Lee, Anne; Brigham and Women's Hospital, Pediatric Newborn Medicine; Harvard Medical School</p> <p>Abate, Firehiwot Workneh; Addis Continental Institute of Public Health</p> <p>Mullany, Luke C.; Johns Hopkins Bloomberg School of Public Health, Department of International Health</p> <p>Baye, Estifanos; Brigham and Women's Hospital, Department of Pediatric Newborn Medicine</p> <p>Berhane, Yoseph Yemane; Addis Continental Institute of Public Health</p> <p>Derebe, Mulatu Melese; Amhara Public Health Institute</p> <p>Eglovitch, Michelle; Brigham and Women's Hospital, Department of Pediatric Newborn Medicine</p> <p>Fasil, Nebiyou; Addis Continental Institute of Public Health</p> <p>Olson, Ingrid; Brigham and Women's Hospital, Department of Pediatric Newborn Medicine</p> <p>Kidane, Workagegnehu Tarekegn; Addis Continental Institute of Public Health</p> <p>Shiferw, Tigest; Addis Continental Institute of Public Health</p> <p>Shiferie, Fisseha; Addis Continental Institute of Public Health</p> <p>Tsegaye, Fitsum; Addis Continental Institute of Public Health</p> <p>Tsegaye, Sitota; Addis Continental Institute of Public Health</p> <p>Yibeltal, Kalkidan; Addis Continental Institute of Public Health</p> <p>Chan, Grace; Boston Children's Hospital, Harvard Medical School, Department of Medical Critical Care; Harvard TH Chan School of Public Health, Department of Epidemiology</p> <p>Christian, Parul; Johns Hopkins Bloomberg School of Public Health, Department of International Health</p> <p>Isanaka, Sheila; Harvard TH Chan School of Public Health, Departments of Nutrition and Global Health and Population</p> <p>Kang, Yunhee; Johns Hopkins Bloomberg School of Public Health, Department of International Health</p> <p>Lu, Chunling; Brigham and Women's Hospital, Division of Global Health Equity; Harvard Medical School, Department of Global Health and Social Medicine</p> <p>Molina, Rose ; Beth Israel Deaconess Medical Center</p> <p>Stojanov, Michele; Harvard Medical School, Department of Obstetrics and Gynecology</p> <p>Van Dyk, Fred; Johns Hopkins Bloomberg School of Public Health, Department of International Health</p> |

1  
2  
3  
4  
5  
6  
7  
8  
9  
10  
11  
12  
13  
14  
15  
16  
17  
18  
19  
20  
21  
22  
23  
24  
25  
26  
27  
28  
29  
30  
31  
32  
33  
34  
35  
36  
37  
38  
39  
40  
41  
42  
43  
44  
45  
46  
47  
48  
49  
50  
51  
52  
53  
54  
55  
56  
57  
58  
59  
60

|           |                                                                                                                                                                                                                                                                                                                                                                                                                       |
|-----------|-----------------------------------------------------------------------------------------------------------------------------------------------------------------------------------------------------------------------------------------------------------------------------------------------------------------------------------------------------------------------------------------------------------------------|
|           | Tadesse, Amare; Addis Continental Institute of Public Health; London School of Hygiene and Tropical Medicine, Department of Infectious Disease Epidemiology<br>Wylie, Blair; Harvard Medical School; Beth Israel Deaconess Medical Center, Department of Obstetrics and Gynecology<br>Worku, Alemayehu; Addis Continental Institute of Public Health<br>Berhane, Yemane; Addis Continental Institute of Public Health |
| Keywords: | Neonatology, Growth                                                                                                                                                                                                                                                                                                                                                                                                   |
|           |                                                                                                                                                                                                                                                                                                                                                                                                                       |

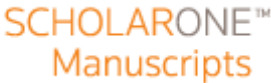

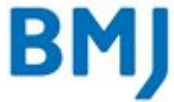

I, the Submitting Author has the right to grant and does grant on behalf of all authors of the Work (as defined in the below author licence), an exclusive licence and/or a non-exclusive licence for contributions from authors who are: i) UK Crown employees; ii) where BMJ has agreed a CC-BY licence shall apply, and/or iii) in accordance with the terms applicable for US Federal Government officers or employees acting as part of their official duties; on a worldwide, perpetual, irrevocable, royalty-free basis to BMJ Publishing Group Ltd ("BMJ") its licensees and where the relevant Journal is co-owned by BMJ to the co-owners of the Journal, to publish the Work in this journal and any other BMJ products and to exploit all rights, as set out in our [licence](#).

The Submitting Author accepts and understands that any supply made under these terms is made by BMJ to the Submitting Author unless you are acting as an employee on behalf of your employer or a postgraduate student of an affiliated institution which is paying any applicable article publishing charge ("APC") for Open Access articles. Where the Submitting Author wishes to make the Work available on an Open Access basis (and intends to pay the relevant APC), the terms of reuse of such Open Access shall be governed by a Creative Commons licence – details of these licences and which [Creative Commons](#) licence will apply to this Work are set out in our licence referred to above.

Other than as permitted in any relevant BMJ Author's Self Archiving Policies, I confirm this Work has not been accepted for publication elsewhere, is not being considered for publication elsewhere and does not duplicate material already published. I confirm all authors consent to publication of this Work and authorise the granting of this licence.

1  
2  
3 **The Enhancing Nutrition and Antenatal Infection Treatment (ENAT) Study:**  
4 **Protocol of a pragmatic clinical effectiveness study to improve birth outcomes in**  
5 **Ethiopia**  
6  
7

8  
9 Anne CC Lee<sup>1,2\*</sup>, Firehiwot Workneh Abate<sup>3</sup>, Luke C. Mullany<sup>4</sup>, Estifanos Baye<sup>1</sup>, Yoseph  
10 Yemane Berhane<sup>3</sup>, Mulatu Melese Derebe<sup>5</sup>, Michelle Eglovitch<sup>1</sup>, Nebiyou Fasil<sup>3</sup>, Ingrid E Olson<sup>1</sup>,  
11 Workagegnehu Tarekegn Kidane<sup>3</sup>, Tigest Shiferw<sup>3</sup>, Fisseha Shiferie<sup>3</sup>, Fitsum Tsegaye<sup>3</sup>, Sitota  
12 Tsegaye<sup>3</sup>, Kalkidan Yibeltal<sup>3</sup>, Grace J. Chan<sup>2,6,7</sup>, Parul Christian<sup>4</sup>, Sheila Isanaka<sup>8</sup>, Yunhee  
13 Kang<sup>4</sup>, Chunling Lu<sup>2,9</sup>, Rose L. Molina<sup>2,10</sup>, Michele D. Stojanov<sup>10</sup>, Fred Van Dyk<sup>4</sup>, Amare Worku  
14 Tadesse<sup>3,11</sup>, Blair J. Wylie<sup>2,9</sup>, Alemayehu Worku<sup>3</sup>, Yemane Berhane<sup>3</sup>  
15

16 <sup>1</sup>Department of Pediatric Newborn Medicine, Brigham and Women's Hospital, Boston, MA, USA

17 <sup>2</sup>Harvard Medical School, Boston, Massachusetts, USA

18 <sup>3</sup>Addis Continental Institute of Public Health, Addis Ababa, Ethiopia

19 <sup>4</sup> Department of International Health, Johns Hopkins Bloomberg School of Public Health,  
20 Baltimore, MD, USA.

21 <sup>5</sup>Amhara Public Health Institute, Bahir Dar, Ethiopia

22 <sup>6</sup>Department of Epidemiology, Harvard T.H. Chan School of Public Health, Boston, MA, USA

23 <sup>7</sup> Department of Medical Critical Care, Boston Children's Hospital, Harvard Medical School,  
24 Boston, Massachusetts, USA

25 <sup>8</sup>Departments of Nutrition and Global Health and Population, Harvard T.H. Chan School of  
26 Public Health, Boston, MA, USA

27 <sup>9</sup> Division of Global Health Equity, Brigham and Women's Hospital, Boston, Massachusetts,  
28 USA

29 <sup>10</sup>Department of Obstetrics and Gynecology, Beth Israel Deaconess Medical Center, Harvard  
30 Medical School, Boston, MA, USA

31 <sup>11</sup>Department of Infectious Disease Epidemiology, London School of Hygiene and Tropical  
32 Medicine, London, UK  
33  
34  
35  
36  
37

38 Corresponding Author:

39 Anne CC Lee

40 75 Francis St, Boston MA 012115

41 617-732-8343

42 Alee6@bwh.harvard.edu  
43

44 Word Count: 4264  
45  
46  
47  
48  
49  
50  
51  
52  
53  
54  
55  
56  
57  
58  
59  
60

## ABSTRACT

**Introduction:** The WHO Nutrition Target aims to reduce the global prevalence of low birth weight 30% by 2025. The Enhancing Nutrition and Antenatal Infection Treatment (ENAT) study will test the impact of packages of pregnancy interventions to enhance maternal nutrition and infection management on birth outcomes in rural Ethiopia.

**Methods and analysis:** ENAT is a pragmatic, open-label, 2x2 factorial, randomised clinical effectiveness study implemented in 12 rural health centers in Amhara, Ethiopia. Eligible pregnant women presenting at antenatal care (ANC) visits at <24 weeks gestation are enrolled (n=2400). ANC quality is strengthened across all centers. Health centers are randomised to receive an enhanced nutrition package (ENP) or standard nutrition care, and within each health center, individual women are randomised to receive an enhanced infection management package (EIMP) or standard infection care. At ENP centers, women receive a regular supply of adequately iodized salt and iron-folate (IFA), enhanced nutrition counseling, and those with mid-upper arm circumference <23 cm receive a micronutrient fortified balanced energy protein supplement (corn soya blend) until delivery. In standard nutrition centers, women receive routine counseling and IFA. EIMP women have additional screening/treatment for urinary and sexual/reproductive tract infections and intensive deworming. Non-EIMP women are managed syndromically per Ministry of Health Guidelines. Participants are followed until 1 month postpartum, and a subset until 6 months. The primary study outcomes are newborn weight and length measured at <72 hours of age. Secondary outcomes include preterm birth, low birthweight, and stillbirth rates; newborn head circumference; infant weight and length for age z-scores at birth; maternal anemia; and weight gain during pregnancy.

**Ethics and dissemination:** ENAT is approved by the Institutional Review Boards of Addis Continental Institute of Public Health (001-A1-2019) and Mass General Brigham (2018P002479). Results will be disseminated to local and international stakeholders.

**ISRCTN Registration:** 15116516

**Funding:** Bill & Melinda Gates Foundation

**Protocol:** Version 4.0 (August 2021)

## Article Summary

What is known about the subject:

- In low- and middle-income countries, maternal undernutrition is prevalent and a major risk factor for adverse birth outcomes, including spontaneous preterm birth, low birth weight and small for gestational age infants.
- Maternal infections in pregnancy are also common, yet under-recognized risk factors for preterm birth and poor fetal growth in low- and middle-income countries.
- Beyond their independent effects, maternal infections and nutritional status may have synergistic effects on fetal growth and gestational length.

What this study hopes to add:

- The ENAT study will increase the evidence-base on the role of antenatal infection management and targeted, fortified balanced energy protein supplementation on maternal and birth outcomes.
- ENAT intervention packages were co-designed with local stakeholders and are implemented within existing health systems; this approach will maximize potential uptake, scalability, impact and cost-effectiveness.
- The factorial study design allows testing of the individual and combined effects of nutrition and infection management packages on birth outcomes.

## INTRODUCTION

The World Health Organization (WHO) Third Global Nutrition Target aims to reduce the proportion of babies born low birthweight (LBW, <2500 grams) by 30% by the year 2025[1]. Approximately 20.5 million infants were born LBW in 2015, with 91% from low-middle income countries (LMIC) and 24% in Sub-Saharan Africa [2]. The main etiologies of low birthweight are preterm birth (<37 gestational weeks) and fetal growth restriction, commonly classified as small-for-gestational-age (SGA) at birth. Preterm and SGA infants carry increased risk of mortality, morbidity, childhood stunting, neurodevelopmental impairment, and adult chronic disease [3–7]. Prevention of preterm birth and SGA is a key public health strategy to improve child survival and health in LMICs.

In LMICs, maternal undernutrition is prevalent and a major risk factor for adverse birth outcomes, including spontaneous preterm birth, LBW and SGA [8,9]. Interventions to improve maternal nutritional status in pregnancy, including iron-folate [10], multiple-micronutrients [11], and balanced protein-energy (BEP) supplementation [12,13], have been individually tested and found to be effective in increasing mean birthweight. However, lower than expected benefit has been observed with the individual nutritional interventions [10,12–14]. Greater effect sizes are noted in undernourished women, and there is a need for additional studies with standardized supplementation criteria as well as the combination of BEP and micronutrient supplementation [12,13].

Maternal infections in pregnancy are also common, yet under-recognized risk factors for preterm birth and poor fetal growth in LMICs. Urinary tract infection or asymptomatic bacteriuria may affect 9-80% of pregnancies in sub-Saharan Africa [15] and are associated with a 2-fold elevated risk of preterm delivery [16]. Helminthic infections are prevalent and associated with systemic inflammation, LBW and preterm birth [17–19]. Genital tract infections may ascend the reproductive tract and lead to infection and inflammation in the amniotic fluid, predisposing to preterm birth [20]. In LMICs, screening and treatment of genitourinary tract infections during routine antenatal care (ANC) is infrequent due to lack of resources and capacity for laboratory testing. While epidemiologic data has consistently established associations between prenatal infections and adverse pregnancy outcomes, there is limited evidence on the effectiveness of prenatal interventions to screen and treat infections to prevent LBW in LMICs.



Beyond their independent effects, maternal infections and nutritional status may have synergistic effects on fetal growth and gestational length [21–25]. Figure 1 depicts several pathways linking maternal nutrition and infections in pregnancy. This framework provides the basis for the hypothesis that targeting both risk factors in pregnancy may lead to more substantial, and potentially synergistic, improvements in fetal growth and pregnancy length [26].

This manuscript details the study protocol for the Enhancing Nutrition and Antenatal Infection Treatment (ENAT) study in Amhara region, Ethiopia. In 2016, WHO released recommendations on an evidence-based, core package of ANC to optimize the pregnancy experience and outcomes [27], include guidelines on nutrition and infection management in pregnancy (Web Table 1). In Ethiopia, not all recommendations have been adopted or achieved high level of coverage or quality in ANC. The primary aim of the ENAT study is to determine the impact of WHO-recommended ANC interventions to optimize maternal nutrition and manage maternal pregnancy infections on infant birth size in Amhara, Ethiopia. We hypothesize that the nutrition and infection management packages will independently increase newborn birth weight and length, and that the combined effect of both packages will be greater than either alone.

## **METHODS AND ANALYSIS**

### **Study Design**

The ENAT study is a 2x2 factorial pragmatic, open-label, randomised clinical effectiveness study with cluster randomisation of the enhanced nutrition package (ENP) versus standard care (non-ENP), and individual level randomisation of an enhanced infection management package (EIMP) versus standard care (non-EIMP) (Figure 2).

### **Study Setting**

The ENAT study site was established in 2018 as a partnership with the Addis Continental Institute of Public Health (ACIPH), Amhara Regional Health Bureau, Amhara Public Health Institute and Brigham and Women's Hospital. The Amhara region has low-resourced health systems and poor health indicators. As per the 2016 Ethiopian Demographic Health Services (EDHS) data, Amhara had the country's highest rates of neonatal mortality (47 per 1000 live births) and LBW (22.2%), and high maternal mortality rate (412 per 100,000 live births) [28].

1  
2  
3 Rates of any prenatal care and institutional delivery and were 82.6% and 54.2%, respectively  
4 [29]. One in four women of reproductive age are underweight (body mass index < 18.5 kg/m<sup>2</sup>)  
5 [28] and geohelminth infections are prevalent, ranging from 21.1-43.5% [30,31].  
6  
7  
8  
9

10 The ENAT study is conducted in 12 rural health centers (each serving ~25,000 population) in  
11 West Gojjam (South and North Achefer districts [woredas]) and South Gondar (Dera and  
12 Libokemem districts) zones, Amhara (Figure 3, Site Map). The districts were chosen in  
13 collaboration with the Amhara Regional Health Bureau based on the high rates of  
14 undernutrition, risk of low birth weight, need for nutritional programs, and proximity to the  
15 regional laboratory. The study health centers were chosen based on accessibility, total ANC  
16 volume (minimum 250 women presenting to ANC/year), and infrastructure (functional  
17 laboratory).  
18  
19  
20  
21  
22  
23

#### 24 **Patient and public involvement**

25 Prior to the study, formative work was conducted with a range of community members (mothers,  
26 families, community and religious leaders, health providers) [32]. This feedback directly  
27 informed the design of the study interventions, packages, and their implementation. Community  
28 sensitization was performed prior to initiating the study.  
29  
30  
31  
32  
33

#### 34 **Study participants and recruitment**

35 Pregnant women are recruited from ANC visits in designated ENAT study health centers. A  
36 study nurse explains study procedures and obtains written informed consent. For illiterate  
37 women, an impartial witness attests to consent and the woman provides a thumbprint.  
38  
39  
40

41 To encourage early presentation at ANC clinics, community sensitization was conducted prior to  
42 study initiation. Study field data collectors and community cadres disseminated information  
43 about the ENAT study at monthly community-based pregnant women's conferences, and  
44 community and religious gatherings and encouraged presentation to the health centers if/as  
45 soon as pregnancy was suspected.  
46  
47  
48  
49

#### 50 *Inclusion criteria:*

- 51 • ≤24 weeks gestation based on a clinical algorithm (LMP and/or symphysis fundal height)  
52 who have a viable pregnancy  
53

#### 54 *Exclusion criteria:*

- 55 • Pregnant women presenting for first ANC >24 weeks  
56  
57  
58  
59  
60

- Pregnant women who live >2 hours walking distance from ENAT health centers
- Pregnant women presenting at first ANC with fetus that is non-viable (without a heartbeat on enrollment ultrasound)

### ENAT Study Interventions

Health systems strengthening of ANC services was performed in ENAT health centers prior to the study to benefit all women receiving care in these facilities. Health systems strengthening was conducted in partnership with Amhara Regional Health Bureau and local partners including Jhpiego. Staff were trained in ANC standards, guidelines, and measurements (blood pressure, gestational age, birth weight [33]). Facilities were stocked with basic equipment, medications, and diagnostic testing. Laboratory capacity was augmented and all health centers were equipped with ultrasound machines.

#### A. Enhanced Nutrition Package (ENP) (Table 1)

**Table 1: Enhanced Nutrition Package Components**

| ENP Content                        | Activity                                                                                                                                        | Frequency                                                                                                          |
|------------------------------------|-------------------------------------------------------------------------------------------------------------------------------------------------|--------------------------------------------------------------------------------------------------------------------|
| Nutritional education/counseling   | Counseling about healthy eating, adequate pregnancy weight gain, increasing protein and energy in diet, importance of Iron/folate, iodized salt | Every ANC visit (monthly, potentially less frequently pending COVID)                                               |
| Iron-Folic Acid                    | Strengthen counseling, supply and reinforcement of daily IFA (60 mg Fe/400 µg folic acid)                                                       | Provide 90-day supply per FMOH, adherence/counseling at every ANC visit                                            |
| Iodized salt                       | For all pregnant women, provide up to 1kg at enrollment and follow up visit for household use during pregnancy with counseling                  | Provided adequately iodized salt at enrollment, and monthly follow up visits; adherence/counseling every ANC visit |
| Balanced Energy Protein supplement | For pregnant women with MUAC <23 cm, local Corn Soya Blend 200 gm daily supplement (784 kcal/day, 28 g protein)                                 | Daily supplement, distributed at ANC visits (monthly, given COVID may provide longer term supply)                  |

##### *A.1 Nutritional Education/Counseling on Adequate Pregnancy Nutrition and Weight Gain:*

Routine ANC nutrition counseling includes increasing intake and dietary diversity, however can vary depending on patient load. For ENP centers, supplementary, locally-contextualized, counseling was developed based on our formative work[32], and is delivered by midwives. Content includes BMI-based recommended weight gain, dietary diversity, and educational messages developed to address local cultural beliefs related to dietary intake during pregnancy as well as side effects of iron-folate. Nutrition education materials, including posters and videos,

1  
2  
3 are shown in ENP health centers to promote women's behavior change and maximize their  
4 exposure to various but consistent nutrition messages.  
5  
6

7  
8 *A.2 Iron Folic Acid (IFA):* The Ethiopian FMOH recommends 60 mg iron plus 400 µg folic acid  
9 supplements, orally once daily in pregnancy. In August-Sept 2019, coverage of IFA was 46.3%  
10 in the ENAT health centers, and our formative work indicated that barriers included local beliefs  
11 about "big babies" and side effects such as constipation. In the ENP health centers, additional  
12 counseling is conducted, utilizing video/media to address common cultural beliefs and side  
13 effects, and women are reminded at each ANC visit about IFA consumption, management of  
14 side effects and provided refills per FMOH guidelines.  
15  
16  
17  
18

19  
20 *A.3 Provision of Adequately Iodized Household Salt:* In ENP centers, we provide a monthly  
21 household supply of high-quality adequately iodized salt at every ANC visit. The iodized salt  
22 (Waff Manufacturing, 30-40 ppm potassium iodate, 600 gm bottle) is packaged in airtight,  
23 resealable, polyethylene containers, to allow resealing after use and to reduce risk of  
24 evaporative losses at the household level. Quality control procedures are in place to ensure that  
25 iodization is in the proper range at production and maintained at distribution sites. Women are  
26 counselled that salt should be used to replace their household salt, on the approximate daily  
27 use (~10 gm (3 pinches)/day), the proper storage of salt (away from light, heat, humidity, re-  
28 capping container after use) and use of salt only after cooking/heating of food.  
29  
30  
31  
32  
33  
34  
35

36 *A.4 Fortified Balanced Energy Protein (BEP) Supplement for Malnourished Women (MUAC <23*  
37 *cm):* In the ENP health centers, women who have MUAC <23 cm at enrollment, or at any follow  
38 up ANC visit, are provided with a monthly supply of locally produced micronutrient fortified corn  
39 soya flour blend (Super Cereal, Faffa Food Share Company, Addis Ababa, Ethiopia) at every  
40 ANC visit until delivery. The daily corn soya blend (CSB) supplement (200gm) is provided in  
41 addition to normal meals and contains 28 g of protein and 784 kcal (Web Table 2). This protein  
42 composition falls within recommendations that a BEP supplement provide ~50% of the  
43 additional protein requirement in the 3<sup>rd</sup> trimester (range of 28-36g for malnourished  
44 populations) [34]. Micronutrient composition of the provided BEP is also shown in Web Table 2.  
45 The fortified BEP supplement meets the IOM recommended levels in pregnancy [35] for  
46 Vitamins A, D, E, B<sub>2</sub>, B<sub>3</sub>, B<sub>6</sub>, B<sub>12</sub>, C, calcium and phosphorus (see Web Table 2). 35 sachets  
47 (200 gm each) are distributed to women at enrollment and at follow up monthly ANC visits to  
48  
49  
50  
51  
52  
53  
54  
55  
56  
57  
58  
59  
60

allow for additional doses in case she is delayed in returning for ANC and/or for potential family sharing practices.

## B. Enhanced Infection Management Package (EIMP) (Table 2)

Women randomised to the EIMP intervention, receive the following interventions at their first ANC visit >12 weeks.

**B.1 Urinary Tract Infection/Asymptomatic Bacteriuria:** A clean catch midstream urine specimen is collected using a vacutainer with boric acid preservative (Beckton Dickinson). Urine culture and antibiotic susceptibility testing are performed at Amhara Public Health Institute (APHI), the regional laboratory certified by the ENAO (Ethiopian National Accreditation Office) - ISO (International Organization for Standardization) 15189. Antibiotic susceptibility is determined including the Vitek method (bioMerieux, Marcy l'Etoile, France), or Kirby Bauer Disk Diffusion. Urinary tract infections (UTI) are classified in Web Table 3 and treated with an oral antibiotic based on antibiotic sensitivity patterns (Web Table 4). Antibiotics are provided to pregnant women at no cost and the first dose is directly observed. Women with severe illness or difficult to treat infections are referred to the obstetrics department at Feligot Hiwot hospital. Women provide a test of cure specimens at the following ANC visit.

**Table 2. ENAT EIMP Components**

| Infection                                          | ENAT Enhanced Infection Management Package (EIMP) Activity                                                                                                                                                                                                                                                                             |
|----------------------------------------------------|----------------------------------------------------------------------------------------------------------------------------------------------------------------------------------------------------------------------------------------------------------------------------------------------------------------------------------------|
| Urinary Tract Infection/Asymptomatic Bacteriuria   | <i>Screen:</i> Urine culture and antibiotic sensitivity.<br><i>Treat:</i> Initially per clinical protocol, with targeted antibiotic treatment based on antibiotic resistance patterns.                                                                                                                                                 |
| Sexually Transmitted/Reproductive Tract Infections | <i>Screen:</i><br>1) <b>ALL pregnant women</b> for gonorrhoea, chlamydia using accurate rapid diagnostic testing for chlamydia and gonorrhoea<br>2) Pregnant women <b>with symptoms</b> are screened for trichomonas and bacterial vaginosis<br><i>Treat:</i> All positive cases and partners (for gonorrhoea, chlamydia, trichomonas) |
| Geo-helminths                                      | Presumptive deworming with mebendazole 500 mg or albendazole 400 mg as per FMOH guideline; Stool screen and treatment for parasitic infections at least 4 weeks after deworming. If positive, treatment for intestinal parasites per FMOH guidelines.                                                                                  |

1  
2  
3 *B.2 Sexually Transmitted/Reproductive Tract Infections:* Women self-collect vaginal  
4 specimens that are tested for gonorrhea and chlamydia using the *Xpert® CT/NG assay*  
5 (*Cepheid, Sunnyvale, CA*), a modular cartridge-based platform for testing each specimen by  
6 nucleic acid amplification at APHI. Chlamydia is treated with Azithromycin 1 gram orally  
7 once and gonorrhea is treated with Ceftriaxone 250 mg IM once + Azithromycin 1gram  
8 orally once. Partner treatment is on a voluntary basis with a regimen as recommended by  
9 the Ethiopian STI management guidelines [36]. A test of cure is obtained at the next ANC  
10 visit.  
11  
12  
13  
14  
15  
16

17 For women who report symptoms of abnormal vaginal discharge, vulvar symptoms, or lower  
18 abdominal tenderness, additional vaginal swabs are collected for trichomonas and bacterial  
19 vaginosis by point of care diagnostics. Trichomonas is tested using the OSOM® trichomonas  
20 rapid test (Sekisui Diagnostics, Lexington, MA). Bacterial vaginosis is tested using  
21 Diagnosit® BVBLUE® test (Gryphus Diagnostics, Knoxville, TN)). Trichomonas is treated with  
22 Metronidazole 2 grams orally once, and partners are treated. Bacterial vaginosis is treated with  
23 metronidazole 500 mg twice daily for 7 days.  
24  
25  
26  
27  
28  
29

30 *B.3. Parasitic Intestinal Infections:* In settings of high geo-helminth burden, WHO  
31 recommends prophylactic deworming in 2nd and 3rd trimester of pregnancy [37]. At study  
32 initiation, mebendazole (500 mg) was provided twice in pregnancy consistent with WHO  
33 guidelines. Due to health provider concerns regarding medication package insert  
34 information contraindicating use in early pregnancy, in September 2020, the protocol was  
35 modified to a single presumptive deworming in the 3rd trimester. With the adoption of new  
36 Ethiopian FMOH ANC guidelines allowing earlier provision of anti-helminthics in pregnancy,  
37 in May 2021, the ENAT protocol was modified to provide presumptive deworming in the 2nd  
38 trimester followed by a stool screening and treatment at least 4 weeks later. In the first post-  
39 deworming visit, stool is screened for intestinal parasites in the health center lab using wet  
40 mount microscopy available at the health center. Women identified with parasitic infections  
41 are treated as per FMOH recommendations (Web Table 4).  
42  
43  
44  
45  
46  
47  
48  
49  
50

### 51 **Randomisation/Allocation**

52 At the first level of randomisation, clusters (i.e., health centers) are randomised into one of  
53 two nutrition interventions: a) ENP or b) standard nutrition care. We performed a  
54 constrained randomisation to ensure balance across the two arms of the study for key  
55  
56  
57  
58  
59  
60



1  
2  
3 indicators including: population size, pre-study ANC coverage rates, number of births, and  
4 travel time to the regional center of Bahir Dar. We: 1) set reasonable tolerance levels for the  
5 restriction variables, 2) created all possible random sequences, where each sequence  
6 allocated 6 health centers to the ENAT Nutrition Package and 6 health centers to routine  
7 care, 3) assessed each sequence as to whether or not it met these restriction criteria, and  
8 4) choose randomly from the subset of all such allocation sequences that met the criteria. At  
9 the second level of randomisation, we randomised individual pregnant women presenting  
10 for ANC at each health center to receive a) *ENAT Enhanced Infection Management*  
11 *Package (EIMP)*, or b) standard infection care (Figure 2). Each health center received a  
12 pre-generated randomisation list of sequential individual assignments to EIMP or standard  
13 care, where assignments were equally allocated to each arm within randomly permuted  
14 blocks of size 4, 8, or 12. The randomisation lists were generated separately, by health  
15 center, using a script written by one of the authors (LCM) in R [38].  
16  
17  
18  
19  
20  
21  
22  
23  
24

### Outcome Measures

The **primary outcomes** are

- P1. Newborn weight measured within 72 hours of birth
- P2. Newborn length measured within 72 hours of birth

The **secondary outcomes** include:

- S1. Length of gestation, with gestational age determined by <24-week pregnancy ultrasonography
- S2. Proportion of pregnancies resulting in spontaneous preterm delivery
- S3. Proportion of newborns born of low birthweight (<2500 grams), as measured within 72 hours of life
- S4. Proportion of newborns born small-for-gestational age, as defined by the INTERGROWTH 21st neonatal birth weight standard.
- S5. Stillbirth rate
- S6. Newborn head circumference within 72 hours of birth
- S7. Infant Z-scores for weight-for-age, length-for-age, head circumference-for-age within 72 hours of birth
- S8. Maternal gestational weight gain
- S9. Maternal anemia (3rd trimester)

The definitions used for each outcome measure is shown in Table 3.

Table 3: ENAT Study Outcomes

| Primary outcomes                                                           |                                                                                                                                                                                                                                                                                                                                                                                                                                                                                                         |
|----------------------------------------------------------------------------|---------------------------------------------------------------------------------------------------------------------------------------------------------------------------------------------------------------------------------------------------------------------------------------------------------------------------------------------------------------------------------------------------------------------------------------------------------------------------------------------------------|
| <b>P1. Newborn weight &lt;72 hours of birth</b>                            | Weight of the unclothed infant measured at <72 hours of life                                                                                                                                                                                                                                                                                                                                                                                                                                            |
| <b>P2. Newborn length measured at birth</b>                                | Infant Length measured at <72 hours of life                                                                                                                                                                                                                                                                                                                                                                                                                                                             |
| Secondary outcomes                                                         |                                                                                                                                                                                                                                                                                                                                                                                                                                                                                                         |
| <b>S1. Gestational age</b>                                                 | Gestational age determined by enrollment ultrasound, CRL used if <95 mm (Intergrowth 21st), then BPD/FL (WHO Kiserud) used if CRL>95 mm or missing                                                                                                                                                                                                                                                                                                                                                      |
| <b>S2a. Proportion of pregnancies resulting in preterm delivery</b>        | <p>This measure is defined as the spontaneous termination of pregnancy from 24 to &lt;37 weeks resulting in: 1) preterm live birth, 2) fetal loss (spontaneous pregnancy loss 24 to &lt;37 weeks) that is not due to induced abortion.</p> <p>Numerator</p> <ul style="list-style-type: none"> <li>• Live births (28-&lt;37weeks)</li> <li>• Stillbirth (28-&lt;37 weeks)</li> <li>• Late Miscarriage (24-&lt;28 weeks)</li> </ul> <p>Denominator<br/>All birth outcomes <math>\geq 24</math> weeks</p> |
| <b>S2b. Preterm birth</b>                                                  | <p>Numerator: Live births &lt;37 weeks of gestation</p> <p>Denominator: Livebirths</p>                                                                                                                                                                                                                                                                                                                                                                                                                  |
| <b>S3. Small for Gestational Age<sup>a</sup> (Intergrowth)</b>             | <10% birthweight for GA by sex compared to Intergrowth reference <sup>2</sup>                                                                                                                                                                                                                                                                                                                                                                                                                           |
| <b>S4. Low birthweight rate</b>                                            | Low birthweight is defined as birthweight (measured within the first 72 h of life) of <2500 g. We will also assess the outcome of birthweight <2000 g.                                                                                                                                                                                                                                                                                                                                                  |
| <b>S5. Stillbirth rate</b>                                                 | <p>Numerator: Stillbirth (<math>\geq 28</math> weeks gestation)- fetal death with no signs of life<br/><i>A preterm stillbirth is defined as an infant born without signs of life (no spontaneous crying, breathing, and/or movement) at 28 to &lt;37 weeks gestation.</i><br/><i>A term stillbirth is defined as an infant born without signs of life at <math>\geq 37</math> wks</i></p> <p>Denominator: All live births and stillbirths <math>\geq 28</math> weeks</p>                               |
| <b>S6. Newborn head circumference</b>                                      | Head circumference of the infant measured at <72 hours of age                                                                                                                                                                                                                                                                                                                                                                                                                                           |
| <b>S7. Newborn weight, length, and head circumference for age Z-scores</b> | Infant weight, length, and head circumference for age z-scores measured at <72 hours of life, calculated using the Intergrowth reference for size at birth.                                                                                                                                                                                                                                                                                                                                             |
| <b>S8. Rate of weight gain in pregnancy</b>                                | Maternal weight gain (kg) per week gestation in the 2nd and 3rd trimester                                                                                                                                                                                                                                                                                                                                                                                                                               |
| <b>S9. Maternal anemia</b>                                                 | Mean hemoglobin concentration in 3 <sup>rd</sup> trimester (Mission hemoglobinometer)                                                                                                                                                                                                                                                                                                                                                                                                                   |

<sup>a</sup>Abbreviations: WHO, World Health Organization; UTI, urinary tract infection; ANC, antenatal care; SGA, small-for-gestational-age; GA, gestational age



### Data Collection

The timeline of individual participant study visits, measurements and data collection are shown in Table 4. All study visits are conducted at the health center, with the exception of the birth visit that may be conducted at home within 72 hours of delivery, for births occurring at home or outside of the study area. Adherence monitoring visits also occur at the home for those participants who do not return to the health center for follow up.

The core of the data collection system is the Survey Solutions platform (World Bank, v20.08, 2021). Study nurses enter data directly into electronic tablets with programmed validity checks during study visits. Paper forms are used if tablets are temporarily unavailable. The tablets are regularly synchronized to the server on the ACIPH campus. A web-based dashboard supports data collectors, supervisors, and investigators in real time management and monitoring of study activities.

Table 4. Participant timeline schedule of enrolment, interventions, assessment, and visits

|                                      |                        | STUDY PERIOD    |          |      |      |           |         |
|--------------------------------------|------------------------|-----------------|----------|------|------|-----------|---------|
|                                      |                        | Post-allocation |          |      |      |           |         |
|                                      |                        | Allocation      | Prenatal |      |      | Postnatal |         |
| TIMEPOINT                            | Enrolment<br><24 weeks | ANC1            | ANC2     | ANC3 | etc. | Birth     | 1 month |
| <b>ENROLMENT:</b>                    |                        |                 |          |      |      |           |         |
| Eligibility screen                   | X                      |                 |          |      |      |           |         |
| Informed consent                     | X                      |                 |          |      |      |           |         |
| Allocation                           | X                      |                 |          |      |      |           |         |
| <b>INTERVENTIONS:</b>                |                        |                 |          |      |      |           |         |
| ENP                                  | X                      | X               | X        | X    | X    |           |         |
| EIMP                                 | X                      | X               | X        | X    | X    |           |         |
| ENP + EIMP                           | X                      | X               | X        | X    | X    |           |         |
| <b>ASSESSMENTS:</b>                  |                        |                 |          |      |      |           |         |
| <b>MOTHERS</b>                       |                        |                 |          |      |      |           |         |
| US (fetal growth & GA determination) | X                      |                 |          | X    |      |           |         |
| Basic medical & obstetric history    | X                      |                 |          |      |      |           |         |
| Socioeconomic status                 | X                      |                 |          |      |      |           |         |
| Health care costs                    | X                      |                 | X        |      |      |           |         |
| Food insecurity and Dietary Intake   | X                      | X               |          | X    |      |           |         |
| Maternal stress and depression       |                        | X               |          | X    |      |           | X       |
| Maternal anthropometrics             | X                      | X               | X        | X    | etc. | X         | X       |
| Maternal morbidity                   | X                      | X               | X        | X    | etc. | X         | X       |
| Labor and Delivery characteristics   |                        |                 |          |      |      | X         |         |
| Assessment of home environment       |                        |                 |          |      |      | X         |         |
| <b>INFANTS</b>                       |                        |                 |          |      |      |           |         |
| Anthropometrics                      |                        |                 |          |      |      | X         | X       |
| Breast feeding practices             |                        |                 |          |      |      | X         | X       |
| Morbidity and mortality              |                        |                 |          |      |      | X         | X       |

### *Enrollment Visit*

At the enrollment visit at the health center, data is collected on the participant's socio-economic status, basic medical and obstetric history, pregnancy history, maternal morbidity including COVID-19, food security, and dietary intake. A dietary quality questionnaire is administered, which has been used in the Ethiopian context [39].

A basic abdominal obstetric ultrasound is performed by a trained research nurse at the enrollment visit for pregnancy dating. An intensive ultrasonography training and standardization was performed by General Electric, Ethiopian Radiography Association and sonographers from Beth Israel Deaconess Hospital (Boston, MA). Sonographers measure crown-rump length, bi-parietal diameter (outer to inner), head circumference, femoral length, abdominal circumference in duplicate. Approximately 10% of images are externally reviewed (MS, BJW) for quality control.

Maternal and infant anthropometrics are measured by research staff (nurses, data collectors) at baseline and follow up visits (Table 3). Maternal weight is measured with a digital scale (ADE M317600, Germany; precision 100 gm) and height is measured using an adult stadiometer (Shorr Productions HeightLite). All measurements are performed twice, with a third measurement done if the difference is greater than the minimal acceptable difference defined by Intergrowth 21 [40]. Nurses and data collectors are trained and standardized in anthropometric measurements at the start of the study and every 6 months.

### *Follow up ANC Visits*

During the follow up ANC visits at the health center, research staff interview women about their health status, morbidity, pregnancy history/complications, counselling/services received, maternal mental health screen, and dietary intake. Data is abstracted from routine ANC records, including blood pressure, lab testing results, and management. Maternal weight and mid-upper arm circumference are measured. In a subset of women, a semi-quantitative food frequency questionnaire for ~70 food items is administered at ANC visits. Hemoglobin is measured during enrollment in the 1st or 2<sup>nd</sup> and 3<sup>rd</sup> trimester ANC visits (Hemocue 301c). Venous hemoglobin is measured if blood is already being drawn for other purposes, and otherwise capillary hemoglobin is measured.

1  
2  
3 Adherence to each nutritional supplement is assessed at every ANC visit. The participant is  
4 asked to bring the used IFA bottle, salt container, and BEP sachets back to the health  
5 center at each ANC visit. Pill or empty sachet count is done, and the salt container weighed.  
6 The participant is also asked to recall the number of sachets and/or pills that were taken in  
7 the last 7 days, and since the last visit. For mothers who do not attend scheduled ANC  
8 visits, a home visit is made by a data collector to assess adherence and conduct pill/sachet  
9 counts and remind the mother to return for ANC and study visits.  
10  
11  
12  
13  
14  
15

16 A repeat ultrasound is performed in the 3<sup>rd</sup> trimester to monitor fetal growth and assess the  
17 position of the baby. If the fetus is determined to be in non-vertex positioning at the 3<sup>rd</sup>  
18 trimester scan, the nurse recommends that the women deliver in the nearest hospital with  
19 Cesarean section capacity.  
20  
21  
22

### 23 *Birth Visit*

24 Participants who deliver in health facilities are assessed by research staff based in health  
25 centers or hospitals as soon as possible after birth, but within 72 hours of life. Data is gathered  
26 from women and from chart review about the delivery and immediate postpartum period.  
27 Medical records are reviewed for intrapartum course (e.g., vital signs, duration of labor), delivery  
28 complications, and maternal/neonatal morbidity. For deliveries that occur at home, a home visit  
29 is made by research staff as soon as possible upon birth notification (within 72 hours). Maternal  
30 history is obtained per self-report regarding delivery history/complications, and postpartum  
31 maternal/neonatal morbidity.  
32  
33  
34  
35  
36  
37  
38

39 Infant weight is measured using a high quality, precise digital infant scale (ADE M112600,  
40 Germany; precision 5 gm). Infant length is measured using a portable infantometer  
41 (Perspective Enterprises PE-RILB-LTWT, Michigan USA, precision 1 mm). Recumbent  
42 length is recorded to the last completed (not the nearest) mm. Head, chest, and mid upper  
43 arm circumferences (MUAC) is measured to the nearest millimeter (mm) using insertion  
44 tapes (Shorr productions, Maryland USA). Daily calibration checks are made before each  
45 use of infant weighing scales, and length boards to ensure accuracy of measurement  
46 [41,42].  
47  
48  
49  
50  
51  
52

### 53 *Postnatal Visit*

1  
2  
3 Postnatal visits are made at 4-6 weeks for all participants to collect data on maternal and  
4 infant vital status, health, morbidity and anthropometrics. Visits are conducted primarily at  
5 the health center, and home visits are made for those who do not return for follow up. For  
6 infants who follow up at the health center for routine postnatal care or immunizations, study  
7 visits are additionally conducted at 3 and 6 months.  
8  
9  
10

### 11 12 *Cost Data*

13  
14 Data regarding the costs of delivery of the ENAT study interventions is collected in all study  
15 arms. Costs of interventions include three components: system-level costs, costs incurred by  
16 health workers for participating in the interventions, and costs incurred by individual patients and  
17 families. At the system level, costs are captured using the World Health Organization (WHO)  
18 framework [43] using modified survey tools based on our published survey instruments, cost  
19 estimation protocols, and procedures that have been validated and used in other LMICs (e.g.,  
20 Rwanda, India) [44–46]; Costs incurred by health workers for receiving training include time or  
21 money spent for participating in training sessions. For all time spent, monetary value is assigned  
22 based on their average hourly wage. Costs incurred by patients include costs or time spent for  
23 received care or home visits. For visits in health facilities, we collect self-reported cost data from  
24 patients.  
25  
26  
27  
28  
29  
30  
31  
32

33 *Biospecimens:* In a subset of consenting women, additional biospecimens will be collected for  
34 future analysis. These specimens are shown in Web Table 5.  
35  
36  
37

### 38 **Statistical Analysis**

39 The Statistical Analysis Plan (SAP) of the ENAT study is published separately at:  
40 <https://addiscontinental.edu.et/>.  
41  
42  
43

### 44 **Sample Size**

45 We have estimated the effect size detectable with 80% power under a cluster-randomised  
46 design, with 6 health centers per study arm. Fixing recruitment of pregnant women to 18  
47 months, we estimated that within this time period the average health center in the proposed  
48 study site would enroll around 200 women into ANC at  $\leq 24$  weeks gestation, and would yield  
49 112 live born infants weighed within 72 hours of life (assuming ~70% of enrolled pregnancies  
50 result in a live birth, and ~80% are followed up and weighed within 72 hours). Beyond the  
51 above determination of average cluster size, we have additionally made the following  
52  
53  
54  
55  
56  
57  
58  
59  
60

assumptions in order to estimate effect sizes detectable with 80% power: 1) mean birthweight and standard deviation as per prior studies in Gondor (mean birth weight of 2900 gm, SD 450gm) and 2) variation in distribution of weight between clusters as reflected through an coefficient of variation ( $k=0.01$ ) [47]. In total this includes 2,400 pregnant mothers enrolled in 12 health centers, resulting in 1,440 live births with a birthweight within 72 hours. This sample size provides 80% power to detect a 66 gram difference in birthweight between the ENAT EIMP or routine care group in a marginal analysis (i.e. irrespective of whether mothers did or did not receive the ENP), and a 90 gm difference between ENP vs routine care (marginal analysis).

*Length.* With the assumptions of clusters and enrollment above, we assumed mean infant length of 49.5 cm (SD 2.4) (based on the Malawi LAIS study [48,49] and coefficient of variation  $k=0.008$  (sector level variation in JiVitA study) [47]. For the EIMP vs. routine care comparison, we would have 80% power to detect a 3.0 mm difference in mean infant length. For the ENP vs. non-ENP comparison (marginal analysis) we would have 80% power to detect a 7.8 mm difference in infant length between the women receiving the package of enhanced nutrition-infection compared to standard nutrition care.

### **Study Monitoring**

An external Study Monitoring Committee (SMC) is established to monitor the progress of the study, including enrollment, progress indicators and adverse events. The SMC includes an independent Ethiopian obstetrician (Dr. Delayehu Bekele) and an epidemiologist (Professor Simon Cousens). The committee met before study initiation, at mid-enrollment, and every 6 months to review study progress. Interim analysis will not be performed.

### **ETHICS AND DISSEMINATION**

**Research Ethics approval:** The ENAT protocol was approved at Addis Continental Institute of Public Health (001-A1-2019) and Mass General Brigham Institutional Review Board (2018P002479). The APHI granted local permission to conduct the study.

The study is registered at ISRCTN (ISRCTN15116516). Protocol modifications will be communicated to respective IRBs and ISRCTN.

### **Confidentiality**

All the data collected for this study is kept strictly confidential at Addis Continental Institute of Public Health on a local encrypted server. Personal identifiers are not used in study-specific

forms, aside from the identifier module. Paper copies of data forms for data entry and analysis are stored in a locked file when not in use. Access to data files containing personal identifying information is limited to the principal investigators and key staff.

### **Ancillary care**

ENAT project helps cover ancillary care related to study participation that is not covered by the health system.

### **Dissemination plan**

ENAT study findings will be disseminated to FMoH, APHI, ARHB, Zonal health departments, woreda health offices, community representatives, and to other relevant stakeholders. Involving relevant stakeholders in the dissemination process will help to enhance ownership of the research output and the ultimate integration of findings into programs. The dissemination will be in the form of presentations in workshops, conferences, and symposiums at local, regional, national, and international levels as appropriate. In addition, reports and peer-review journal publications will be produced.

## **DISCUSSION**

Despite the high global burden of low birthweight, preterm birth and fetal growth restriction, few interventions have demonstrated efficacy or effectiveness in the prevention of these adverse birth outcomes. Novel, integrated approaches are needed to make more substantial, scalable and sustainable impacts in order to meet the WHO's Nutrition targets. A critical feature of the ENAT study is its health systems approach and involvement of key local stakeholders in the design of intervention packages and implementation. The packaging/bundling of interventions aims to maximize their potential impact, cost-effectiveness, learning, and future scalability. This study will provide important evidence on the role of strengthening ANC programs to improve maternal health and birth outcomes, and will help inform future ANC policies in Ethiopia. ENAT will contribute to the growing body of knowledge regarding the effectiveness of BEP supplementation during pregnancy. Secondly, despite the high burden of antenatal infections, there is limited high-quality evidence that interventions to treat prenatal infections improves birth outcomes. To our knowledge, there is even more limited data on the interactions of nutrition and infections in pregnancy and this study will provide novel new insight on the potential for synergistic benefits of an integrated approach. Finally, the study will generate implementation learning on how to optimize delivery of WHO guidelines in resource limited health systems.



## Access to data

The final dataset will be available to the ENAT investigative team and collaborators. Anonymized study data may be made available upon request to the study PIs in accordance with Ethiopian and US regulatory guidelines.

## Declaration of interests

### *Financial and competing interests of the PIs*

ACL reports funding from the Bill & Melinda Gates Foundation, Eunice Kennedy Shriver National Institute of Child Health and Human Development and the World Health Organization. YB reports funding from FORMAS, USAID, National Institute of Environmental Health Sciences and from the Bill & Melinda Gates Foundation. BJW reports funding from National Institute of Environmental Health Sciences and from the Bill & Melinda Gates Foundation.

**Funding Statement:** This work was supported by the Bill & Melinda Gates Foundation grant number OPP1184363. The funder provided input on the study design, but played no role in the data collection, data analysis, interpretation of data, writing of the report or decision to submit the report for publication.

## Acknowledgements

We would like to thank the ENAT partners for their support and contributions to the study, including the Amhara Regional Health Bureau, Amhara Public Health Institute, Ethiopian Federal Ministry of Health, Ethiopian Society of Obstetrics and Gynecology, General Electric, Ethiopian Society of Radiology, and Jhpiego. We acknowledge the Child Investment Fund who supported Jhpiego health systems strengthening efforts in study areas. We would also like to thank our Study Monitoring Committee, Dr. Delayehu Bekele and Professor Simon Cousens.

## Author Contributions

Wrote manuscript: ACL, LCM, FW, ME, YB

Designed study/protocol: ACL, FW, LCM, EB, ME, GC, PC, SI, CL, RM, AWT, BJW, AQ, YB

Designed study materials/study tools: ACL, FW, EB, YB, MD, ME, NF, IO, WK, TS, FS, FT, ST, KY, SI, YK, CL, RM, MS, FV, AWT, YB

Trained field data collectors: FW, EB, YB, MD, ME, WK, TS, FS, FT, ST, KY, AWT, ACL, YB

Designed Data management system: NF, FS, FT, FV, AW

Trained ultrasonography: MS, BW, KY, ST

Critically reviewed/revised manuscript: all authors

All authors have met ICJME criteria.



1  
2  
3 **FIGURE CAPTIONS**  
4  
5

6 **Figure 1. Conceptual diagram showing the pathways that link maternal undernutrition,**  
7 **maternal infection, and infant outcomes** (A, B, and C represent mechanisms, which are  
8 described in detail in the associated sections above)  
9

10 **Figure 2. ENAT Study Consort Diagram**  
11

12 **Figure 3. ENAT Study Site Map, Amhara Region, Ethiopia**  
13  
14  
15  
16  
17  
18  
19  
20  
21  
22  
23  
24  
25  
26  
27  
28  
29  
30  
31  
32  
33  
34  
35  
36  
37  
38  
39  
40  
41  
42  
43  
44  
45  
46  
47  
48  
49  
50  
51  
52  
53  
54  
55  
56  
57  
58  
59  
60

## REFERENCES

- 1 World Health Organization. Global nutrition targets 2025: low birth weight policy brief. Geneva, Switzerland: 2014.
- 2 Blencowe H, Krusevec J, de Onis M, *et al*. National, regional, and worldwide estimates of low birthweight in 2015, with trends from 2000: a systematic analysis. *Lancet Glob Health* 2019;**7**:e849–60. doi:10.1016/S2214-109X(18)30565-5
- 3 Katz J, Lee AC, Kozuki N, *et al*. Mortality risk in preterm and small-for-gestational-age infants in low-income and middle-income countries: a pooled country analysis. *Lancet* 2013;**382**:417–25. doi:10.1016/S0140-6736(13)60993-9
- 4 Christian P, Lee SE, Donahue Angel M, *et al*. Risk of childhood undernutrition related to small-for-gestational age and preterm birth in low- and middle-income countries. *Int J Epidemiol* 2013;**42**:1340–55. doi:10.1093/ije/dyt109
- 5 Blencowe H, Lee ACC, Cousens S, *et al*. Preterm birth-associated neurodevelopmental impairment estimates at regional and global levels for 2010. *Pediatr Res* 2013;**74 Suppl 1**:17–34. doi:10.1038/pr.2013.204
- 6 Murray E, Fernandes M, Fazel M, *et al*. Differential effect of intrauterine growth restriction on childhood neurodevelopment: a systematic review. *BJOG* 2015;**122**:1062–72. doi:10.1111/1471-0528.13435
- 7 Danaei G, Andrews KG, Sudfeld CR, *et al*. Risk factors for childhood stunting in 137 developing countries: A comparative risk assessment analysis at global, regional, and country levels. *PLoS Med* 2016;**13**:e1002164. doi:10.1371/journal.pmed.1002164
- 8 Han Z, Mulla S, Beyene J, *et al*. Maternal underweight and the risk of preterm birth and low birth weight: a systematic review and meta-analyses. *Int J Epidemiol* 2011;**40**:65–101. doi:10.1093/ije/dyq195
- 9 Kozuki N, Katz J, Lee ACC, *et al*. Short Maternal Stature Increases Risk of Small-for-Gestational-Age and Preterm Births in Low- and Middle-Income Countries: Individual Participant Data Meta-Analysis and Population Attributable Fraction. *J Nutr* 2015;**145**:2542–50. doi:10.3945/jn.115.216374
- 10 Peña-Rosas JP, De-Regil LM, Garcia-Casal MN, *et al*. Daily oral iron supplementation during pregnancy. *Cochrane Database Syst Rev* 2015;:CD004736. doi:10.1002/14651858.CD004736.pub5

- 1  
2  
3 11 Keats EC, Neufeld LM, Garrett GS, *et al.* Improved micronutrient status and  
4 health outcomes in low- and middle-income countries following large-scale  
5 fortification: evidence from a systematic review and meta-analysis. *Am J Clin Nutr*  
6 2019;**109**:1696–708. doi:10.1093/ajcn/nqz023  
7  
8  
9 12 Imdad A, Bhutta ZA. Maternal nutrition and birth outcomes: effect of balanced  
10 protein-energy supplementation. *Paediatr Perinat Epidemiol* 2012;**26 Suppl**  
11 **1**:178–90. doi:10.1111/j.1365-3016.2012.01308.x  
12  
13 13 Ota E, Hori H, Mori R, *et al.* Antenatal dietary education and supplementation to  
14 increase energy and protein intake. *Cochrane Database Syst Rev*  
15 2015;:CD000032. doi:10.1002/14651858.CD000032.pub3  
16  
17  
18 14 Buppasiri P, Lumbiganon P, Thinkhamrop J, *et al.* Calcium supplementation  
19 (other than for preventing or treating hypertension) for improving pregnancy and  
20 infant outcomes. *Cochrane Database Syst Rev* 2011;:CD007079.  
21 doi:10.1002/14651858.CD007079.pub2  
22  
23  
24 15 Gilbert NM, O'Brien VP, Hultgren S, *et al.* Urinary tract infection as a preventable  
25 cause of pregnancy complications: opportunities, challenges, and a global call to  
26 action. *Glob Adv Health Med* 2013;**2**:59–69. doi:10.7453/gahmj.2013.061  
27  
28  
29 16 Romero R, Oyarzun E, Mazor M, *et al.* Meta-analysis of the relationship between  
30 asymptomatic bacteriuria and preterm delivery/low birth weight. *Obstet Gynecol*  
31 1989;**73**:576–82.  
32  
33  
34 17 Honkpéhèdji YJ, Adegbite BR, Zinsou JF, *et al.* Association of low birth weight  
35 and polyparasitic infection during pregnancy in Lambaréné, Gabon. *Trop Med Int*  
36 *Health* 2021;**26**:973–81. doi:10.1111/tmi.13591  
37  
38  
39 18 Aderoba AK, Iribhogbe OI, Olagbuji BN, *et al.* Prevalence of helminth infestation  
40 during pregnancy and its association with maternal anemia and low birth weight.  
41 *Int J Gynaecol Obstet* 2015;**129**:199–202. doi:10.1016/j.ijgo.2014.12.002  
42  
43  
44 19 Abioye AI, McDonald EA, Park S, *et al.* Maternal, placental and cord blood  
45 cytokines and the risk of adverse birth outcomes among pregnant women  
46 infected with *Schistosoma japonicum* in the Philippines. *PLoS Negl Trop Dis*  
47 2019;**13**:e0007371. doi:10.1371/journal.pntd.0007371  
48  
49  
50 20 Goldenberg RL, Hauth JC, Andrews WW. Intrauterine infection and preterm  
51 delivery. *N Engl J Med* 2000;**342**:1500–7. doi:10.1056/NEJM200005183422007  
52  
53  
54 21 Christensen DL, Kapur A, Bygbjerg IC. Physiological adaption to maternal  
55 malaria and other adverse exposure: low birth weight, functional capacity, and  
56 possible metabolic disease in adult life. *Int J Gynaecol Obstet* 2011;**115 Suppl**  
57 **1**:S16-9. doi:10.1016/S0020-7292(11)60006-4  
58  
59

- 1  
2  
3 22 Krawinkel MB. Interaction of nutrition and infections globally: an overview. *Ann*  
4 *Nutr Metab* 2012;**61 Suppl 1**:39–45. doi:10.1159/000345162  
5  
6  
7 23 Vohr BR, Poggi Davis E, Wanke CA, *et al.* Neurodevelopment: The Impact of  
8 Nutrition and Inflammation During Preconception and Pregnancy in Low-  
9 Resource Settings. *Pediatrics* 2017;**139**:S38–49. doi:10.1542/peds.2016-2828F  
10  
11 24 Kim H, Hwang JY, Ha EH, *et al.* Association of maternal folate nutrition and  
12 serum C-reactive protein concentrations with gestational age at delivery. *Eur J*  
13 *Clin Nutr* 2011;**65**:350–6. doi:10.1038/ejcn.2010.267  
14  
15  
16 25 Kutlesic V, Brewinski Isaacs M, Freund LS, *et al.* Executive Summary: Research  
17 Gaps at the Intersection of Pediatric Neurodevelopment, Nutrition, and  
18 Inflammation in Low-Resource Settings. *Pediatrics* 2017;**139**:S1–11.  
19 doi:10.1542/peds.2016-2828C  
20  
21  
22 26 Collin SM, Baggaley RF, Pittrof R, *et al.* Could a simple antenatal package  
23 combining micronutritional supplementation with presumptive treatment of  
24 infection prevent maternal deaths in sub-Saharan Africa? *BMC Pregnancy*  
25 *Childbirth* 2007;**7**:6. doi:10.1186/1471-2393-7-6  
26  
27 27 World Health Organization (WHO). WHO recommendations on antenatal care for  
28 a positive pregnancy experience. 2016.  
29  
30  
31 28 Central Statistical Agency CSAE, Icf. Ethiopia Demographic and Health Survey  
32 2016. Addis Ababa, Ethiopia: : CSA and ICF 2017.  
33  
34 29 Ethiopia Mini Demographic and Health Survey 2019: Key indicators. Rockville,  
35 Maryland, USA: EPHI and ICF: : Ethiopian Public Health Institute (EPHI)  
36 [Ethiopia] and ICF 2019.  
37  
38  
39 30 Shiferaw MB, Zegeye AM, Mengistu AD. Helminth infections and practice of  
40 prevention and control measures among pregnant women attending antenatal  
41 care at Anbesame health center, Northwest Ethiopia. *BMC Res Notes*  
42 2017;**10**:274. doi:10.1186/s13104-017-2609-6  
43  
44  
45 31 Belyhun Y, Medhin G, Amberbir A, *et al.* Prevalence and risk factors for soil-  
46 transmitted helminth infection in mothers and their infants in Butajira, Ethiopia: a  
47 population based study. *BMC Public Health* 2010;**10**:21. doi:10.1186/1471-2458-  
48 10-21  
49  
50  
51 32 Workneh F, Eglovitch M, Shiferaw T, *et al.* Dietary practices among pregnant  
52 women in rural amhara, ethiopia. *Curr Dev Nutr* 2021;**5**:698–698.  
53 doi:10.1093/cdn/nzab045\_080  
54  
55  
56  
57  
58  
59  
60

- 1  
2  
3 33 Baye E, Abate FW, Eglovitch M, *et al.* Effect of birthweight measurement quality  
4 improvement on low birthweight prevalence in rural Ethiopia. *Popul Health Metr*  
5 2021;**19**:35. doi:10.1186/s12963-021-00265-0  
6  
7  
8 34 Members Of An Expert Consultation On Nutritious Food Supplements For  
9 Pregnant And Lactating Women. Framework and specifications for the nutritional  
10 composition of a food supplement for pregnant and lactating women (PLW) in  
11 undernourished and low income settings. *Gates Open Res* Published Online  
12 First: 2019. doi:10.21955/gatesopenres.1116379.1  
13  
14  
15 35 Institute of Medicine. Dietary Reference Intakes (DRIs): Recommended Dietary  
16 Allowances and Adequate Intakes. Washington, DC: The National Academies  
17 Press  
18  
19  
20 36 Federal Democratic Republic of Ethiopia Ministry of Health. National Guidelines  
21 for the Management of Sexually Transmitted Infections Using Syndromic. Addis  
22 Ababa, Ethiopia: 2015.  
23  
24  
25 37 World Health Organization. Soil-transmitted helminth infections.  
26 2020.[https://www.who.int/news-room/fact-sheets/detail/soil-transmitted-helminth-](https://www.who.int/news-room/fact-sheets/detail/soil-transmitted-helminth-infections)  
27 [infections](https://www.who.int/news-room/fact-sheets/detail/soil-transmitted-helminth-infections) (accessed 8 Sep2021).  
28  
29  
30 38 R Core Team. *R: A language and environment for statistical computing*. Vienna,  
31 Austria: R Foundation for Statistical Computing 2021.  
32  
33 39 Workicho A, Belachew T, Feyissa GT, *et al.* Household dietary diversity and  
34 Animal Source Food consumption in Ethiopia: evidence from the 2011 Welfare  
35 Monitoring Survey. *BMC Public Health* 2016;**16**:1192. doi:10.1186/s12889-016-  
36 3861-8  
37  
38 40 International Fetal and Newborn Growth Consortium. The International Fetal and  
39 Newborn Growth Standards for the 21st Century(INTERGROWTH-21st) Study  
40 Protocol. 2009.  
41  
42  
43 41 de Onis M, Onyango AW, Borghi E, *et al.* Comparison of the World Health  
44 Organization (WHO) Child Growth Standards and the National Center for Health  
45 Statistics/WHO international growth reference: implications for child health  
46 programmes. *Public Health Nutr* 2006;**9**:942–7. doi:10.1017/phn20062005  
47  
48  
49 42 Bloem M. The 2006 WHO child growth standards. *BMJ* 2007;**334**:705–6.  
50 doi:10.1136/bmj.39155.658843.BE  
51  
52 43 The world health report 2000 - Health systems: improving performance. Geneva,  
53 Switzerland: : World Health Organization 2000.  
54  
55  
56  
57  
58  
59  
60

- 1  
2  
3 44 Lu C, Tsai S, Ruhumuriza J, *et al.* Tracking rural health facility financial data in  
4 resource-limited settings: a case study from Rwanda. *PLoS Med*  
5 2014;**11**:e1001763. doi:10.1371/journal.pmed.1001763  
6  
7  
8 45 Tsai S, Umugiraneza G, Ruhumuriza J, *et al.* Training manual on tracking  
9 financial data in health facilities in Kayonza and Kirehe. Boston, MA: : Program in  
10 Global Health Economics and Social Change, Harvard Medical School 2013.  
11  
12 46 Lu C, Tsai S, Ruhumuriza J, *et al.* Obtaining financing data for local health  
13 facilities in two districts of Rwanda: General guidelines. Boston, MA: : Program in  
14 Global Health Economics and Social Change, Harvard Medical School 2013.  
15  
16  
17 47 West KP, Shamim AA, Mehra S, *et al.* Effect of maternal multiple micronutrient  
18 vs iron-folic acid supplementation on infant mortality and adverse birth outcomes  
19 in rural Bangladesh: the JiVitA-3 randomized trial. *JAMA* 2014;**312**:2649–58.  
20 doi:10.1001/jama.2014.16819  
21  
22  
23 48 Luntamo M, Kulmala T, Mbewe B, *et al.* Effect of repeated treatment of pregnant  
24 women with sulfadoxine-pyrimethamine and azithromycin on preterm delivery in  
25 Malawi: a randomized controlled trial. *Am J Trop Med Hyg* 2010;**83**:1212–20.  
26 doi:10.4269/ajtmh.2010.10-0264  
27  
28  
29 49 Luntamo M, Kulmala T, Cheung YB, *et al.* The effect of antenatal monthly  
30 sulphadoxine-pyrimethamine, alone or with azithromycin, on foetal and neonatal  
31 growth faltering in Malawi: a randomised controlled trial. *Trop Med Int Health*  
32 2013;**18**:386–97. doi:10.1111/tmi.12074  
33  
34  
35  
36  
37  
38  
39  
40  
41  
42  
43  
44  
45  
46  
47  
48  
49  
50  
51  
52  
53  
54  
55  
56  
57  
58  
59  
60

1  
2  
3  
4  
5  
6  
7  
8  
9  
10  
11  
12  
13  
14  
15  
16  
17  
18  
19  
20  
21  
22  
23  
24  
25  
26  
27  
28  
29  
30  
31  
32  
33  
34  
35  
36  
37  
38  
39  
40  
41  
42  
43  
44  
45  
46  
47  
48  
49  
50  
51  
52  
53  
54  
55  
56  
57  
58  
59  
60

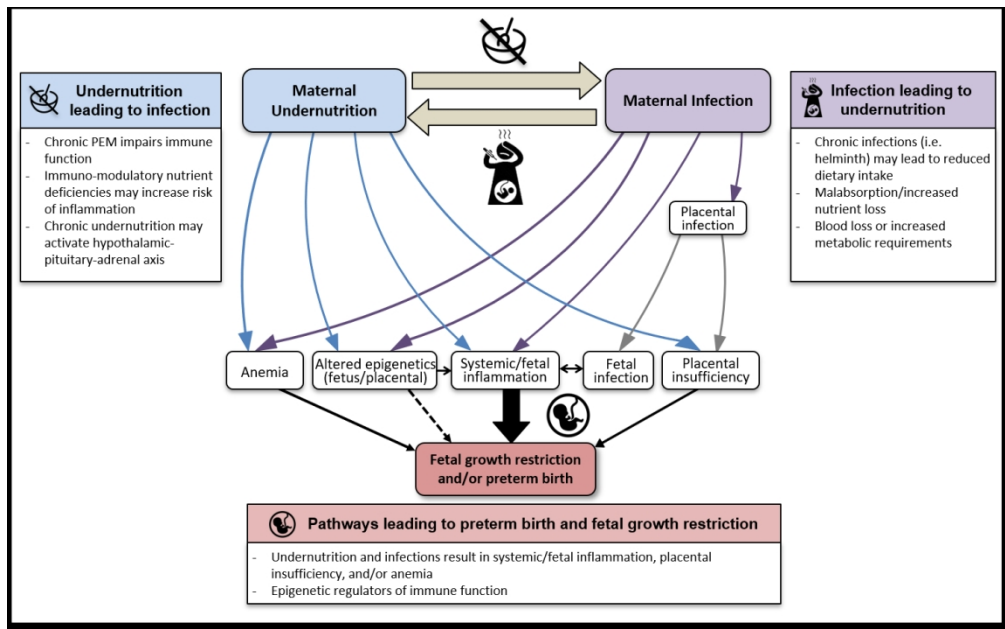

319x199mm (118 x 118 DPI)

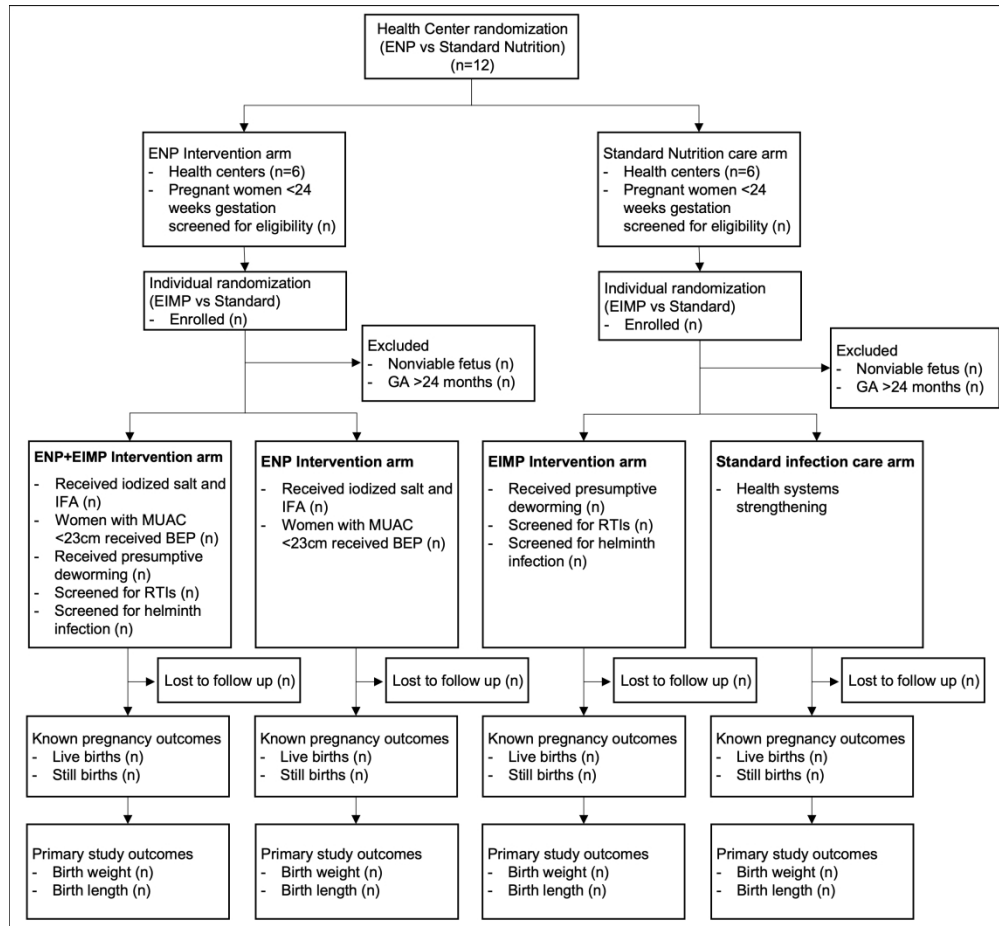

653x606mm (118 x 118 DPI)



1  
2  
3  
4  
5  
6  
7  
8  
9  
10  
11  
12  
13  
14  
15  
16  
17  
18  
19  
20  
21  
22  
23  
24  
25  
26  
27  
28  
29  
30  
31  
32  
33  
34  
35  
36  
37  
38  
39  
40  
41  
42  
43  
44  
45  
46  
47  
48  
49  
50  
51  
52  
53  
54  
55  
56  
57  
58  
59  
60

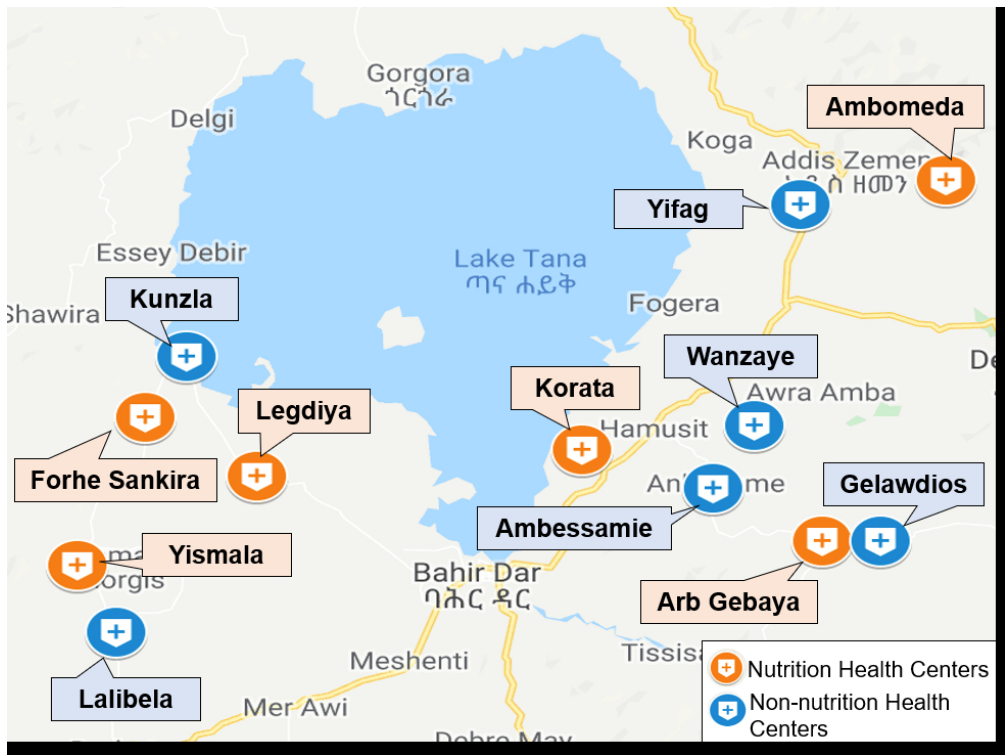

210x157mm (118 x 118 DPI)

## WEBAPPENDIX

Web Table 1. WHO Recommendations for Antenatal Care

| Nutritional Interventions                                                                                                                                                                                                                                                                                                                                       |                                            |
|-----------------------------------------------------------------------------------------------------------------------------------------------------------------------------------------------------------------------------------------------------------------------------------------------------------------------------------------------------------------|--------------------------------------------|
| A.1.1: Counselling about healthy eating and keeping physically active during pregnancy is recommended for pregnant women to stay healthy and to prevent excessive weight gain during pregnancy.                                                                                                                                                                 | Recommended                                |
| A.1.2: In undernourished populations, nutrition education on increasing daily energy and protein intake is recommended for pregnant women to reduce the risk of low-birth-weight neonates.                                                                                                                                                                      | Context-specific recommendation            |
| A.1.3: In undernourished populations, balanced energy and protein dietary supplementation is recommended for pregnant women to reduce the risk of stillbirths and small-for-gestational-age neonates.                                                                                                                                                           | Context-specific recommendation            |
| A.2.1: Daily oral iron and folic acid supplementation with 30 mg to 60 mg of elemental iron and 400 µg (0.4 mg) of folic acid is recommended for pregnant women to prevent maternal anaemia, puerperal sepsis, low birth weight, and preterm birth.                                                                                                             | Recommended                                |
| A.2.2: Intermittent oral iron and folic acid supplementation with 120 mg of elemental iron and 2800 µg (2.8 mg) of folic acid once weekly is recommended for pregnant women to improve maternal and neonatal outcomes if daily iron is not acceptable due to side-effects, and in populations with an anaemia prevalence among pregnant women of less than 20%. | Context-specific recommendation            |
| A.3: In populations with low dietary calcium intake, daily calcium supplementation (1.5–2.0 g oral elemental calcium) is recommended for pregnant women to reduce the risk of pre-eclampsia.                                                                                                                                                                    | Context-specific recommendation            |
| A.4: Vitamin A supplementation is only recommended for pregnant women in areas where vitamin A deficiency is a severe public health problem, to prevent night blindness.                                                                                                                                                                                        | Context-specific recommendation            |
| A.5: Zinc supplementation for pregnant women is only recommended in the context of rigorous research.                                                                                                                                                                                                                                                           | Context-specific recommendation (research) |
| A.10: For pregnant women with high daily caffeine intake (more than 300 mg per day), lowering daily caffeine intake during pregnancy is recommended to reduce the risk of pregnancy loss and low-birth-weight neonates.                                                                                                                                         | Context-specific recommendation            |
| Maternal Assessment                                                                                                                                                                                                                                                                                                                                             |                                            |
| B.1.1: Full blood count testing is the recommended method for diagnosing anaemia in pregnancy. In settings where full blood count testing is not available, on-site haemoglobin testing with a haemoglobinometer is recommended over the use of the haemoglobin colour scale as the method for diagnosing anaemia in pregnancy.                                 | Context-specific recommendation            |
| B.1.2: Midstream urine culture is the recommended method for diagnosing asymptomatic bacteriuria (ASB) in pregnancy. In settings where urine culture is not available, on-site midstream urine Gram-staining is recommended over the use of dipstick tests as the method for diagnosing ASB in pregnancy.                                                       | Context-specific recommendation            |
| B.2.4: One ultrasound scan before 24 weeks of gestation (early ultrasound) is recommended for pregnant women to estimate gestational age, improve detection of fetal anomalies and multiple pregnancies, reduce induction of labour for post-term pregnancy, and improve a woman's pregnancy experience.                                                        | Recommended                                |
| Preventive Measures                                                                                                                                                                                                                                                                                                                                             |                                            |
| C.1: A seven-day antibiotic regimen is recommended for all pregnant women with asymptomatic bacteriuria (ASB) to prevent persistent bacteriuria, preterm birth and low birth weight.                                                                                                                                                                            | Recommended                                |
| C.2: Antibiotic prophylaxis is only recommended to prevent recurrent urinary tract infections in pregnant women in the context of rigorous research.                                                                                                                                                                                                            | Context-specific recommendation (research) |
| C.4: In endemic areas, preventive anthelmintic treatment is recommended for pregnant women after the first trimester as part of worm infection reduction programmes.                                                                                                                                                                                            | Context-specific recommendation            |

**Web Table 2. Super Cereal Corn Soya Blend Composition (per daily 200 gm serving)**

| NUTRIENT    | Units  | ENAT CSB CONTENT (200 gm) | Recommended Target*             |
|-------------|--------|---------------------------|---------------------------------|
| Energy      | Kcal   | 760                       | 250-500kcal per daily serving** |
| Protein     | gm     | 28                        | 14-18 g**                       |
| Fat         | %      | 12%                       | 10-60% of energy                |
| Vitamin A   | mcg RE | 2076                      | 550-770***                      |
| Vitamin D   | mcg    | 22.1                      | 10-15                           |
| Vitamin E   | mg     | 16.6                      | 16-19                           |
| Vitamin K   | mcg    | 60                        | 72-90                           |
| Vitamin B1  | mg     | 0.4                       | 1.2-1.4                         |
| Vitamin B2  | mg     | 2.8                       | 1.3-1.6                         |
| Vitamin B3  | mg     | 16                        | 14-18                           |
| Folic Acid  | mcg    | 220                       | 400-600                         |
| Vitamin B6  | mg     | 2.0                       | 1.7-2.0                         |
| Vitamin C   | mg     | 180                       | 100-120                         |
| Calcium     | mg     | 724                       | 500-1500                        |
| Iron        | mg     | 8                         | 22-27                           |
| Iodine      | mcg    | 80                        | 209-290                         |
| Phosphorous | mg     | 560                       | 300-700                         |
| Zinc        | mg     | 10                        | 15-20                           |

\* Targets are results of an Expert Consultation held at Bill and Melinda Gates Foundation.[50]

\*\* Energy balance from macronutrient: portion size can be doubled in settings of high energy gaps, such as maternal malnutrition and where prevalence of low birthweight is high.

\*\*\* Micronutrient recommendations were primarily based upon Institute of Medicine (IOM) estimated average requirement (EAR) and recommended dietary allowances (RDA) values.

Web Table 3. Classification of UTI in ENAT study

| <b>UTI Terminology</b>                        | <b>Definition</b>                                                                                                                                                                                                                                     |
|-----------------------------------------------|-------------------------------------------------------------------------------------------------------------------------------------------------------------------------------------------------------------------------------------------------------|
| <b><i>High-burden growth</i></b>              | bacteriuria of $>10^5$ colony forming units (CFU) per 1mL of urine of a single uropathogen [49],                                                                                                                                                      |
| <b><i>Intermediate growth</i></b>             | bacteriuria with $>10^3$ - $10^5$ CFU/mL of a single uropathogen,                                                                                                                                                                                     |
| <b><i>Contamination</i></b>                   | bacterial growth of $\geq 3$ micro-organism OR growth of a non-urinary tract pathogen.                                                                                                                                                                |
| <b><i>UTI symptoms</i></b>                    | dysuria, urinary frequency, urinary urgency, hematuria, abdominal pain, fever, OR flank pain                                                                                                                                                          |
| <b><i>Symptomatic intermediate growth</i></b> | women with intermediate burden growth and UTI symptoms (as above)                                                                                                                                                                                     |
| <b><i>Asymptomatic bacteriuria</i></b>        | women with high burden bacterial growth without UTI symptoms                                                                                                                                                                                          |
| <b><i>Cystitis</i></b>                        | women with positive urine culture (high burden or intermediate growth) and symptoms of dysuria, urinary frequency, hematuria, urinary urgency or suprapubic tenderness, without upper urinary tract symptoms (fever, chills, flank or back pain) [49] |
| <b><i>Pyelonephritis</i></b>                  | women with positive urine culture and systemic symptoms (fever, chills, flank pain or back pain) [49].                                                                                                                                                |

**Web Table 4. Recommended Treatments for Parasitic Stool Infections  
FMHACA Standard Treatment Guideline, 3<sup>rd</sup> Edition 2014**

| Intestinal parasite                                                                                       | Recommended treatment, and alternative                                                                                                                               |
|-----------------------------------------------------------------------------------------------------------|----------------------------------------------------------------------------------------------------------------------------------------------------------------------|
| <b><i>Entamoeba Histolytica</i></b>                                                                       | Metronidazole 500 mg P.O. TID x 5-7 days                                                                                                                             |
| <b><i>Giardia lamblia</i></b>                                                                             | Tinidazole 2 gm po single dose<br>Or Alternative:<br>Metronidazole 500 mg po TID x 5 days                                                                            |
| <b>Ascariasis</b><br><b><i>Ascaris lumbricoids</i></b>                                                    | Mebendazole, 500mg P.O. once or<br>Albendazole, 400mg P.O. as a single dose<br>Or Alternative:<br>Pyrantel pamoate, 700mg P.O. as a single dose                      |
| <b>Hookworm infestation</b><br><b><i>Necator americanus</i> or</b><br><b><i>Ancylostoma duodenale</i></b> | Mebendazole, 500mg stat or 100mg P.O. BID for 3 days<br>Albendazole, 400mg P.O. as a single dose<br>Or Alternative:<br>Pyrantel pamoate, 700mg P.O. as a single dose |
| <b>Enterobiasis</b><br><b><i>Enterobius Vermicularis</i></b>                                              | Mebendazole, 100mg P.O. BID for 3 days or<br>Or Alternative:<br>Albendazole, 400mg P.O. as a single dose                                                             |
| <b>Trichuriasis</b><br><b><i>T.tricur</i> [Whipworm]</b>                                                  | Mebendazole, 500mg P.O. single dose or,<br>Or Alternative:<br>Albendazole, 400mg, P.O. for three days                                                                |
| <b>Taeniasis</b><br><b><i>T.saginata</i> or <i>T.solium</i></b>                                           | Praziquantel P.O. 600mg or 10mg/Kg, single dose<br>Or Alternative:<br>Niclosamide, 2g in a single dose P.O.                                                          |
| <b><i>Hymenolepis nana</i></b>                                                                            | Praziquantel, 25mg/kg or 1800mg P.O. single dose<br>Alternative:<br>Niclosamide, 2g P.O. on the first day followed by 1g QD for 6 days                               |
| <b><i>Schistosoma Mansoni</i></b>                                                                         | Praziquantel P.O. 1200 mg single dose (or 600 mg po in 2 doses)                                                                                                      |
| <b>Strongyloidiasis</b><br><b><i>Strongloidexs</i></b><br><b><i>stercolaries</i></b>                      | Albendazole 400mg P.O. BID for three consecutive days.                                                                                                               |

## Web Table 5. Biological Specimens Collected in ENAT Study

A table of biospecimens and planned lab testing is presented below. Biospecimens collected for immediate analyses at the APHI laboratory are stored at room temperature using special collection containers and swabs designed to meet this storage requirement. Samples collected for future analyses are aliquoted to appropriate containers and stored at APHI for long term storage in a specially procured freezer for this purpose. All samples are stored for up to 5 years.

### ENAT Bio-specimens

| Biospecimen               | N (Total) | Planned lab testing                                                             | Antenatal |            | Post-natal |         |
|---------------------------|-----------|---------------------------------------------------------------------------------|-----------|------------|------------|---------|
|                           |           |                                                                                 | ≤24 wks   | ~30-34 wks | 0 -<72 hrs | 1-2 mo. |
|                           |           |                                                                                 | Enroll    | ANCFU2     | Birth      | 1-2 mo. |
| Maternal urine            | 800       | Culture, subset of 600 for iodine concentration, selenium, environmental toxins |           |            |            |         |
| Maternal vaginal swab     | 150       | STI/RTI                                                                         |           |            |            |         |
| Maternal blood serum      | 700       | Nutrient levels, TORCH infections                                               |           |            |            |         |
| blood spot                | 1000      | Inflammation, thyroid, nutrients, miRNAs                                        |           |            |            |         |
| VAMS + DBS                | 120       | metabolomics, proteomics                                                        |           |            |            |         |
| Maternal vaginal swab     | 150       | Microbiome, metabolome                                                          |           |            |            |         |
| Maternal stool            | 120       | Microbiome                                                                      |           |            |            |         |
| Maternal oral sample      | 120       | Microbiome                                                                      |           |            |            |         |
| Umbilical cord blood/spot | 650       | Inflammation, thyroid, nutrients, miRNAs                                        |           |            |            |         |
| Infant blood (VAMS + DBS) | 120       | Metabolomics, Proteomics                                                        |           |            |            |         |
| Infant stool              | 160       | Microbiome                                                                      |           |            |            |         |
| Infant oral sample        | 100       | Microbiome, CMV                                                                 |           |            |            |         |
| Breast milk               | 100       | Nutrient composition, microbiome                                                |           |            |            |         |

## Web Form 1. Model Informed Consent Form

### Information sheet and Consent: ENP Arm

**Name of the organization:** Addis Continental Institute of Public Health

**Name of the Sponsor:** Bill and Melinda Gates Foundation and Brigham and Women's Hospital

Good morning/Good afternoon.

My name is \_\_\_\_\_. I am a study nurse at Addis Continental Institute of Public Health (ACIPH). ACIPH is doing the ENAT study together with the Federal Ministry of Health, Amhara Regional Health Bureau, Amhara Public Health Institute, and other partners.

**Purpose:** We are asking you to become part of a research study that has a goal to improve the health of the pregnant women and their babies. The main goal of the study is to see if babies will grow better in the womb if pregnant women are provided with better nutrition and are treated for infections in pregnancy. Pregnant women will be enrolled if they are less than 6 months pregnant and will be followed up to 6 months after the baby's birth. The total number of pregnant women enrolled in this study will be 3,600.

**Explanation of study procedures:**

We will measure your height, weight, and middle upper arm circumference. If your middle-upper arm circumference is  $>23$  cm, you will be given iodized salt and iron folate to be consumed daily until you deliver your baby. Whenever you come to the health center, a midwife will give nutrition counseling about nutrients in IFA and iodized salt and maintaining appropriate weight gain during pregnancy for you and your baby.

If the study nurse finds that your arm size is small (middle upper arm circumference  $<23$  cm), you will also be provided a nutritious food supplement of a corn soy blend flour. You may use the corn soy blend to make a daily serving to take on each day. These supplements will be given to you at the health center once a month until you give birth. We believe this will give the unborn baby the nutrition s/he needs to grow better.

We also hope that treating infections in pregnancy will help you to have a healthier pregnancy, increase the chances that the baby will deliver at the expected due date, and help the baby grow better in the womb.

If you decide to participate in the study, you will be put into one of two groups. The study team will choose which group you will be put into randomly. There is no way to tell which group you will be in. Neither you, the study staff, nor the health workers can choose what group you will be in. You will have an equal chance of being placed in either of the two group.

If you are assigned to the first group, you will be tested and treated for certain infections. You will be given deworming medication during the second trimester of your pregnancy, and you will be asked to provide a stool sample to screen and treat for persistent helminthiasis (worms) in the

1  
2  
3 third trimester. You also be asked to give a sample of your urine to test for infection that may  
4 affect your health and the health of the baby. The study nurse and laboratory personnel will  
5 demonstrate to you how to collect the sample. The urine sample will be analyzed at APHI and  
6 you will be asked to come back to the health center within 7 days to get results from your tests.  
7

8  
9 If you are not in the first group, you will receive the routine antenatal care that is provided at the  
10 health center. You will not receive any additional testing or treatment.  
11

12 After your baby is born, we will need to very carefully measure your baby's height, weight,  
13 chest, head and arm size. It is important these measurements happen within three days of giving  
14 birth. Even if you give birth at home, a trained person will visit you to carefully take them. We  
15 may also measure your baby at a later study visits at 1, 3, and 6 months.  
16

17  
18 We ask for your permission to be contacted during the study to remind you of study visits, to  
19 notify you that your test results have arrived, visit you in case of birth at home and/or to allow us  
20 to come to your house to measure the level of iodine in the salt that you use for household  
21 consumption. We will remind you about your visit by phone call or text message. If you do not  
22 respond, we may visit your home. Please show below how you agree to be contacted:  
23

- 24  Text message (to you or a family member with a phone)  
25  
26  Phone call (to you or a family member with a phone)  
27  
28  Home visit (If you do not come to the facility for your visit, a study staff may visit you at  
29 your home.)  
30  
31

32  
33 Participants for these activities are pregnant women, less than 6 months pregnant, who come for  
34 ANC at health centers at the study site during the study period. If you are willing to be a part of  
35 the study, you need to understand and sign this form. All your personal information for this study  
36 will be kept private in our office where no one will be able to see it. Your identity will not be  
37 used in any reports or publications that come from the study.  
38

39  
40 **Risk or discomforts:** You may feel embarrassed or nervous answering some questions about  
41 your health and your baby's health. You do not have to answer every question if you do not want  
42 to.  
43

44 There also maybe risk of aside effect to a medication. If you are treated for an infection, all of  
45 the medicines that will be given by your midwife are routine and considered safe to have while  
46 pregnant and are not known to hurt the baby.  
47

48  
49 We will give you our phone number so that you can call us with any concerns about bad  
50 reactions to any of the medications. We will help you to be seen and treated at the health center  
51 or nearby hospital and help pay the cost of treatment or transportation if it's absolutely  
52 necessary.  
53

54  
55 **Benefits:** All mothers who join in the study will get an ultrasound and at the third trimester (28  
56 weeks of GA), that will help make sure your pregnancy is healthy. You will be screened for  
57  
58  
59



1  
2  
3 anemia, get iodized salt that may help you to be more nourished and help your baby grow. If you  
4 have poor nutrition, you will get a corn soy blend flour containing nutrients to eat every day.  
5 This supplement may also help improve your and your baby's nutrition during the pregnancy.  
6

7  
8 Some mothers will be tested for infections and get treatment that will help your and your baby's  
9 health. Though you may not get money or gifts, being a part of the study is very important in  
10 making programs that can help mother and child health, especially in helping babies grow and  
11 develop better in the womb.  
12

13  
14 **Confidentiality and Anonymity:** Information about you that we will collect by this research  
15 project will be kept. Your personal information will not be seen by anyone except the study  
16 team, and it will only be used for this research. No identities will be used in any reports or  
17 publications resulting from the study.  
18

19  
20 **Right to Refuse or Withdraw:** Being a part of this study and everything you are asked to do is  
21 completely voluntary. You have the full right to refuse from being a part of this study. You also  
22 have the full right to stop being a part of this study at any time you wish to. Refusing to be in the  
23 study or stopping will not affect the services that you get from the health facility.  
24

25 We thank you very much for your time. If you have any questions, you can call:

26 **Professor Yemane Berhane:** Addis Continental Institute of Public Health,

27 Tel: +251 114 168207/ + 251 911219785 (mobile)

28 E-mail: yemaneberhane@addiscontinental.edu.et OR yemaneberhane@gmail.com  
29

30  
31 **Addis Continental Institute of Public Health,** Tel: +251 116 390039

32 E-mail: aciphaddis@gmail.com  
33  
34  
35  
36  
37  
38  
39  
40  
41  
42  
43  
44  
45  
46  
47  
48  
49  
50  
51  
52  
53  
54  
55  
56  
57  
58  
59  
60

**Consent Form**

I have read this information and decided to be a part of this study. The general purpose of study has been explained well to me and I was given the chance to ask questions. I understand that I can stop my participation and anything for the study at any time.

|                        |                       |                 |
|------------------------|-----------------------|-----------------|
| _____                  | _____                 | _____           |
| Participants name      | Participants age      | ENAT Study ID   |
| _____                  | _____                 |                 |
| Participants signature | Date (DD/MM/YY)       |                 |
| _____                  | _____                 | _____           |
| Study nurse name       | Study nurse signature | Date (DD/MM/YY) |

**If illiterate:**

I have seen the careful reading of the consent form to the potential participant and the participant has been able to ask questions. I agree that the participant has given consent freely.

|                                                                                             |                       |                 |
|---------------------------------------------------------------------------------------------|-----------------------|-----------------|
| _____                                                                                       | _____                 | _____           |
| Witness name                                                                                | Witness signature     | Date (DD/MM/YY) |
| _____                                                                                       | _____                 | _____           |
| Participants name                                                                           | Participants age      | ENAT Study ID   |
| <div style="border: 1px solid black; width: 100px; height: 50px; margin: 10px auto;"></div> |                       |                 |
| Thumb print of participant                                                                  | Date (DD/MM/YY)       |                 |
| _____                                                                                       | _____                 | _____           |
| Study nurse name                                                                            | Study nurse signature | Date (DD/MM/YY) |

# BMJ Paediatrics Open

## The Enhancing Nutrition and Antenatal Infection Treatment (ENAT) Study: Protocol of a pragmatic clinical effectiveness study to improve birth outcomes in Ethiopia

|                               |                                                                                                                                                                                                                                                                                                                                                                                                                                                                                                                                                                                                                                                                                                                                                                                                                                                                                                                                                                                                                                                                                                                                                                                                                                                                                                                                                                                                                                                                                                                                                                                                                                                                                                                                                                                                                                                                                                                                                                                                                                                                                                                                                                                                                         |
|-------------------------------|-------------------------------------------------------------------------------------------------------------------------------------------------------------------------------------------------------------------------------------------------------------------------------------------------------------------------------------------------------------------------------------------------------------------------------------------------------------------------------------------------------------------------------------------------------------------------------------------------------------------------------------------------------------------------------------------------------------------------------------------------------------------------------------------------------------------------------------------------------------------------------------------------------------------------------------------------------------------------------------------------------------------------------------------------------------------------------------------------------------------------------------------------------------------------------------------------------------------------------------------------------------------------------------------------------------------------------------------------------------------------------------------------------------------------------------------------------------------------------------------------------------------------------------------------------------------------------------------------------------------------------------------------------------------------------------------------------------------------------------------------------------------------------------------------------------------------------------------------------------------------------------------------------------------------------------------------------------------------------------------------------------------------------------------------------------------------------------------------------------------------------------------------------------------------------------------------------------------------|
| Journal:                      | <i>BMJ Paediatrics Open</i>                                                                                                                                                                                                                                                                                                                                                                                                                                                                                                                                                                                                                                                                                                                                                                                                                                                                                                                                                                                                                                                                                                                                                                                                                                                                                                                                                                                                                                                                                                                                                                                                                                                                                                                                                                                                                                                                                                                                                                                                                                                                                                                                                                                             |
| Manuscript ID                 | bmjpo-2021-001327.R1                                                                                                                                                                                                                                                                                                                                                                                                                                                                                                                                                                                                                                                                                                                                                                                                                                                                                                                                                                                                                                                                                                                                                                                                                                                                                                                                                                                                                                                                                                                                                                                                                                                                                                                                                                                                                                                                                                                                                                                                                                                                                                                                                                                                    |
| Article Type:                 | Protocol                                                                                                                                                                                                                                                                                                                                                                                                                                                                                                                                                                                                                                                                                                                                                                                                                                                                                                                                                                                                                                                                                                                                                                                                                                                                                                                                                                                                                                                                                                                                                                                                                                                                                                                                                                                                                                                                                                                                                                                                                                                                                                                                                                                                                |
| Date Submitted by the Author: | 02-Nov-2021                                                                                                                                                                                                                                                                                                                                                                                                                                                                                                                                                                                                                                                                                                                                                                                                                                                                                                                                                                                                                                                                                                                                                                                                                                                                                                                                                                                                                                                                                                                                                                                                                                                                                                                                                                                                                                                                                                                                                                                                                                                                                                                                                                                                             |
| Complete List of Authors:     | <p>Lee, Anne; Brigham and Women's Hospital, Pediatric Newborn Medicine; Harvard Medical School</p> <p>Abate, Firehiwot Workneh; Addis Continental Institute of Public Health</p> <p>Mullany, Luke C.; Johns Hopkins Bloomberg School of Public Health, Department of International Health</p> <p>Baye, Estifanos; Brigham and Women's Hospital, Department of Pediatric Newborn Medicine</p> <p>Berhane, Yoseph Yemane; Addis Continental Institute of Public Health</p> <p>Derebe, Mulatu Melese; Amhara Public Health Institute</p> <p>Eglovitch, Michelle; Brigham and Women's Hospital, Department of Pediatric Newborn Medicine</p> <p>Fasil, Nebiyu; Addis Continental Institute of Public Health</p> <p>Olson, Ingrid; Brigham and Women's Hospital, Department of Pediatric Newborn Medicine</p> <p>Kidane, Workagegnehu Tarekegn; Addis Continental Institute of Public Health</p> <p>Shiferw, Tigest; Addis Continental Institute of Public Health</p> <p>Shiferie, Fisseha; Addis Continental Institute of Public Health</p> <p>Tsegaye, Fitsum; Addis Continental Institute of Public Health</p> <p>Tsegaye, Sitota; Addis Continental Institute of Public Health</p> <p>Yibeltal, Kalkidan; Addis Continental Institute of Public Health</p> <p>Chan, Grace; Boston Children's Hospital, Harvard Medical School, Department of Medical Critical Care; Harvard TH Chan School of Public Health, Department of Epidemiology</p> <p>Christian, Parul; Johns Hopkins Bloomberg School of Public Health, Department of International Health</p> <p>Isanaka, Sheila; Harvard TH Chan School of Public Health, Departments of Nutrition and Global Health and Population</p> <p>Kang, Yunhee; Johns Hopkins Bloomberg School of Public Health, Department of International Health</p> <p>Lu, Chunling; Brigham and Women's Hospital, Division of Global Health Equity; Harvard Medical School, Department of Global Health and Social Medicine</p> <p>Molina, Rose ; Beth Israel Deaconess Medical Center</p> <p>Stojanov, Michele; Harvard Medical School, Department of Obstetrics and Gynecology</p> <p>Van Dyk, Fred; Johns Hopkins Bloomberg School of Public Health, Department of International Health</p> |

1  
2  
3  
4  
5  
6  
7  
8  
9  
10  
11  
12  
13  
14  
15  
16  
17  
18  
19  
20  
21  
22  
23  
24  
25  
26  
27  
28  
29  
30  
31  
32  
33  
34  
35  
36  
37  
38  
39  
40  
41  
42  
43  
44  
45  
46  
47  
48  
49  
50  
51  
52  
53  
54  
55  
56  
57  
58  
59  
60

|           |                                                                                                                                                                                                                                                                                                                                                                                                                       |
|-----------|-----------------------------------------------------------------------------------------------------------------------------------------------------------------------------------------------------------------------------------------------------------------------------------------------------------------------------------------------------------------------------------------------------------------------|
|           | Tadesse, Amare; Addis Continental Institute of Public Health; London School of Hygiene and Tropical Medicine, Department of Infectious Disease Epidemiology<br>Wylie, Blair; Harvard Medical School; Beth Israel Deaconess Medical Center, Department of Obstetrics and Gynecology<br>Worku, Alemayehu; Addis Continental Institute of Public Health<br>Berhane, Yemane; Addis Continental Institute of Public Health |
| Keywords: | Neonatology, Growth                                                                                                                                                                                                                                                                                                                                                                                                   |
|           |                                                                                                                                                                                                                                                                                                                                                                                                                       |

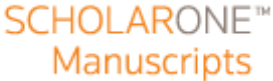



I, the Submitting Author has the right to grant and does grant on behalf of all authors of the Work (as defined in the below author licence), an exclusive licence and/or a non-exclusive licence for contributions from authors who are: i) UK Crown employees; ii) where BMJ has agreed a CC-BY licence shall apply, and/or iii) in accordance with the terms applicable for US Federal Government officers or employees acting as part of their official duties; on a worldwide, perpetual, irrevocable, royalty-free basis to BMJ Publishing Group Ltd ("BMJ") its licensees and where the relevant Journal is co-owned by BMJ to the co-owners of the Journal, to publish the Work in this journal and any other BMJ products and to exploit all rights, as set out in our [licence](#).

The Submitting Author accepts and understands that any supply made under these terms is made by BMJ to the Submitting Author unless you are acting as an employee on behalf of your employer or a postgraduate student of an affiliated institution which is paying any applicable article publishing charge ("APC") for Open Access articles. Where the Submitting Author wishes to make the Work available on an Open Access basis (and intends to pay the relevant APC), the terms of reuse of such Open Access shall be governed by a Creative Commons licence – details of these licences and which [Creative Commons](#) licence will apply to this Work are set out in our licence referred to above.

Other than as permitted in any relevant BMJ Author's Self Archiving Policies, I confirm this Work has not been accepted for publication elsewhere, is not being considered for publication elsewhere and does not duplicate material already published. I confirm all authors consent to publication of this Work and authorise the granting of this licence.

1  
2  
3 **The Enhancing Nutrition and Antenatal Infection Treatment (ENAT) Study:**  
4 **Protocol of a pragmatic clinical effectiveness study to improve birth outcomes in**  
5 **Ethiopia**  
6  
7

8  
9 Anne CC Lee<sup>1,2\*</sup>, Firehiwot Workneh Abate<sup>3</sup>, Luke C. Mullany<sup>4</sup>, Estifanos Baye<sup>1</sup>, Yoseph  
10 Yemane Berhane<sup>3</sup>, Mulatu Melese Derebe<sup>5</sup>, Michelle Eglovitch<sup>1</sup>, Nebiyou Fasil<sup>3</sup>, Ingrid E Olson<sup>1</sup>,  
11 Workagegnehu Tarekegn Kidane<sup>3</sup>, Tigest Shiferw<sup>3</sup>, Fisseha Shiferie<sup>3</sup>, Fitsum Tsegaye<sup>3</sup>, Sitota  
12 Tsegaye<sup>3</sup>, Kalkidan Yibeltal<sup>3</sup>, Grace J. Chan<sup>2,6,7</sup>, Parul Christian<sup>4</sup>, Sheila Isanaka<sup>8</sup>, Yunhee  
13 Kang<sup>4</sup>, Chunling Lu<sup>2,9</sup>, Rose L. Molina<sup>2,10</sup>, Michele D. Stojanov<sup>10</sup>, Fred Van Dyk<sup>4</sup>, Amare Worku  
14 Tadesse<sup>3,11</sup>, Blair J. Wylie<sup>2,9</sup>, Alemayehu Worku<sup>3</sup>, Yemane Berhane<sup>3</sup>  
15

16 <sup>1</sup>Department of Pediatric Newborn Medicine, Brigham and Women's Hospital, Boston, MA, USA

17 <sup>2</sup>Harvard Medical School, Boston, Massachusetts, USA

18 <sup>3</sup>Addis Continental Institute of Public Health, Addis Ababa, Ethiopia

19 <sup>4</sup> Department of International Health, Johns Hopkins Bloomberg School of Public Health,  
20 Baltimore, MD, USA.

21 <sup>5</sup>Amhara Public Health Institute, Bahir Dar, Ethiopia

22 <sup>6</sup>Department of Epidemiology, Harvard T.H. Chan School of Public Health, Boston, MA, USA

23 <sup>7</sup> Department of Medical Critical Care, Boston Children's Hospital, Harvard Medical School,  
24 Boston, Massachusetts, USA

25 <sup>8</sup>Departments of Nutrition and Global Health and Population, Harvard T.H. Chan School of  
26 Public Health, Boston, MA, USA

27 <sup>9</sup> Division of Global Health Equity, Brigham and Women's Hospital, Boston, Massachusetts,  
28 USA

29 <sup>10</sup>Department of Obstetrics and Gynecology, Beth Israel Deaconess Medical Center, Harvard  
30 Medical School, Boston, MA, USA

31 <sup>11</sup>Department of Infectious Disease Epidemiology, London School of Hygiene and Tropical  
32 Medicine, London, UK  
33  
34  
35  
36  
37

38 Corresponding Author:

39 Anne CC Lee

40 75 Francis St, Boston MA 012115

41 617-732-8343

42 Alee6@bwh.harvard.edu  
43

44 Word Count: 4400  
45  
46  
47  
48  
49  
50  
51  
52  
53  
54  
55  
56  
57  
58  
59  
60

## ABSTRACT

**Introduction:** The WHO Nutrition Target aims to reduce the global prevalence of low birth weight 30% by 2025. The Enhancing Nutrition and Antenatal Infection Treatment (ENAT) study will test the impact of packages of pregnancy interventions to enhance maternal nutrition and infection management on birth outcomes in rural Ethiopia.

**Methods and analysis:** ENAT is a pragmatic, open-label, 2x2 factorial, randomised clinical effectiveness study implemented in 12 rural health centers in Amhara, Ethiopia. Eligible pregnant women presenting at antenatal care (ANC) visits at <24 weeks gestation are enrolled (n=2400). ANC quality is strengthened across all centers. Health centers are randomised to receive an enhanced nutrition package (ENP) or standard nutrition care, and within each health center, individual women are randomised to receive an enhanced infection management package (EIMP) or standard infection care. At ENP centers, women receive a regular supply of adequately iodized salt and iron-folate (IFA), enhanced nutrition counseling, and those with mid-upper arm circumference <23 cm receive a micronutrient fortified balanced energy protein supplement (corn soya blend) until delivery. In standard nutrition centers, women receive routine counseling and IFA. EIMP women have additional screening/treatment for urinary and sexual/reproductive tract infections and intensive deworming. Non-EIMP women are managed syndromically per Ministry of Health Guidelines. Participants are followed until 1 month postpartum, and a subset until 6 months. The primary study outcomes are newborn weight and length measured at <72 hours of age. Secondary outcomes include preterm birth, low birthweight, and stillbirth rates; newborn head circumference; infant weight and length for age z-scores at birth; maternal anemia; and weight gain during pregnancy.

**Ethics and dissemination:** ENAT is approved by the Institutional Review Boards of Addis Continental Institute of Public Health (001-A1-2019) and Mass General Brigham (2018P002479). Results will be disseminated to local and international stakeholders.

**ISRCTN Registration:** 15116516

**Funding:** Bill & Melinda Gates Foundation

**Protocol:** Version 4.0 (August 2021)

## Article Summary

What is known about the subject:

- In low- and middle-income countries, maternal undernutrition is prevalent and a major risk factor for adverse birth outcomes, including spontaneous preterm birth, low birth weight and small for gestational age infants.
- Maternal infections in pregnancy are also common, yet under-recognized risk factors for preterm birth and poor fetal growth in low- and middle-income countries.
- Beyond their independent effects, maternal infections and nutritional status may have synergistic effects on fetal growth and gestational length.

What this study hopes to add:

- Increase the evidence-base on the role of antenatal infection management on maternal and birth outcomes in a low resource rural setting in Sub-Saharan Africa.
- Increase the evidence-base on the role of targeted, fortified balanced energy protein supplementation on maternal and birth outcomes in a low resource rural setting Sub-Saharan Africa.
- Evaluate the benefit of developing intervention packages with local stakeholders that are implemented within existing health systems



## INTRODUCTION

The World Health Organization (WHO) Third Global Nutrition Target aims to reduce the proportion of babies born low birthweight (LBW, <2500 grams) by 30% by the year 2025[1]. Approximately 20.5 million infants were born LBW in 2015, with 91% from low-middle income countries (LMIC) and 24% in Sub-Saharan Africa [2]. The main etiologies of low birthweight are preterm birth (<37 gestational weeks) and fetal growth restriction, commonly classified as small-for-gestational-age (SGA) at birth. Preterm and SGA infants carry increased risk of mortality, morbidity, childhood stunting, neurodevelopmental impairment, and adult chronic disease [3–7]. Prevention of preterm birth and SGA is a key public health strategy to improve child survival and health in LMICs.

In LMICs, maternal undernutrition is prevalent and a major risk factor for adverse birth outcomes, including spontaneous preterm birth, LBW and SGA [8,9]. Interventions to improve maternal nutritional status in pregnancy, including iron-folate [10], multiple-micronutrients [11], and balanced protein-energy (BEP) supplementation [12,13], have been individually tested and found to be effective in increasing mean birthweight. However, lower than expected benefit has been observed with the individual nutritional interventions [10,12–14]. Greater effect sizes are noted in undernourished women, and there is a need for additional studies with standardized supplementation criteria as well as the combination of BEP and micronutrient supplementation [12,13].

Maternal infections in pregnancy are also common, yet under-recognized risk factors for preterm birth and poor fetal growth in LMICs. Urinary tract infection or asymptomatic bacteriuria may affect 9-80% of pregnancies in sub-Saharan Africa [15] and are associated with a 2-fold elevated risk of preterm delivery [16]. Helminthic infections are prevalent and associated with systemic inflammation, LBW and preterm birth [17–19]. Genital tract infections may ascend the reproductive tract and lead to infection and inflammation in the amniotic fluid, predisposing to preterm birth [20]. In LMICs, screening and treatment of genitourinary tract infections during routine antenatal care (ANC) is infrequent due to lack of resources and capacity for laboratory testing. While epidemiologic data has consistently established associations between prenatal infections and adverse pregnancy outcomes, there is limited evidence on the effectiveness of prenatal interventions to screen and treat infections to prevent LBW in LMICs.

Beyond their independent effects, maternal infections and nutritional status may have synergistic effects on fetal growth and gestational length [21–25]. Figure 1 depicts several pathways linking maternal nutrition and infections in pregnancy. This framework provides the basis for the hypothesis that targeting both risk factors in pregnancy may lead to more substantial, and potentially synergistic, improvements in fetal growth and pregnancy length [26].

This manuscript details the study protocol for the Enhancing Nutrition and Antenatal Infection Treatment (ENAT) study in Amhara region, Ethiopia. In 2016, WHO released recommendations on an evidence-based, core package of ANC to optimize the pregnancy experience and outcomes [27], include guidelines on nutrition and infection management in pregnancy (Web Table 1). In Ethiopia, not all recommendations have been adopted or achieved high level of coverage or quality in ANC. The primary aim of the ENAT study is to determine the impact of WHO-recommended ANC interventions to optimize maternal nutrition and manage maternal pregnancy infections on infant birth size in Amhara, Ethiopia. We hypothesize that the nutrition and infection management packages will independently increase newborn birth weight and length, and that the combined effect of both packages will be greater than either alone.

## METHODS AND ANALYSIS

### Study Design

The ENAT study is a 2x2 factorial pragmatic, open-label, randomised clinical effectiveness study with cluster randomisation of the enhanced nutrition package (ENP) versus standard care (non-ENP), and individual level randomisation of an enhanced infection management package (EIMP) versus standard care (non-EIMP) (Figure 2).

### Study Setting

The ENAT study site was established in 2018 as a partnership with the Addis Continental Institute of Public Health (ACIPH), Amhara Regional Health Bureau, Amhara Public Health Institute and Brigham and Women's Hospital. The Amhara region has low-resourced health systems and poor health indicators. As per the 2016 Ethiopian Demographic Health Services (EDHS) data, Amhara had the country's highest rates of neonatal mortality (47 per 1000 live births) and LBW (22.2%), and high maternal mortality rate (412 per 100,000 live births) [28].

1  
2  
3 Rates of any prenatal care and institutional delivery and were 82.6% and 54.2%, respectively  
4 [29]. One in four women of reproductive age are underweight (body mass index < 18.5 kg/m<sup>2</sup>)  
5 [28] and geohelminth infections are prevalent, ranging from 21.1-43.5% [30,31].  
6  
7  
8  
9

10 The ENAT study is conducted in 12 rural health centers (each serving ~25,000 population) in  
11 West Gojjam (South and North Achefer districts [woredas]) and South Gondar (Dera and  
12 Libokemem districts) zones, Amhara (Figure 3, Site Map). The districts were chosen in  
13 collaboration with the Amhara Regional Health Bureau based on the high rates of  
14 undernutrition, risk of low birth weight, need for nutritional programs, and proximity to the  
15 regional laboratory. The study health centers were chosen based on accessibility, total ANC  
16 volume (minimum 250 women presenting to ANC/year), and infrastructure (functional  
17 laboratory).  
18  
19  
20  
21  
22  
23

#### 24 **Patient and public involvement**

25  
26 Prior to the study, formative work was conducted with a range of community members (mothers,  
27 families, community and religious leaders, health providers) [32]. This feedback directly  
28 informed the design of the study interventions, packages, and their implementation. Community  
29 sensitization was performed prior to initiating the study.  
30  
31  
32  
33

#### 34 **Study participants and recruitment**

35  
36 Pregnant women are recruited from ANC visits in designated ENAT study health centers. A  
37 study nurse explains study procedures and obtains written informed consent. For illiterate  
38 women, an impartial witness attests to consent and the woman provides a thumbprint.  
39  
40

41 To encourage early presentation at ANC clinics, community sensitization was conducted prior to  
42 study initiation. Study field data collectors and community cadres disseminated information  
43 about the ENAT study at monthly community-based pregnant women's conferences, and  
44 community and religious gatherings and encouraged presentation to the health centers if/as  
45 soon as pregnancy was suspected. Study enrollment began in August 2020 and will continue  
46 until the sample size has been met. As of September 1, 2021 ENAT has enrolled 2,148 women.  
47  
48  
49  
50  
51

#### 52 *Inclusion criteria:*

- 53 • ≤24 weeks gestation based on a clinical algorithm (LMP and/or symphysis fundal height)  
54 who have a viable pregnancy  
55

#### 56 *Exclusion criteria:*

57  
58  
59  
60

- Pregnant women presenting for first ANC >24 weeks
- Pregnant women who live >2 hours walking distance from ENAT health centers
- Pregnant women presenting at first ANC with fetus that is non-viable (without a heartbeat on enrollment ultrasound)

### ENAT Study Interventions

Health systems strengthening of ANC services was performed in ENAT health centers prior to the study to benefit all women receiving care in these facilities. Health systems strengthening was conducted in partnership with Amhara Regional Health Bureau and local partners including Jhpiego. Staff were trained in ANC standards, guidelines, and measurements (blood pressure, gestational age, birth weight [33]). Facilities were stocked with basic equipment, medications, and diagnostic testing. Laboratory capacity was augmented, and all health centers were equipped with ultrasound machines.

#### A. Enhanced Nutrition Package (ENP) (Table 1)

**Table 1: Enhanced Nutrition Package Components**

| ENP Content                        | Activity                                                                                                                                        | Frequency                                                                                                          |
|------------------------------------|-------------------------------------------------------------------------------------------------------------------------------------------------|--------------------------------------------------------------------------------------------------------------------|
| Nutritional education/counseling   | Counseling about healthy eating, adequate pregnancy weight gain, increasing protein and energy in diet, importance of Iron/folate, iodized salt | Every ANC visit (monthly, potentially less frequently pending COVID)                                               |
| Iron-Folic Acid                    | Strengthen counseling, supply and reinforcement of daily IFA (60 mg Fe/400 µg folic acid)                                                       | Provide 90-day supply per FMOH, adherence/counseling at every ANC visit                                            |
| Iodized salt                       | For all pregnant women, provide up to 1kg at enrollment and follow up visit for household use during pregnancy with counseling                  | Provided adequately iodized salt at enrollment, and monthly follow up visits; adherence/counseling every ANC visit |
| Balanced Energy Protein supplement | For pregnant women with MUAC <23 cm, local Corn Soya Blend 200 gm daily supplement (784 kcal/day, 28 g protein)                                 | Daily supplement, distributed at ANC visits (monthly, given COVID may provide longer term supply)                  |

##### *A.1 Nutritional Education/Counseling on Adequate Pregnancy Nutrition and Weight Gain:*

Routine ANC nutrition counseling includes increasing intake and dietary diversity, however, can vary depending on patient load. For ENP centers, supplementary, locally contextualized, counseling was developed based on our formative work [32], and is delivered by midwives. Content includes BMI-based recommended weight gain, dietary diversity, and educational messages developed to address local cultural beliefs related to dietary intake during pregnancy

1  
2  
3 as well as side effects of iron-folate. Nutrition education materials, including posters and videos,  
4 are shown in ENP health centers to promote women's behavior change and maximize their  
5 exposure to various but consistent nutrition messages.  
6  
7

8  
9  
10 *A.2 Iron Folic Acid (IFA)*: The Ethiopian FMOH recommends 60 mg iron plus 400 µg folic acid  
11 supplements, orally once daily in pregnancy. In August-Sept 2019, coverage of IFA was 46.3%  
12 in the ENAT health centers, and our formative work indicated that barriers included local beliefs  
13 about "big babies" and side effects such as constipation. In the ENP health centers, additional  
14 counseling is conducted, utilizing video/media to address common cultural beliefs and side  
15 effects, and women are reminded at each ANC visit about IFA consumption, management of  
16 side effects and provided refills per FMOH guidelines.  
17  
18  
19

20  
21  
22 *A.3 Provision of Adequately Iodized Household Salt*: In ENP centers, we provide a monthly  
23 household supply of high-quality adequately iodized salt at every ANC visit. The iodized salt  
24 (Waff Manufacturing, 30-40 ppm potassium iodate, 600 gm bottle) is packaged in airtight,  
25 resealable, polyethylene containers, to allow resealing after use and to reduce risk of  
26 evaporative losses at the household level. Quality control procedures are in place to ensure that  
27 iodization is in the proper range at production and maintained at distribution sites. Women are  
28 counselled that salt should be used to replace their household salt, on the approximate daily  
29 use (~10 gm (3 pinches)/day), the proper storage of salt (away from light, heat, humidity, re-  
30 capping container after use) and use of salt only after cooking/heating of food.  
31  
32  
33  
34  
35  
36  
37

38 *A.4 Fortified Balanced Energy Protein (BEP) Supplement for Malnourished Women (MUAC <23*  
39 *cm)*: In the ENP health centers, women who have MUAC <23 cm at enrollment, or at any follow  
40 up ANC visit, are provided with a monthly supply of locally produced micronutrient fortified corn  
41 soya flour blend (Super Cereal, Faffa Food Share Company, Addis Ababa, Ethiopia) at every  
42 ANC visit until delivery. The daily corn soya blend (CSB) supplement (200gm) is provided in  
43 addition to normal meals and contains 28 g of protein and 784 kcal (Web Table 2). This protein  
44 composition falls within recommendations that a BEP supplement provide ~50% of the  
45 additional protein requirement in the 3<sup>rd</sup> trimester (range of 28-36g for malnourished  
46 populations) [34]. Micronutrient composition of the provided BEP is also shown in Web Table 2.  
47 The fortified BEP supplement meets the IOM recommended levels in pregnancy [35] for  
48 Vitamins A, D, E, B<sub>2</sub>, B<sub>3</sub>, B<sub>6</sub>, B<sub>12</sub>, C, calcium and phosphorus (see Web Table 2). 35 sachets  
49 (200 gm each) are distributed to women at enrollment and at follow up monthly ANC visits to  
50  
51  
52  
53  
54  
55  
56  
57  
58  
59  
60

allow for additional doses in case she is delayed in returning for ANC and/or for potential family sharing practices.

## B. Enhanced Infection Management Package (EIMP) (Table 2)

Women randomised to the EIMP intervention, receive the following interventions at their first ANC visit >12 weeks.

**B.1 Urinary Tract Infection/Asymptomatic Bacteriuria:** A clean catch midstream urine specimen is collected using a vacutainer with boric acid preservative (Beckton Dickinson). Urine culture and antibiotic susceptibility testing are performed at Amhara Public Health Institute (APHI), the regional laboratory certified by the ENAO (Ethiopian National Accreditation Office) - ISO (International Organization for Standardization) 15189. Antibiotic susceptibility is determined including the Vitek method (bioMerieux, Marcy l'Etoile, France), or Kirby Bauer Disk Diffusion. Urinary tract infections (UTI) are classified in Web Table 3 and treated with an oral antibiotic based on antibiotic sensitivity patterns (Web Table 4). Antibiotics are provided to pregnant women at no cost and the first dose is directly observed. Women with severe illness or difficult to treat infections are referred to the obstetrics department at Feligot Hiwot hospital. Women provide a test of cure specimens at the following ANC visit.

**Table 2. ENAT EIMP Components**

| Infection                                           | ENAT Enhanced Infection Management Package (EIMP) Activity                                                                                                                                                                                                                                                                             |
|-----------------------------------------------------|----------------------------------------------------------------------------------------------------------------------------------------------------------------------------------------------------------------------------------------------------------------------------------------------------------------------------------------|
| Urinary Tract Infection/Asymptomatic Bacteriuria    | <i>Screen:</i> Urine culture and antibiotic sensitivity.<br><i>Treat:</i> Initially per clinical protocol, with targeted antibiotic treatment based on antibiotic resistance patterns.                                                                                                                                                 |
| Sexually Transmitted/ Reproductive Tract Infections | <i>Screen:</i><br>1) <b>ALL pregnant women</b> for gonorrhoea, chlamydia using accurate rapid diagnostic testing for chlamydia and gonorrhoea<br>2) Pregnant women <b>with symptoms</b> are screened for trichomonas and bacterial vaginosis<br><i>Treat:</i> All positive cases and partners (for gonorrhoea, chlamydia, trichomonas) |
| Geo-helminths                                       | Presumptive deworming with mebendazole 500 mg or albendazole 400 mg as per FMOH guideline; Stool screen and treatment for parasitic infections at least 4 weeks after deworming. If positive, treatment for intestinal parasites per FMOH guidelines.                                                                                  |



1  
2  
3 *B.2 Sexually Transmitted/Reproductive Tract Infections:* Women self-collect vaginal  
4 specimens that are tested for gonorrhea and chlamydia using the *Xpert® CT/NG assay*  
5 (*Cepheid, Sunnyvale, CA*), a modular cartridge-based platform for testing each specimen by  
6 nucleic acid amplification at APHI. Chlamydia is treated with Azithromycin 1 gram orally  
7 once and gonorrhea is treated with Ceftriaxone 250 mg IM once + Azithromycin 1gram  
8 orally once. Partner treatment is on a voluntary basis with a regimen as recommended by  
9 the Ethiopian STI management guidelines [36]. A test of cure is obtained at the next ANC  
10 visit.  
11  
12  
13  
14  
15  
16

17 For women who report symptoms of abnormal vaginal discharge, vulvar symptoms, or lower  
18 abdominal tenderness, additional vaginal swabs are collected for trichomonas and bacterial  
19 vaginosis by point of care diagnostics. Trichomonas is tested using the OSOM® trichomonas  
20 rapid test (Sekisui Diagnostics, Lexington, MA). Bacterial vaginosis is tested using  
21 Diagnosit® BVBLUE® test (Gryphus Diagnostics, Knoxville, TN)). Trichomonas is treated with  
22 Metronidazole 2 grams orally once, and partners are treated. Bacterial vaginosis is treated with  
23 metronidazole 500 mg twice daily for 7 days.  
24  
25  
26  
27  
28  
29

30 *B.3. Parasitic Intestinal Infections:* In settings of high geo-helminth burden, WHO  
31 recommends prophylactic deworming in 2nd and 3rd trimester of pregnancy [37]. At study  
32 initiation, mebendazole (500 mg) was provided twice in pregnancy consistent with WHO  
33 guidelines. Due to health provider concerns regarding medication package insert  
34 information contraindicating use in early pregnancy, in September 2020, the protocol was  
35 modified to a single presumptive deworming in the 3rd trimester. With the adoption of new  
36 Ethiopian FMOH ANC guidelines allowing earlier provision of anti-helminthics in pregnancy,  
37 in May 2021, the ENAT protocol was modified to provide presumptive deworming in the 2nd  
38 trimester followed by a stool screening and treatment at least 4 weeks later. In the first post-  
39 deworming visit, stool is screened for intestinal parasites in the health center lab using wet  
40 mount microscopy available at the health center. Women identified with parasitic infections  
41 are treated as per FMOH recommendations (Web Table 4).  
42  
43  
44  
45  
46  
47  
48  
49  
50

### 51 **Randomisation/Allocation**

52 At the first level of randomisation, clusters (i.e., health centers) are randomised into one of  
53 two nutrition interventions: a) ENP or b) standard nutrition care. We performed a  
54 constrained randomisation to ensure balance across the two arms of the study for key  
55  
56  
57  
58  
59  
60

1  
2  
3 indicators including: population size, pre-study ANC coverage rates, number of births, and  
4 travel time to the regional center of Bahir Dar. We: 1) set reasonable tolerance levels for the  
5 restriction variables, 2) created all possible random sequences, where each sequence  
6 allocated 6 health centers to the ENAT Nutrition Package and 6 health centers to routine  
7 care, 3) assessed each sequence as to whether or not it met these restriction criteria, and  
8 4) choose randomly from the subset of all such allocation sequences that met the criteria. At  
9 the second level of randomisation, we randomised individual pregnant women presenting  
10 for ANC at each health center to receive a) *ENAT Enhanced Infection Management*  
11 *Package (EIMP)*, or b) standard infection care (Figure 2). Each health center received a  
12 pre-generated randomisation list of sequential individual assignments to EIMP or standard  
13 care, where assignments were equally allocated to each arm within randomly permuted  
14 blocks of size 4, 8, or 12. The randomisation lists were generated separately, by health  
15 center, using a script written by one of the authors (LCM) in R [38].  
16  
17  
18  
19  
20  
21  
22  
23  
24

### Outcome Measures

The **primary outcomes** are

- P1. Newborn weight measured within 72 hours of birth
- P2. Newborn length measured within 72 hours of birth

The **secondary outcomes** include:

- S1. Length of gestation, with gestational age determined by <24-week pregnancy ultrasonography
- S2. Proportion of pregnancies resulting in spontaneous preterm delivery
- S3. Proportion of newborns born of low birthweight (<2500 grams), as measured within 72 hours of life
- S4. Proportion of newborns born small-for-gestational age, as defined by the INTERGROWTH 21st neonatal birth weight standard.
- S5. Stillbirth rate
- S6. Newborn head circumference within 72 hours of birth
- S7. Infant Z-scores for weight-for-age, length-for-age, head circumference-for-age within 72 hours of birth
- S8. Maternal gestational weight gain
- S9. Maternal anemia (3rd trimester)

The definitions used for each outcome measure is shown in Table 3.



**Table 3: ENAT Study Outcomes**

| Primary outcomes                                                           |                                                                                                                                                                                                                                                                                                                                                                                                                                             |
|----------------------------------------------------------------------------|---------------------------------------------------------------------------------------------------------------------------------------------------------------------------------------------------------------------------------------------------------------------------------------------------------------------------------------------------------------------------------------------------------------------------------------------|
| <b>P1. Newborn weight &lt;72 hours of birth</b>                            | Weight of the unclothed infant measured at <72 hours of life                                                                                                                                                                                                                                                                                                                                                                                |
| <b>P2. Newborn length measured at birth</b>                                | Infant Length measured at <72 hours of life                                                                                                                                                                                                                                                                                                                                                                                                 |
| Secondary outcomes                                                         |                                                                                                                                                                                                                                                                                                                                                                                                                                             |
| <b>S1. Gestational age</b>                                                 | Gestational age determined by enrollment ultrasound, CRL used if <95 mm (Intergrowth 21st), then BPD/FL (WHO Kiserud) used if CRL>95 mm or missing                                                                                                                                                                                                                                                                                          |
| <b>S2a. Proportion of pregnancies resulting in preterm delivery</b>        | Numerator: number of pregnancies resulting in spontaneous termination of pregnancy from 24 to <37 weeks (including preterm live birth or fetal loss (spontaneous pregnancy loss 24 to <37 weeks, not due to induced abortion)).<br>Denominator: All pregnancy outcomes $\geq 24$ weeks                                                                                                                                                      |
| <b>S2b. Preterm live birth</b>                                             | Numerator: Live births <37 weeks of gestation<br>Denominator: All Livebirths                                                                                                                                                                                                                                                                                                                                                                |
| <b>S3. Small for Gestational Age<sup>a</sup> (Intergrowth)</b>             | <10% birthweight for GA by sex compared to Intergrowth reference <sup>2</sup>                                                                                                                                                                                                                                                                                                                                                               |
| <b>S4. Low birthweight rate</b>                                            | Low birthweight is defined as birthweight (measured within the first 72 h of life) of <2500 g. We will also assess the outcome of birthweight <2000 g.                                                                                                                                                                                                                                                                                      |
| <b>S5. Stillbirth rate</b>                                                 | Numerator: Stillbirth ( $\geq 28$ weeks gestation)- fetal death with no signs of life<br><i>A preterm stillbirth is defined as an infant born without signs of life (no spontaneous crying, breathing, and/or movement) at 28 to &lt;37 weeks gestation.</i><br><i>A term stillbirth is defined as an infant born without signs of life at <math>\geq 37</math> wks</i><br><br>Denominator: All live births and stillbirths $\geq 28$ weeks |
| <b>S6. Newborn head circumference</b>                                      | Head circumference of the infant measured at <72 hours of age                                                                                                                                                                                                                                                                                                                                                                               |
| <b>S7. Newborn weight, length, and head circumference for age Z-scores</b> | Infant weight, length, and head circumference for age z-scores measured at <72 hours of life, calculated using the Intergrowth reference for size at birth.                                                                                                                                                                                                                                                                                 |
| <b>S8. Rate of weight gain in pregnancy</b>                                | Maternal weight gain (kg) per week gestation in the 2nd and 3rd trimester                                                                                                                                                                                                                                                                                                                                                                   |
| <b>S9. Maternal anemia</b>                                                 | Mean hemoglobin concentration in 3 <sup>rd</sup> trimester (Mission hemoglobinometer)                                                                                                                                                                                                                                                                                                                                                       |

<sup>a</sup>Abbreviations: WHO, World Health Organization; UTI, urinary tract infection; ANC, antenatal care; SGA, small-for-gestational-age; GA, gestational age

### Data Collection

The timeline of individual participant study visits, measurements and data collection are shown in Table 4. All study visits are conducted at the health center, with the exception of the birth visit

1  
2  
3 that may be conducted at home within 72 hours of delivery, for births occurring at home or  
4 outside of the study area. Adherence monitoring visits also occur at the home for those  
5 participants who do not return to the health center for follow up.  
6  
7

8  
9 The core of the data collection system is the Survey Solutions platform (World Bank, v20.08,  
10 2021). Study nurses enter data directly into electronic tablets with programmed validity checks  
11 during study visits. Paper forms are used if tablets are temporarily unavailable. The tablets are  
12 regularly synchronized to the server on the ACIPH campus. A web-based dashboard supports  
13 data collectors, supervisors, and investigators in real time management and monitoring of study  
14 activities.  
15  
16  
17  
18  
19  
20  
21  
22  
23  
24  
25  
26  
27  
28  
29  
30  
31  
32  
33  
34  
35  
36  
37  
38  
39  
40  
41  
42  
43  
44  
45  
46  
47  
48  
49  
50  
51  
52  
53  
54  
55  
56  
57  
58  
59  
60

Table 4. Participant timeline schedule of enrolment, interventions, assessment, and visits

|                                      |                        | STUDY PERIOD    |          |      |      |           |         |
|--------------------------------------|------------------------|-----------------|----------|------|------|-----------|---------|
|                                      |                        | Post-allocation |          |      |      |           |         |
|                                      |                        | Allocation      | Prenatal |      |      | Postnatal |         |
| TIMEPOINT                            | Enrolment<br><24 weeks | ANC1            | ANC2     | ANC3 | etc. | Birth     | 1 month |
| <b>ENROLMENT:</b>                    |                        |                 |          |      |      |           |         |
| Eligibility screen                   | X                      |                 |          |      |      |           |         |
| Informed consent                     | X                      |                 |          |      |      |           |         |
| Allocation                           | X                      |                 |          |      |      |           |         |
| <b>INTERVENTIONS:</b>                |                        |                 |          |      |      |           |         |
| ENP                                  | X                      | X               | X        | X    | X    |           |         |
| EIMP                                 | X                      | X               | X        | X    | X    |           |         |
| ENP + EIMP                           | X                      | X               | X        | X    | X    |           |         |
| <b>ASSESSMENTS:</b>                  |                        |                 |          |      |      |           |         |
| <b>MOTHERS</b>                       |                        |                 |          |      |      |           |         |
| US (fetal growth & GA determination) | X                      |                 |          | X    |      |           |         |
| Basic medical & obstetric history    | X                      |                 |          |      |      |           |         |
| Socioeconomic status                 | X                      |                 |          |      |      |           |         |
| Health care costs                    | X                      |                 | X        |      |      |           |         |
| Food insecurity and Dietary Intake   | X                      | X               |          | X    |      |           |         |
| Maternal stress and depression       |                        | X               |          | X    |      |           | X       |
| Maternal anthropometrics             | X                      | X               | X        | X    | etc. | X         | X       |
| Maternal morbidity                   | X                      | X               | X        | X    | etc. | X         | X       |
| Labor and Delivery characteristics   |                        |                 |          |      |      | X         |         |
| Assessment of home environment       |                        |                 |          |      |      | X         |         |
| <b>INFANTS</b>                       |                        |                 |          |      |      |           |         |
| Anthropometrics                      |                        |                 |          |      |      | X         | X       |
| Breast feeding practices             |                        |                 |          |      |      | X         | X       |
| Morbidity and mortality              |                        |                 |          |      |      | X         | X       |

### *Enrollment Visit*

At the enrollment visit at the health center, data is collected on the participant's socio-economic status, basic medical and obstetric history, pregnancy history, maternal morbidity including COVID-19, food security, and dietary intake. A dietary quality questionnaire is administered, which has been used in the Ethiopian context [39].

A basic abdominal obstetric ultrasound is performed by a trained research nurse at the enrollment visit for pregnancy dating. An intensive ultrasonography training and standardization was performed by General Electric, Ethiopian Radiography Association and sonographers from Beth Israel Deaconess Hospital (Boston, MA). Sonographers measure crown-rump length, bi-parietal diameter (outer to inner), head circumference, femoral length, abdominal circumference in duplicate. Approximately 10% of images are externally reviewed (MS, BJW) for quality control.

Maternal and infant anthropometrics are measured by research staff (nurses, data collectors) at baseline and follow up visits (Table 3). Maternal weight is measured with a digital scale (ADE M317600, Germany; precision 100 gm) and height is measured using an adult stadiometer (Shorr Productions HeightLite). All measurements are performed twice, with a third measurement done if the difference is greater than the minimal acceptable difference defined by Intergrowth 21 [40]. Nurses and data collectors are trained and standardized in anthropometric measurements at the start of the study and every 6 months.

### *Follow up ANC Visits*

During the follow up ANC visits at the health center, research staff interview women about their health status, morbidity, pregnancy history/complications, counselling/services received, maternal mental health screen, and dietary intake. Data is abstracted from routine ANC records, including blood pressure, lab testing results, and management. Maternal weight and mid-upper arm circumference are measured. In a subset of women, a semi-quantitative food frequency questionnaire for ~70 food items is administered at ANC visits. Hemoglobin is measured during enrollment in the 1st or 2<sup>nd</sup> and 3<sup>rd</sup> trimester ANC visits (Hemocue 301c). Venous hemoglobin is measured if blood is already being drawn for other purposes, and otherwise capillary hemoglobin is measured.

1  
2  
3 Adherence to each nutritional supplement is assessed at every ANC visit. The participant is  
4 asked to bring the used IFA bottle, salt container, and BEP sachets back to the health  
5 center at each ANC visit. Pill or empty sachet count is done, and the salt container weighed.  
6 The participant is also asked to recall the number of sachets and/or pills that were taken in  
7 the last 7 days, and since the last visit. For mothers who do not attend scheduled ANC  
8 visits, a home visit is made by a data collector to assess adherence and conduct pill/sachet  
9 counts and remind the mother to return for ANC and study visits.  
10  
11  
12  
13  
14

15  
16 A repeat ultrasound is performed in the 3<sup>rd</sup> trimester to monitor fetal growth and assess the  
17 position of the baby. If the fetus is determined to be in non-vertex positioning at the 3<sup>rd</sup>  
18 trimester scan, the nurse recommends that the women deliver in the nearest hospital with  
19 Cesarean section capacity.  
20  
21  
22

### 23 *Birth Visit*

24  
25 Participants who deliver in health facilities are assessed by research staff based in health  
26 centers or hospitals as soon as possible after birth, but within 72 hours of life. Data is gathered  
27 from women and from chart review about the delivery and immediate postpartum period.  
28 Medical records are reviewed for intrapartum course (e.g., vital signs, duration of labor), delivery  
29 complications, and maternal/neonatal morbidity. For deliveries that occur at home, a home visit  
30 is made by research staff as soon as possible upon birth notification (within 72 hours). Maternal  
31 history is obtained per self-report regarding delivery history/complications, and postpartum  
32 maternal/neonatal morbidity.  
33  
34  
35  
36  
37  
38

39  
40 Infant weight is measured using a high quality, precise digital infant scale (ADE M112600,  
41 Germany; precision 5 gm). Infant length is measured using a portable infantometer  
42 (Perspective Enterprises PE-RILB-LTWT, Michigan USA, precision 1 mm). Recumbent  
43 length is recorded to the last completed (not the nearest) mm. Head, chest, and mid upper  
44 arm circumferences (MUAC) is measured to the nearest millimeter (mm) using insertion  
45 tapes (Shorr productions, Maryland USA). Daily calibration checks are made before each  
46 use of infant weighing scales, and length boards to ensure accuracy of measurement  
47 [41,42].  
48  
49  
50  
51

### 52 *Postnatal Visit*

1  
2  
3 Postnatal visits are made at 4-6 weeks for all participants to collect data on maternal and  
4 infant vital status, health, morbidity and anthropometrics. Visits are conducted primarily at  
5 the health center, and home visits are made for those who do not return for follow up. For  
6 infants who follow up at the health center for routine postnatal care or immunizations, study  
7 visits are additionally conducted at 3 and 6 months.  
8  
9  
10

### 11 12 *Cost Data*

13  
14 Data regarding the costs of delivery of the ENAT study interventions is collected in all study  
15 arms. Costs of interventions include three components: system-level costs, costs incurred by  
16 health workers for participating in the interventions, and costs incurred by individual patients and  
17 families. At the system level, costs are captured using the World Health Organization (WHO)  
18 framework [43] using modified survey tools based on our published survey instruments, cost  
19 estimation protocols, and procedures that have been validated and used in other LMICs (e.g.,  
20 Rwanda, India) [44–46]; Costs incurred by health workers for receiving training include time or  
21 money spent for participating in training sessions. For all time spent, monetary value is assigned  
22 based on their average hourly wage. Costs incurred by patients include costs or time spent for  
23 received care or home visits. For visits in health facilities, we collect self-reported cost data from  
24 patients.  
25  
26  
27  
28  
29  
30  
31  
32

33 *Biospecimens:* In a subset of consenting women, additional biospecimens will be collected for  
34 future analysis. These specimens are shown in Web Table 5.  
35  
36  
37

### 38 **Statistical Analysis**

39  
40 Data collected in this study will enable us to conduct a comprehensive analysis of the impact of  
41 interventions randomized at the health center and individual level. The Detailed Statistical  
42 Analysis Plan (SAP) of the ENAT study is published separately at:  
43 <https://addiscontinental.edu.et/>. In brief, our statistical approach will have multiple steps. We  
44 will describe the health centers and pregnant women enrolled in the study and conduct a  
45 descriptive quantitative analysis of variables at multiple levels to assess the degree to which our  
46 randomization scheme resulted in similar sub-populations of pregnant women. We will assess  
47 the receipt of and adherence to interventions offered, conduct descriptive analyses of the  
48 primary and secondary outcomes, compare the outcomes between intervention groups, assess  
49 potential effect modifiers, and conduct pre-specified sub-group analysis.  
50  
51  
52  
53  
54  
55  
56  
57  
58  
59  
60

## Sample Size

We have estimated the effect size detectable with 80% power under a cluster-randomised design, with 6 health centers per study arm. Fixing recruitment of pregnant women to 18 months, we estimated that within this time period the average health center in the proposed study site would enroll around 200 women into ANC at  $\leq 24$  weeks gestation, and would yield 112 live born infants weighed within 72 hours of life (assuming ~70% of enrolled pregnancies result in a live birth, and ~80% are followed up and weighed within 72 hours). Beyond the above determination of average cluster size, we have additionally made the following assumptions in order to estimate effect sizes detectable with 80% power: 1) mean birthweight and standard deviation as per prior studies in Gondor (mean birth weight of 2900 gm, SD 450gm) and 2) variation in distribution of weight between clusters as reflected through an coefficient of variation ( $k=0.01$ ) [47]. In total this includes 2,400 pregnant mothers enrolled in 12 health centers, resulting in 1,440 live births with a birthweight within 72 hours. This sample size provides 80% power to detect a 66 gram difference in birthweight between the ENAT EIMP or routine care group in a marginal analysis (i.e. irrespective of whether mothers did or did not receive the ENP), and a 90 gm difference between ENP vs routine care (marginal analysis).

*Length.* With the assumptions of clusters and enrollment above, we assumed mean infant length of 49.5 cm (SD 2.4) (based on the Malawi LAIS study [48,49] and coefficient of variation  $k=0.008$  (sector level variation in JiVitA study) [47]. For the EIMP vs. routine care comparison, we would have 80% power to detect a 3.0 mm difference in mean infant length. For the ENP vs. non-ENP comparison (marginal analysis) we would have 80% power to detect a 7.8 mm difference in infant length between the women receiving the package of enhanced nutrition-infection compared to standard nutrition care.

## Study Monitoring

An external Study Monitoring Committee (SMC) is established to monitor the progress of the study, including enrollment, progress indicators and adverse events. The SMC includes an independent Ethiopian obstetrician (Dr. Delayehu Bekele) and an epidemiologist (Professor Simon Cousens). The committee met before study initiation, at mid-enrollment, and every 6 months to review study progress. Interim analysis will not be performed.



## ETHICS AND DISSEMINATION

**Research Ethics approval:** The ENAT protocol was approved at Addis Continental Institute of Public Health (001-A1-2019) and Mass General Brigham Institutional Review Board (2018P002479). The APHI granted local permission to conduct the study.

The study is registered at ISRCTN (ISRCTN15116516). Protocol modifications will be communicated to respective IRBs and ISRCTN.

### Confidentiality

All the data collected for this study is kept strictly confidential at Addis Continental Institute of Public Health on a local encrypted server. Personal identifiers are not used in study-specific forms, aside from the identifier module. Paper copies of data forms for data entry and analysis are stored in a locked file when not in use. Access to data files containing personal identifying information is limited to the principal investigators and key staff.

### Ancillary care

ENAT project helps cover ancillary care related to study participation that is not covered by the health system.

### Dissemination plan

ENAT study findings will be disseminated to FMOH, APHI, ARHB, Zonal health departments, woreda health offices, community representatives, and to other relevant stakeholders. Involving relevant stakeholders in the dissemination process will help to enhance ownership of the research output and the ultimate integration of findings into programs. The dissemination will be in the form of presentations in workshops, conferences, and symposiums at local, regional, national, and international levels as appropriate. In addition, reports and peer-review journal publications will be produced.

## DISCUSSION

Despite the high global burden of low birthweight, preterm birth and fetal growth restriction, few interventions have demonstrated efficacy or effectiveness in the prevention of these adverse birth outcomes. Novel, integrated approaches are needed to make more substantial, scalable and sustainable impacts in order to meet the WHO's Nutrition targets. A critical feature of the ENAT study is its health systems approach and involvement of key local stakeholders in the design of intervention packages and implementation. The packaging/bundling of interventions



1  
2  
3 aims to maximize their potential impact, cost-effectiveness, learning, and future scalability. This  
4 study will provide important evidence on the role of strengthening ANC programs to improve  
5 maternal health and birth outcomes, and will help inform future ANC policies in Ethiopia. ENAT  
6 will contribute to the growing body of knowledge regarding the effectiveness of BEP  
7 supplementation during pregnancy. Secondly, despite the high burden of antenatal infections,  
8 there is limited high-quality evidence that interventions to treat prenatal infections improves birth  
9 outcomes. To our knowledge, there is even more limited data on the interactions of nutrition  
10 and infections in pregnancy and this study will provide novel new insight on the potential for  
11 synergistic benefits of an integrated approach. Finally, the study will generate implementation  
12 learning on how to optimize delivery of WHO guidelines in resource limited health systems.  
13  
14  
15  
16  
17  
18  
19  
20

### 21 **Access to data**

22 The final dataset will be available to the ENAT investigative team and collaborators.  
23 Anonymized study data may be made available upon request to the study PIs in accordance  
24 with Ethiopian and US regulatory guidelines.  
25  
26

### 27 **Declaration of interests**

#### 28 *Financial and competing interests of the PIs*

29 ACL reports funding from the Bill & Melinda Gates Foundation, Eunice Kennedy Shriver  
30 National Institute of Child Health and Human Development and the World Health Organization.  
31 YB reports funding from FORMAS, USAID, National Institute of Environmental Health Sciences  
32 and from the Bill & Melinda Gates Foundation. BJW reports funding from National Institute of  
33 Environmental Health Sciences and from the Bill & Melinda Gates Foundation.  
34  
35  
36

37 **Funding Statement:** This work was supported by the Bill & Melinda Gates Foundation grant  
38 number OPP1184363. The funder provided input on the study design, but played no role in the data  
39 collection, data analysis, interpretation of data, writing of the report or decision to submit the report for  
40 publication.  
41  
42

### 43 **Acknowledgements**

44 We would like to thank the ENAT partners for their support and contributions to the study,  
45 including the Amhara Regional Health Bureau, Amhara Public Health Institute, Ethiopian  
46 Federal Ministry of Health, Ethiopian Society of Obstetrics and Gynecology, General Electric,  
47 Ethiopian Society of Radiology, and Jhpiego. We acknowledge the Child Investment Fund who  
48 supported Jhpiego health systems strengthening efforts in study areas. We would also like to  
49 thank our Study Monitoring Committee, Dr. Delayehu Bekele and Professor Simon Cousens.  
50  
51

### 52 **Author Contributions**

53 Wrote manuscript: ACL, LCM, FW, ME, YB

54 Designed study/protocol: ACL, FW, LCM, EB, ME, GC, PC, SI, CL, RM, AWT, BJW, AQ, YB  
55  
56  
57  
58  
59  
60

1  
2  
3 Designed study materials/study tools: ACL, FW, EB, YB, MD, ME, NF, IO, WK, TS, FS, FT, ST,  
4 KY, SI, YK, CL, RM, MS, FV, AWT, YB  
5 Trained field data collectors: FW, EB, YB, MD, ME, WK, TS, FS, FT, ST, KY, AWT, ACL, YB  
6 Designed Data management system: NF, FS, FT, FV, AW  
7 Trained ultrasonography: MS, BW, KY, ST  
8 Critically reviewed/revised manuscript: all authors  
9 All authors have met ICJME criteria.  
10  
11  
12  
13  
14  
15  
16  
17  
18  
19

## 20 **FIGURE CAPTIONS**

21  
22  
23 **Figure 1. Conceptual diagram showing the pathways that link maternal undernutrition,**  
24 **maternal infection, and infant outcomes** (A, B, and C represent mechanisms, which are  
25 described in detail in the associated sections above)  
26

27 **Figure 2. ENAT Study Consort Diagram**

28  
29 **Figure 3. ENAT Study Site Map, Amhara Region, Ethiopia**  
30  
31  
32  
33  
34  
35  
36  
37  
38  
39  
40  
41  
42  
43  
44  
45  
46  
47  
48  
49  
50  
51  
52  
53  
54  
55  
56  
57  
58  
59  
60

## REFERENCES

- 1 World Health Organization. Global nutrition targets 2025: low birth weight policy brief. Geneva, Switzerland: 2014.
- 2 Blencowe H, Krusevec J, de Onis M, *et al*. National, regional, and worldwide estimates of low birthweight in 2015, with trends from 2000: a systematic analysis. *Lancet Glob Health* 2019;**7**:e849–60. doi:10.1016/S2214-109X(18)30565-5
- 3 Katz J, Lee AC, Kozuki N, *et al*. Mortality risk in preterm and small-for-gestational-age infants in low-income and middle-income countries: a pooled country analysis. *Lancet* 2013;**382**:417–25. doi:10.1016/S0140-6736(13)60993-9
- 4 Christian P, Lee SE, Donahue Angel M, *et al*. Risk of childhood undernutrition related to small-for-gestational age and preterm birth in low- and middle-income countries. *Int J Epidemiol* 2013;**42**:1340–55. doi:10.1093/ije/dyt109
- 5 Blencowe H, Lee ACC, Cousens S, *et al*. Preterm birth-associated neurodevelopmental impairment estimates at regional and global levels for 2010. *Pediatr Res* 2013;**74 Suppl 1**:17–34. doi:10.1038/pr.2013.204
- 6 Murray E, Fernandes M, Fazel M, *et al*. Differential effect of intrauterine growth restriction on childhood neurodevelopment: a systematic review. *BJOG* 2015;**122**:1062–72. doi:10.1111/1471-0528.13435
- 7 Danaei G, Andrews KG, Sudfeld CR, *et al*. Risk factors for childhood stunting in 137 developing countries: A comparative risk assessment analysis at global, regional, and country levels. *PLoS Med* 2016;**13**:e1002164. doi:10.1371/journal.pmed.1002164
- 8 Han Z, Mulla S, Beyene J, *et al*. Maternal underweight and the risk of preterm birth and low birth weight: a systematic review and meta-analyses. *Int J Epidemiol* 2011;**40**:65–101. doi:10.1093/ije/dyq195
- 9 Kozuki N, Katz J, Lee ACC, *et al*. Short Maternal Stature Increases Risk of Small-for-Gestational-Age and Preterm Births in Low- and Middle-Income Countries: Individual Participant Data Meta-Analysis and Population Attributable Fraction. *J Nutr* 2015;**145**:2542–50. doi:10.3945/jn.115.216374
- 10 Peña-Rosas JP, De-Regil LM, Garcia-Casal MN, *et al*. Daily oral iron supplementation during pregnancy. *Cochrane Database Syst Rev* 2015;:CD004736. doi:10.1002/14651858.CD004736.pub5

- 1  
2  
3 11 Keats EC, Neufeld LM, Garrett GS, *et al.* Improved micronutrient status and  
4 health outcomes in low- and middle-income countries following large-scale  
5 fortification: evidence from a systematic review and meta-analysis. *Am J Clin Nutr*  
6 2019;**109**:1696–708. doi:10.1093/ajcn/nqz023  
7  
8  
9 12 Imdad A, Bhutta ZA. Maternal nutrition and birth outcomes: effect of balanced  
10 protein-energy supplementation. *Paediatr Perinat Epidemiol* 2012;**26 Suppl**  
11 **1**:178–90. doi:10.1111/j.1365-3016.2012.01308.x  
12  
13 13 Ota E, Hori H, Mori R, *et al.* Antenatal dietary education and supplementation to  
14 increase energy and protein intake. *Cochrane Database Syst Rev*  
15 2015;:CD000032. doi:10.1002/14651858.CD000032.pub3  
16  
17  
18 14 Buppasiri P, Lumbiganon P, Thinkhamrop J, *et al.* Calcium supplementation  
19 (other than for preventing or treating hypertension) for improving pregnancy and  
20 infant outcomes. *Cochrane Database Syst Rev* 2011;:CD007079.  
21 doi:10.1002/14651858.CD007079.pub2  
22  
23  
24 15 Gilbert NM, O'Brien VP, Hultgren S, *et al.* Urinary tract infection as a preventable  
25 cause of pregnancy complications: opportunities, challenges, and a global call to  
26 action. *Glob Adv Health Med* 2013;**2**:59–69. doi:10.7453/gahmj.2013.061  
27  
28  
29 16 Romero R, Oyarzun E, Mazor M, *et al.* Meta-analysis of the relationship between  
30 asymptomatic bacteriuria and preterm delivery/low birth weight. *Obstet Gynecol*  
31 1989;**73**:576–82.  
32  
33 17 Honkpéhèdji YJ, Adegbite BR, Zinsou JF, *et al.* Association of low birth weight  
34 and polyparasitic infection during pregnancy in Lambaréné, Gabon. *Trop Med Int*  
35 *Health* 2021;**26**:973–81. doi:10.1111/tmi.13591  
36  
37  
38 18 Aderoba AK, Iribhogbe OI, Olagbuji BN, *et al.* Prevalence of helminth infestation  
39 during pregnancy and its association with maternal anemia and low birth weight.  
40 *Int J Gynaecol Obstet* 2015;**129**:199–202. doi:10.1016/j.ijgo.2014.12.002  
41  
42  
43 19 Abioye AI, McDonald EA, Park S, *et al.* Maternal, placental and cord blood  
44 cytokines and the risk of adverse birth outcomes among pregnant women  
45 infected with *Schistosoma japonicum* in the Philippines. *PLoS Negl Trop Dis*  
46 2019;**13**:e0007371. doi:10.1371/journal.pntd.0007371  
47  
48  
49 20 Goldenberg RL, Hauth JC, Andrews WW. Intrauterine infection and preterm  
50 delivery. *N Engl J Med* 2000;**342**:1500–7. doi:10.1056/NEJM200005183422007  
51  
52 21 Christensen DL, Kapur A, Bygbjerg IC. Physiological adaption to maternal  
53 malaria and other adverse exposure: low birth weight, functional capacity, and  
54 possible metabolic disease in adult life. *Int J Gynaecol Obstet* 2011;**115 Suppl**  
55 **1**:S16-9. doi:10.1016/S0020-7292(11)60006-4  
56  
57  
58  
59  
60

- 1  
2  
3 22 Krawinkel MB. Interaction of nutrition and infections globally: an overview. *Ann Nutr Metab* 2012;**61 Suppl 1**:39–45. doi:10.1159/000345162  
4  
5  
6  
7 23 Vohr BR, Poggi Davis E, Wanke CA, *et al.* Neurodevelopment: The Impact of  
8 Nutrition and Inflammation During Preconception and Pregnancy in Low-  
9 Resource Settings. *Pediatrics* 2017;**139**:S38–49. doi:10.1542/peds.2016-2828F  
10  
11 24 Kim H, Hwang JY, Ha EH, *et al.* Association of maternal folate nutrition and  
12 serum C-reactive protein concentrations with gestational age at delivery. *Eur J*  
13 *Clin Nutr* 2011;**65**:350–6. doi:10.1038/ejcn.2010.267  
14  
15  
16 25 Kutlesic V, Brewinski Isaacs M, Freund LS, *et al.* Executive Summary: Research  
17 Gaps at the Intersection of Pediatric Neurodevelopment, Nutrition, and  
18 Inflammation in Low-Resource Settings. *Pediatrics* 2017;**139**:S1–11.  
19 doi:10.1542/peds.2016-2828C  
20  
21  
22 26 Collin SM, Baggaley RF, Pittrof R, *et al.* Could a simple antenatal package  
23 combining micronutritional supplementation with presumptive treatment of  
24 infection prevent maternal deaths in sub-Saharan Africa? *BMC Pregnancy*  
25 *Childbirth* 2007;**7**:6. doi:10.1186/1471-2393-7-6  
26  
27 27 World Health Organization (WHO). WHO recommendations on antenatal care for  
28 a positive pregnancy experience. 2016.  
29  
30  
31 28 Central Statistical Agency CSAE, Icf. Ethiopia Demographic and Health Survey  
32 2016. Addis Ababa, Ethiopia: : CSA and ICF 2017.  
33  
34 29 Ethiopia Mini Demographic and Health Survey 2019: Key indicators. Rockville,  
35 Maryland, USA: EPHI and ICF: : Ethiopian Public Health Institute (EPHI)  
36 [Ethiopia] and ICF 2019.  
37  
38  
39 30 Shiferaw MB, Zegeye AM, Mengistu AD. Helminth infections and practice of  
40 prevention and control measures among pregnant women attending antenatal  
41 care at Anbesame health center, Northwest Ethiopia. *BMC Res Notes*  
42 2017;**10**:274. doi:10.1186/s13104-017-2609-6  
43  
44  
45 31 Belyhun Y, Medhin G, Amberbir A, *et al.* Prevalence and risk factors for soil-  
46 transmitted helminth infection in mothers and their infants in Butajira, Ethiopia: a  
47 population based study. *BMC Public Health* 2010;**10**:21. doi:10.1186/1471-2458-  
48 10-21  
49  
50  
51 32 Workneh F, Eglovitch M, Shiferaw T, *et al.* Dietary practices among pregnant  
52 women in rural amhara, ethiopia. *Curr Dev Nutr* 2021;**5**:698–698.  
53 doi:10.1093/cdn/nzab045\_080  
54  
55  
56  
57  
58  
59  
60

- 1  
2  
3 33 Baye E, Abate FW, Eglovitch M, *et al.* Effect of birthweight measurement quality  
4 improvement on low birthweight prevalence in rural Ethiopia. *Popul Health Metr*  
5 2021;**19**:35. doi:10.1186/s12963-021-00265-0  
6  
7  
8 34 Members Of An Expert Consultation On Nutritious Food Supplements For  
9 Pregnant And Lactating Women. Framework and specifications for the nutritional  
10 composition of a food supplement for pregnant and lactating women (PLW) in  
11 undernourished and low income settings. *Gates Open Res* Published Online  
12 First: 2019. doi:10.21955/gatesopenres.1116379.1  
13  
14  
15 35 Institute of Medicine. Dietary Reference Intakes (DRIs): Recommended Dietary  
16 Allowances and Adequate Intakes. Washington, DC: The National Academies  
17 Press  
18  
19  
20 36 Federal Democratic Republic of Ethiopia Ministry of Health. National Guidelines  
21 for the Management of Sexually Transmitted Infections Using Syndromic. Addis  
22 Ababa, Ethiopia: 2015.  
23  
24  
25 37 World Health Organization. Soil-transmitted helminth infections.  
26 2020. [https://www.who.int/news-room/fact-sheets/detail/soil-transmitted-helminth-](https://www.who.int/news-room/fact-sheets/detail/soil-transmitted-helminth-infections)  
27 [infections](https://www.who.int/news-room/fact-sheets/detail/soil-transmitted-helminth-infections) (accessed 8 Sep2021).  
28  
29  
30 38 R Core Team. *R: A language and environment for statistical computing*. Vienna,  
31 Austria: R Foundation for Statistical Computing 2021.  
32  
33 39 Workicho A, Belachew T, Feyissa GT, *et al.* Household dietary diversity and  
34 Animal Source Food consumption in Ethiopia: evidence from the 2011 Welfare  
35 Monitoring Survey. *BMC Public Health* 2016;**16**:1192. doi:10.1186/s12889-016-  
36 3861-8  
37  
38 40 International Fetal and Newborn Growth Consortium. The International Fetal and  
39 Newborn Growth Standards for the 21st Century(INTERGROWTH-21st) Study  
40 Protocol. 2009.  
41  
42  
43 41 de Onis M, Onyango AW, Borghi E, *et al.* Comparison of the World Health  
44 Organization (WHO) Child Growth Standards and the National Center for Health  
45 Statistics/WHO international growth reference: implications for child health  
46 programmes. *Public Health Nutr* 2006;**9**:942–7. doi:10.1017/phn20062005  
47  
48  
49 42 Bloem M. The 2006 WHO child growth standards. *BMJ* 2007;**334**:705–6.  
50 doi:10.1136/bmj.39155.658843.BE  
51  
52 43 The world health report 2000 - Health systems: improving performance. Geneva,  
53 Switzerland: : World Health Organization 2000.  
54  
55  
56  
57  
58  
59  
60



- 1  
2  
3 44 Lu C, Tsai S, Ruhumuriza J, *et al.* Tracking rural health facility financial data in  
4 resource-limited settings: a case study from Rwanda. *PLoS Med*  
5 2014;**11**:e1001763. doi:10.1371/journal.pmed.1001763  
6  
7  
8 45 Tsai S, Umugiraneza G, Ruhumuriza J, *et al.* Training manual on tracking  
9 financial data in health facilities in Kayonza and Kirehe. Boston, MA: : Program in  
10 Global Health Economics and Social Change, Harvard Medical School 2013.  
11  
12 46 Lu C, Tsai S, Ruhumuriza J, *et al.* Obtaining financing data for local health  
13 facilities in two districts of Rwanda: General guidelines. Boston, MA: : Program in  
14 Global Health Economics and Social Change, Harvard Medical School 2013.  
15  
16  
17 47 West KP, Shamim AA, Mehra S, *et al.* Effect of maternal multiple micronutrient  
18 vs iron-folic acid supplementation on infant mortality and adverse birth outcomes  
19 in rural Bangladesh: the JiVitA-3 randomized trial. *JAMA* 2014;**312**:2649–58.  
20 doi:10.1001/jama.2014.16819  
21  
22  
23 48 Luntamo M, Kulmala T, Mbewe B, *et al.* Effect of repeated treatment of pregnant  
24 women with sulfadoxine-pyrimethamine and azithromycin on preterm delivery in  
25 Malawi: a randomized controlled trial. *Am J Trop Med Hyg* 2010;**83**:1212–20.  
26 doi:10.4269/ajtmh.2010.10-0264  
27  
28  
29 49 Luntamo M, Kulmala T, Cheung YB, *et al.* The effect of antenatal monthly  
30 sulphadoxine-pyrimethamine, alone or with azithromycin, on foetal and neonatal  
31 growth faltering in Malawi: a randomised controlled trial. *Trop Med Int Health*  
32 2013;**18**:386–97. doi:10.1111/tmi.12074  
33  
34  
35  
36  
37  
38  
39  
40  
41  
42  
43  
44  
45  
46  
47  
48  
49  
50  
51  
52  
53  
54  
55  
56  
57  
58  
59  
60

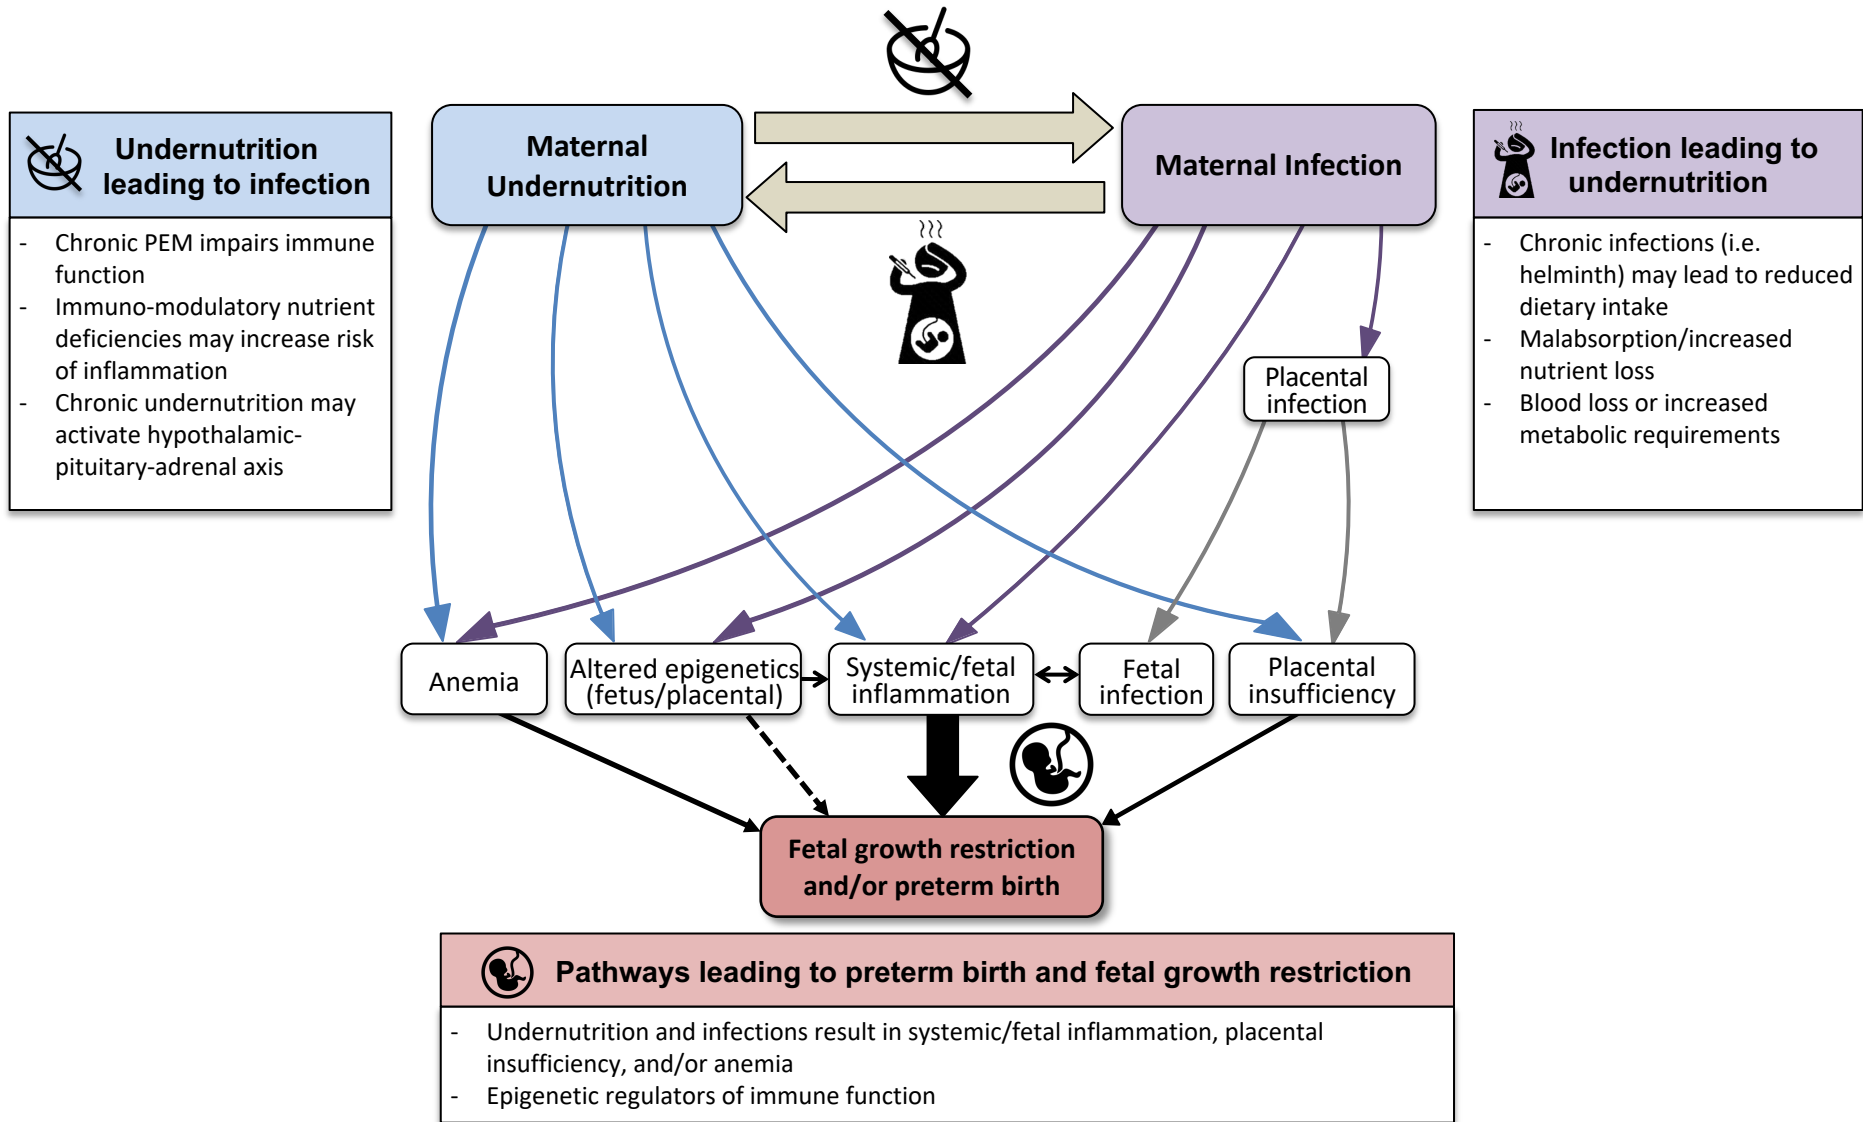



1  
2  
3  
4  
5  
6  
7  
8  
9  
10  
11  
12  
13  
14  
15  
16  
17  
18  
19  
20  
21  
22  
23  
24  
25  
26  
27  
28  
29  
30  
31  
32  
33  
34  
35  
36  
37  
38  
39  
40  
41  
42  
43  
44  
45  
46  
47  
48  
49  
50  
51  
52  
53  
54  
55  
56  
57  
58  
59  
60

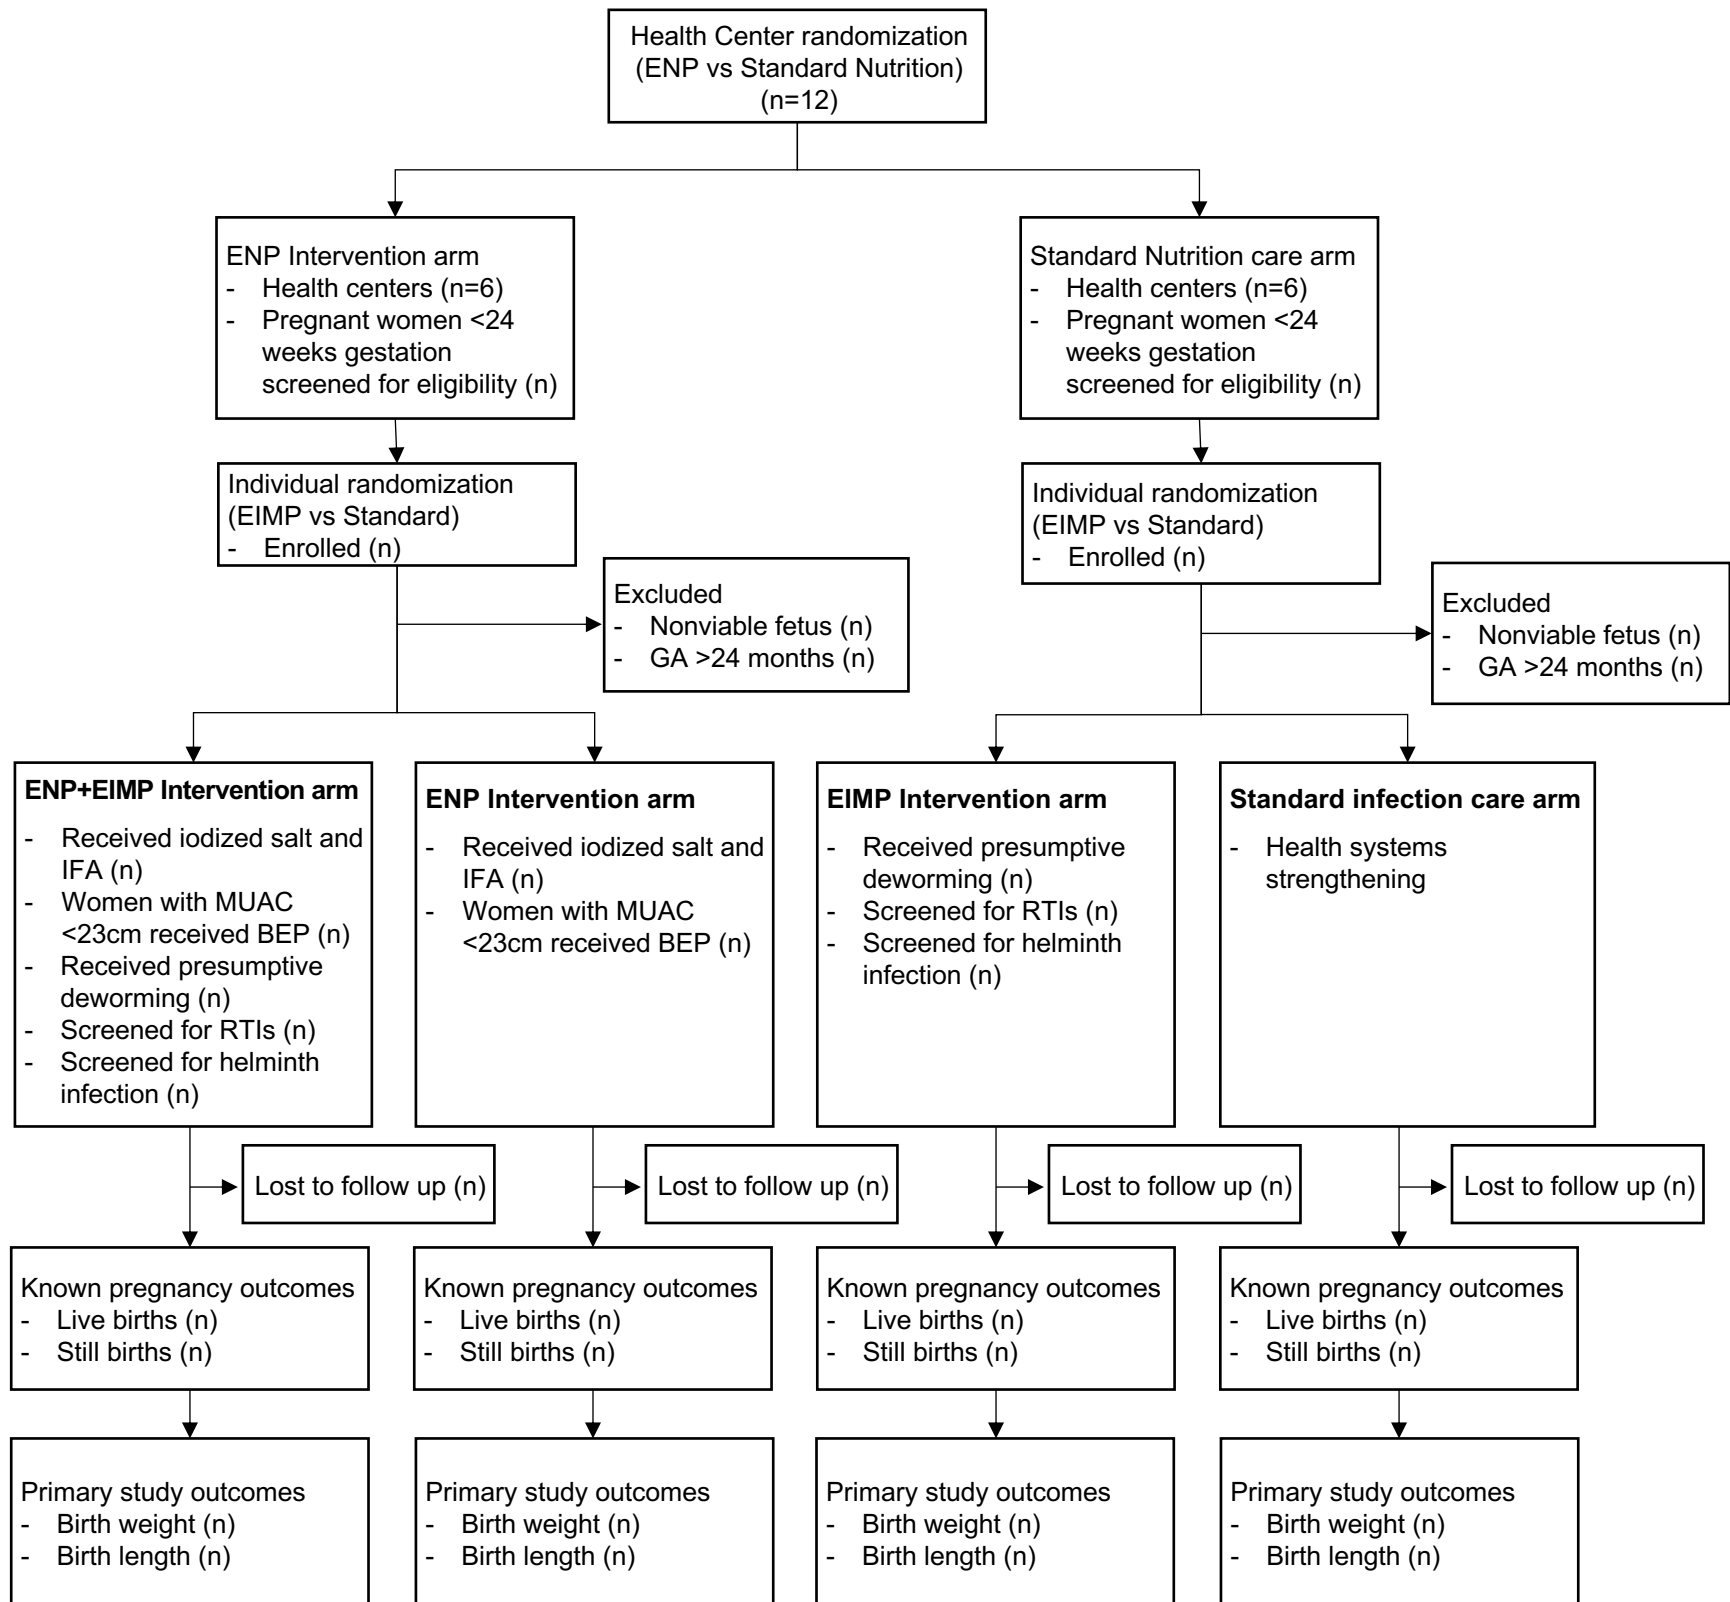

1  
2  
3  
4  
5  
6  
7  
8  
9  
10  
11  
12  
13  
14  
15  
16  
17  
18  
19  
20  
21  
22  
23  
24  
25  
26  
27  
28  
29  
30  
31  
32  
33  
34  
35  
36  
37  
38  
39  
40  
41

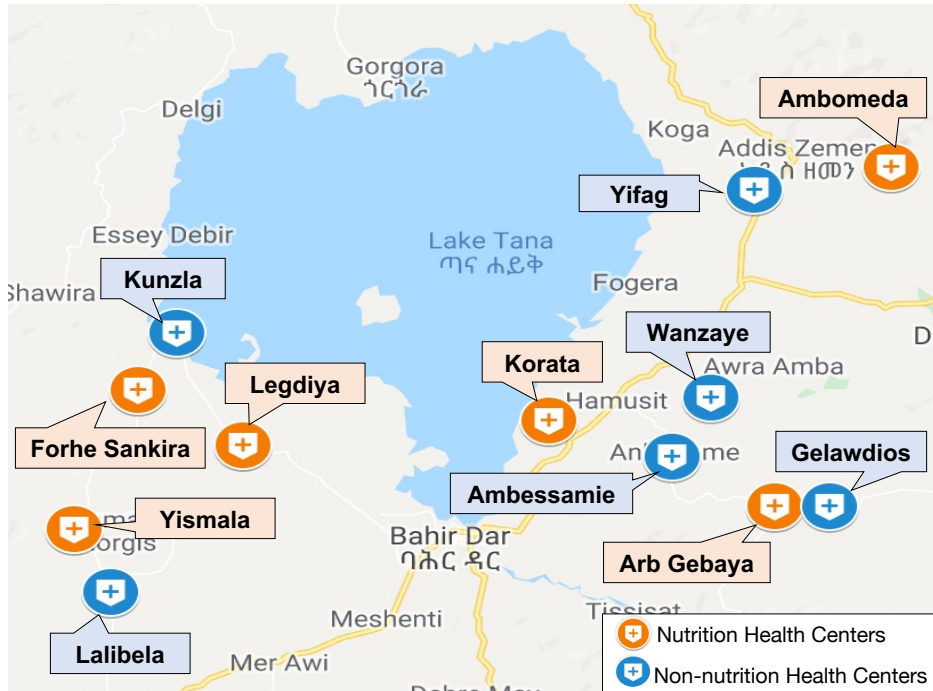

## WEBAPPENDIX

Web Table 1. WHO Recommendations for Antenatal Care

| Nutritional Interventions                                                                                                                                                                                                                                                                                                                                       |                                            |
|-----------------------------------------------------------------------------------------------------------------------------------------------------------------------------------------------------------------------------------------------------------------------------------------------------------------------------------------------------------------|--------------------------------------------|
| A.1.1: Counselling about healthy eating and keeping physically active during pregnancy is recommended for pregnant women to stay healthy and to prevent excessive weight gain during pregnancy.                                                                                                                                                                 | Recommended                                |
| A.1.2: In undernourished populations, nutrition education on increasing daily energy and protein intake is recommended for pregnant women to reduce the risk of low-birth-weight neonates.                                                                                                                                                                      | Context-specific recommendation            |
| A.1.3: In undernourished populations, balanced energy and protein dietary supplementation is recommended for pregnant women to reduce the risk of stillbirths and small-for-gestational-age neonates.                                                                                                                                                           | Context-specific recommendation            |
| A.2.1: Daily oral iron and folic acid supplementation with 30 mg to 60 mg of elemental iron and 400 µg (0.4 mg) of folic acid is recommended for pregnant women to prevent maternal anaemia, puerperal sepsis, low birth weight, and preterm birth.                                                                                                             | Recommended                                |
| A.2.2: Intermittent oral iron and folic acid supplementation with 120 mg of elemental iron and 2800 µg (2.8 mg) of folic acid once weekly is recommended for pregnant women to improve maternal and neonatal outcomes if daily iron is not acceptable due to side-effects, and in populations with an anaemia prevalence among pregnant women of less than 20%. | Context-specific recommendation            |
| A.3: In populations with low dietary calcium intake, daily calcium supplementation (1.5–2.0 g oral elemental calcium) is recommended for pregnant women to reduce the risk of pre-eclampsia.                                                                                                                                                                    | Context-specific recommendation            |
| A.4: Vitamin A supplementation is only recommended for pregnant women in areas where vitamin A deficiency is a severe public health problem, to prevent night blindness.                                                                                                                                                                                        | Context-specific recommendation            |
| A.5: Zinc supplementation for pregnant women is only recommended in the context of rigorous research.                                                                                                                                                                                                                                                           | Context-specific recommendation (research) |
| A.10: For pregnant women with high daily caffeine intake (more than 300 mg per day), lowering daily caffeine intake during pregnancy is recommended to reduce the risk of pregnancy loss and low-birth-weight neonates.                                                                                                                                         | Context-specific recommendation            |
| Maternal Assessment                                                                                                                                                                                                                                                                                                                                             |                                            |
| B.1.1: Full blood count testing is the recommended method for diagnosing anaemia in pregnancy. In settings where full blood count testing is not available, on-site haemoglobin testing with a haemoglobinometer is recommended over the use of the haemoglobin colour scale as the method for diagnosing anaemia in pregnancy.                                 | Context-specific recommendation            |
| B.1.2: Midstream urine culture is the recommended method for diagnosing asymptomatic bacteriuria (ASB) in pregnancy. In settings where urine culture is not available, on-site midstream urine Gram-staining is recommended over the use of dipstick tests as the method for diagnosing ASB in pregnancy.                                                       | Context-specific recommendation            |
| B.2.4: One ultrasound scan before 24 weeks of gestation (early ultrasound) is recommended for pregnant women to estimate gestational age, improve detection of fetal anomalies and multiple pregnancies, reduce induction of labour for post-term pregnancy, and improve a woman's pregnancy experience.                                                        | Recommended                                |
| Preventive Measures                                                                                                                                                                                                                                                                                                                                             |                                            |
| C.1: A seven-day antibiotic regimen is recommended for all pregnant women with asymptomatic bacteriuria (ASB) to prevent persistent bacteriuria, preterm birth and low birth weight.                                                                                                                                                                            | Recommended                                |
| C.2: Antibiotic prophylaxis is only recommended to prevent recurrent urinary tract infections in pregnant women in the context of rigorous research.                                                                                                                                                                                                            | Context-specific recommendation (research) |
| C.4: In endemic areas, preventive anthelmintic treatment is recommended for pregnant women after the first trimester as part of worm infection reduction programmes.                                                                                                                                                                                            | Context-specific recommendation            |

**Web Table 2. Super Cereal Corn Soya Blend Composition (per daily 200 gm serving)**

| NUTRIENT    | Units  | ENAT CSB CONTENT (200 gm) | Recommended Target*             |
|-------------|--------|---------------------------|---------------------------------|
| Energy      | Kcal   | 760                       | 250-500kcal per daily serving** |
| Protein     | gm     | 28                        | 14-18 g**                       |
| Fat         | %      | 12%                       | 10-60% of energy                |
| Vitamin A   | mcg RE | 2076                      | 550-770***                      |
| Vitamin D   | mcg    | 22.1                      | 10-15                           |
| Vitamin E   | mg     | 16.6                      | 16-19                           |
| Vitamin K   | mcg    | 60                        | 72-90                           |
| Vitamin B1  | mg     | 0.4                       | 1.2-1.4                         |
| Vitamin B2  | mg     | 2.8                       | 1.3-1.6                         |
| Vitamin B3  | mg     | 16                        | 14-18                           |
| Folic Acid  | mcg    | 220                       | 400-600                         |
| Vitamin B6  | mg     | 2.0                       | 1.7-2.0                         |
| Vitamin C   | mg     | 180                       | 100-120                         |
| Calcium     | mg     | 724                       | 500-1500                        |
| Iron        | mg     | 8                         | 22-27                           |
| Iodine      | mcg    | 80                        | 209-290                         |
| Phosphorous | mg     | 560                       | 300-700                         |
| Zinc        | mg     | 10                        | 15-20                           |

\* Targets are results of an Expert Consultation held at Bill and Melinda Gates Foundation. [50]

\*\* Energy balance from macronutrient: portion size can be doubled in settings of high energy gaps, such as maternal malnutrition and where prevalence of low birthweight is high.

\*\*\* Micronutrient recommendations were primarily based upon Institute of Medicine (IOM) estimated average requirement (EAR) and recommended dietary allowances (RDA) values.

Web Table 3. Classification of UTI in ENAT study

| <b>UTI Terminology</b>                        | <b>Definition</b>                                                                                                                                                                                                                                     |
|-----------------------------------------------|-------------------------------------------------------------------------------------------------------------------------------------------------------------------------------------------------------------------------------------------------------|
| <b><i>High-burden growth</i></b>              | bacteriuria of $>10^5$ colony forming units (CFU) per 1mL of urine of a single uropathogen [49],                                                                                                                                                      |
| <b><i>Intermediate growth</i></b>             | bacteriuria with $>10^3$ - $10^5$ CFU/mL of a single uropathogen,                                                                                                                                                                                     |
| <b><i>Contamination</i></b>                   | bacterial growth of $\geq 3$ micro-organism OR growth of a non-urinary tract pathogen.                                                                                                                                                                |
| <b><i>UTI symptoms</i></b>                    | dysuria, urinary frequency, urinary urgency, hematuria, abdominal pain, fever, OR flank pain                                                                                                                                                          |
| <b><i>Symptomatic intermediate growth</i></b> | women with intermediate burden growth and UTI symptoms (as above)                                                                                                                                                                                     |
| <b><i>Asymptomatic bacteriuria</i></b>        | women with high burden bacterial growth without UTI symptoms                                                                                                                                                                                          |
| <b><i>Cystitis</i></b>                        | women with positive urine culture (high burden or intermediate growth) and symptoms of dysuria, urinary frequency, hematuria, urinary urgency or suprapubic tenderness, without upper urinary tract symptoms (fever, chills, flank or back pain) [49] |
| <b><i>Pyelonephritis</i></b>                  | women with positive urine culture and systemic symptoms (fever, chills, flank pain or back pain) [49].                                                                                                                                                |

**Web Table 4. Recommended Treatments for Parasitic Stool Infections  
FMHACA Standard Treatment Guideline, 3<sup>rd</sup> Edition 2014**

| Intestinal parasite                                                                                       | Recommended treatment, and alternative                                                                                                                               |
|-----------------------------------------------------------------------------------------------------------|----------------------------------------------------------------------------------------------------------------------------------------------------------------------|
| <b><i>Entamoeba Histolytica</i></b>                                                                       | Metronidazole 500 mg P.O. TID x 5-7 days                                                                                                                             |
| <b><i>Giardia lamblia</i></b>                                                                             | Tinidazole 2 gm po single dose<br>Or Alternative:<br>Metronidazole 500 mg po TID x 5 days                                                                            |
| <b>Ascariasis</b><br><b><i>Ascaris lumbricoids</i></b>                                                    | Mebendazole, 500mg P.O. once or<br>Albendazole, 400mg P.O. as a single dose<br>Or Alternative:<br>Pyrantel pamoate, 700mg P.O. as a single dose                      |
| <b>Hookworm infestation</b><br><b><i>Necator americanus</i> or</b><br><b><i>Ancylostoma duodenale</i></b> | Mebendazole, 500mg stat or 100mg P.O. BID for 3 days<br>Albendazole, 400mg P.O. as a single dose<br>Or Alternative:<br>Pyrantel pamoate, 700mg P.O. as a single dose |
| <b>Enterobiasis</b><br><b><i>Enterobius Vermicularis</i></b>                                              | Mebendazole, 100mg P.O. BID for 3 days or<br>Or Alternative:<br>Albendazole, 400mg P.O. as a single dose                                                             |
| <b>Trichuriasis</b><br><b><i>T.tricur</i> [Whipworm]</b>                                                  | Mebendazole, 500mg P.O. single dose or,<br>Or Alternative:<br>Albendazole, 400mg, P.O. for three days                                                                |
| <b>Taeniasis</b><br><b><i>T.saginata</i> or <i>T.solium</i></b>                                           | Praziquantel P.O. 600mg or 10mg/Kg, single dose<br>Or Alternative:<br>Niclosamide, 2g in a single dose P.O.                                                          |
| <b><i>Hymenolepis nana</i></b>                                                                            | Praziquantel, 25mg/kg or 1800mg P.O. single dose<br>Alternative:<br>Niclosamide, 2g P.O. on the first day followed by 1g QD for 6 days                               |
| <b><i>Schistosoma Mansoni</i></b>                                                                         | Praziquantel P.O. 1200 mg single dose (or 600 mg po in 2 doses)                                                                                                      |
| <b>Strongyloidiasis</b><br><b><i>Strongloidexs</i></b><br><b><i>stercolaries</i></b>                      | Albendazole 400mg P.O. BID for three consecutive days.                                                                                                               |

## Web Table 5. Biological Specimens Collected in ENAT Study

A table of biospecimens and planned lab testing is presented below. Biospecimens collected for immediate analyses at the APHI laboratory are stored at room temperature using special collection containers and swabs designed to meet this storage requirement. Samples collected for future analyses are aliquoted to appropriate containers and stored at APHI for long term storage in a specially procured freezer for this purpose. All samples are stored for up to 5 years.

### ENAT Bio-specimens

| Biospecimen               | N (Total) | Planned lab testing                                                             | Antenatal |            | Post-natal |         |
|---------------------------|-----------|---------------------------------------------------------------------------------|-----------|------------|------------|---------|
|                           |           |                                                                                 | ≤24 wks   | ~30-34 wks | 0 -<72 hrs | 1-2 mo. |
|                           |           |                                                                                 | Enroll    | ANCFU2     | Birth      | 1-2 mo. |
| Maternal urine            | 800       | Culture, subset of 600 for iodine concentration, selenium, environmental toxins |           |            |            |         |
| Maternal vaginal swab     | 150       | STI/RTI                                                                         |           |            |            |         |
| Maternal blood serum      | 700       | Nutrient levels, TORCH infections                                               |           |            |            |         |
| blood spot                | 1000      | Inflammation, thyroid, nutrients, miRNAs                                        |           |            |            |         |
| VAMS + DBS                | 120       | metabolomics, proteomics                                                        |           |            |            |         |
| Maternal vaginal swab     | 150       | Microbiome, metabolome                                                          |           |            |            |         |
| Maternal stool            | 120       | Microbiome                                                                      |           |            |            |         |
| Maternal oral sample      | 120       | Microbiome                                                                      |           |            |            |         |
| Umbilical cord blood/spot | 650       | Inflammation, thyroid, nutrients, miRNAs                                        |           |            |            |         |
| Infant blood (VAMS + DBS) | 120       | Metabolomics, Proteomics                                                        |           |            |            |         |
| Infant stool              | 160       | Microbiome                                                                      |           |            |            |         |
| Infant oral sample        | 100       | Microbiome, CMV                                                                 |           |            |            |         |
| Breast milk               | 100       | Nutrient composition, microbiome                                                |           |            |            |         |

## Web Form 1. Model Informed Consent Form

### Information sheet and Consent: ENP Arm

**Name of the organization:** Addis Continental Institute of Public Health

**Name of the Sponsor:** Bill and Melinda Gates Foundation and Brigham and Women's Hospital

Good morning/Good afternoon.

My name is \_\_\_\_\_. I am a study nurse at Addis Continental Institute of Public Health (ACIPH). ACIPH is doing the ENAT study together with the Federal Ministry of Health, Amhara Regional Health Bureau, Amhara Public Health Institute, and other partners.

**Purpose:** We are asking you to become part of a research study that has a goal to improve the health of the pregnant women and their babies. The main goal of the study is to see if babies will grow better in the womb if pregnant women are provided with better nutrition and are treated for infections in pregnancy. Pregnant women will be enrolled if they are less than 6 months pregnant and will be followed up to 6 months after the baby's birth. The total number of pregnant women enrolled in this study will be 3,600.

**Explanation of study procedures:**

We will measure your height, weight, and middle upper arm circumference. If your middle-upper arm circumference is  $>23$  cm, you will be given iodized salt and iron folate to be consumed daily until you deliver your baby. Whenever you come to the health center, a midwife will give nutrition counseling about nutrients in IFA and iodized salt and maintaining appropriate weight gain during pregnancy for you and your baby.

If the study nurse finds that your arm size is small (middle upper arm circumference  $<23$  cm), you will also be provided a nutritious food supplement of a corn soy blend flour. You may use the corn soy blend to make a daily serving to take on each day. These supplements will be given to you at the health center once a month until you give birth. We believe this will give the unborn baby the nutrition s/he needs to grow better.

We also hope that treating infections in pregnancy will help you to have a healthier pregnancy, increase the chances that the baby will deliver at the expected due date, and help the baby grow better in the womb.

If you decide to participate in the study, you will be put into one of two groups. The study team will choose which group you will be put into randomly. There is no way to tell which group you will be in. Neither you, the study staff, nor the health workers can choose what group you will be in. You will have an equal chance of being placed in either of the two group.

If you are assigned to the first group, you will be tested and treated for certain infections. You will be given deworming medication during the second trimester of your pregnancy, and you will be asked to provide a stool sample to screen and treat for persistent helminthiasis (worms) in the



1  
2  
3 third trimester. You also be asked to give a sample of your urine to test for infection that may  
4 affect your health and the health of the baby. The study nurse and laboratory personnel will  
5 demonstrate to you how to collect the sample. The urine sample will be analyzed at APHI and  
6 you will be asked to come back to the health center within 7 days to get results from your tests.  
7

8  
9 If you are not in the first group, you will receive the routine antenatal care that is provided at the  
10 health center. You will not receive any additional testing or treatment.  
11

12 After your baby is born, we will need to very carefully measure your baby's height, weight,  
13 chest, head and arm size. It is important these measurements happen within three days of giving  
14 birth. Even if you give birth at home, a trained person will visit you to carefully take them. We  
15 may also measure your baby at a later study visits at 1, 3, and 6 months.  
16

17  
18 We ask for your permission to be contacted during the study to remind you of study visits, to  
19 notify you that your test results have arrived, visit you in case of birth at home and/or to allow us  
20 to come to your house to measure the level of iodine in the salt that you use for household  
21 consumption. We will remind you about your visit by phone call or text message. If you do not  
22 respond, we may visit your home. Please show below how you agree to be contacted:  
23

- 24  Text message (to you or a family member with a phone)  
25  
26  Phone call (to you or a family member with a phone)  
27  
28  Home visit (If you do not come to the facility for your visit, a study staff may visit you at  
29 your home.)  
30  
31

32  
33 Participants for these activities are pregnant women, less than 6 months pregnant, who come for  
34 ANC at health centers at the study site during the study period. If you are willing to be a part of  
35 the study, you need to understand and sign this form. All your personal information for this study  
36 will be kept private in our office where no one will be able to see it. Your identity will not be  
37 used in any reports or publications that come from the study.  
38

39  
40 **Risk or discomforts:** You may feel embarrassed or nervous answering some questions about  
41 your health and your baby's health. You do not have to answer every question if you do not want  
42 to.  
43

44 There also maybe risk of aside effect to a medication. If you are treated for an infection, all of  
45 the medicines that will be given by your midwife are routine and considered safe to have while  
46 pregnant and are not known to hurt the baby.  
47

48  
49 We will give you our phone number so that you can call us with any concerns about bad  
50 reactions to any of the medications. We will help you to be seen and treated at the health center  
51 or nearby hospital and help pay the cost of treatment or transportation if it's absolutely  
52 necessary.  
53

54  
55 **Benefits:** All mothers who join in the study will get an ultrasound and at the third trimester (28  
56 weeks of GA), that will help make sure your pregnancy is healthy. You will be screened for  
57  
58  
59

1  
2  
3 anemia, get iodized salt that may help you to be more nourished and help your baby grow. If you  
4 have poor nutrition, you will get a corn soy blend flour containing nutrients to eat every day.  
5 This supplement may also help improve your and your baby's nutrition during the pregnancy.  
6

7  
8 Some mothers will be tested for infections and get treatment that will help your and your baby's  
9 health. Though you may not get money or gifts, being a part of the study is very important in  
10 making programs that can help mother and child health, especially in helping babies grow and  
11 develop better in the womb.  
12

13  
14 **Confidentiality and Anonymity:** Information about you that we will collect by this research  
15 project will be kept. Your personal information will not be seen by anyone except the study  
16 team, and it will only be used for this research. No identities will be used in any reports or  
17 publications resulting from the study.  
18

19  
20 **Right to Refuse or Withdraw:** Being a part of this study and everything you are asked to do is  
21 completely voluntary. You have the full right to refuse from being a part of this study. You also  
22 have the full right to stop being a part of this study at any time you wish to. Refusing to be in the  
23 study or stopping will not affect the services that you get from the health facility.  
24

25 We thank you very much for your time. If you have any questions, you can call:

26 **Professor Yemane Berhane:** Addis Continental Institute of Public Health,

27 Tel: +251 114 168207/ + 251 911219785 (mobile)

28 E-mail: yemaneberhane@addiscontinental.edu.et OR yemaneberhane@gmail.com  
29

30  
31 **Addis Continental Institute of Public Health,** Tel: +251 116 390039

32 E-mail: aciphaddis@gmail.com  
33  
34  
35  
36  
37  
38  
39  
40  
41  
42  
43  
44  
45  
46  
47  
48  
49  
50  
51  
52  
53  
54  
55  
56  
57  
58  
59  
60

**Consent Form**

I have read this information and decided to be a part of this study. The general purpose of study has been explained well to me and I was given the chance to ask questions. I understand that I can stop my participation and anything for the study at any time.

|                        |                       |                 |
|------------------------|-----------------------|-----------------|
| _____                  | _____                 | _____           |
| Participants name      | Participants age      | ENAT Study ID   |
| _____                  | _____                 |                 |
| Participants signature | Date (DD/MM/YY)       |                 |
| _____                  | _____                 | _____           |
| Study nurse name       | Study nurse signature | Date (DD/MM/YY) |

**If illiterate:**

I have seen the careful reading of the consent form to the potential participant and the participant has been able to ask questions. I agree that the participant has given consent freely.

|                                                                                             |                       |                 |
|---------------------------------------------------------------------------------------------|-----------------------|-----------------|
| _____                                                                                       | _____                 | _____           |
| Witness name                                                                                | Witness signature     | Date (DD/MM/YY) |
| _____                                                                                       | _____                 | _____           |
| Participants name                                                                           | Participants age      | ENAT Study ID   |
| <div style="border: 1px solid black; width: 100px; height: 50px; margin: 10px auto;"></div> |                       |                 |
| Thumb print of participant                                                                  | Date (DD/MM/YY)       |                 |
| _____                                                                                       | _____                 | _____           |
| Study nurse name                                                                            | Study nurse signature | Date (DD/MM/YY) |

1  
2  
3 **The Enhancing Nutrition and Antenatal Infection Treatment (ENAT) Study:**  
4 **Protocol of a pragmatic clinical effectiveness study to improve birth outcomes in**  
5 **Ethiopia**  
6  
7

8  
9 Anne CC Lee<sup>1,2\*</sup>, Firehiwot Workneh Abate<sup>3</sup>, Luke C. Mullany<sup>4</sup>, Estifanos Baye<sup>1</sup>, Yoseph  
10 Yemane Berhane<sup>3</sup>, Mulatu Melese Derebe<sup>5</sup>, Michelle Eglovitch<sup>1</sup>, Nebiyou Fasil<sup>3</sup>, Ingrid E Olson<sup>1</sup>,  
11 Workagegnehu Tarekegn Kidane<sup>3</sup>, Tigest Shiferw<sup>3</sup>, Fisseha Shiferie<sup>3</sup>, Fitsum Tsegaye<sup>3</sup>, Sitota  
12 Tsegaye<sup>3</sup>, Kalkidan Yibeltal<sup>3</sup>, Grace J. Chan<sup>2,6,7</sup>, Parul Christian<sup>4</sup>, Sheila Isanaka<sup>8</sup>, Yunhee  
13 Kang<sup>4</sup>, Chunling Lu<sup>2,9</sup>, Rose L. Molina<sup>2,10</sup>, Michele D. Stojanov<sup>10</sup>, Fred Van Dyk<sup>4</sup>, Amare Worku  
14 Tadesse<sup>3,11</sup>, Blair J. Wylie<sup>2,9</sup>, Alemayehu Worku<sup>3</sup>, Yemane Berhane<sup>3</sup>  
15

16 <sup>1</sup>Department of Pediatric Newborn Medicine, Brigham and Women's Hospital, Boston, MA, USA

17 <sup>2</sup>Harvard Medical School, Boston, Massachusetts, USA

18 <sup>3</sup>Addis Continental Institute of Public Health, Addis Ababa, Ethiopia

19 <sup>4</sup> Department of International Health, Johns Hopkins Bloomberg School of Public Health,  
20 Baltimore, MD, USA.

21 <sup>5</sup>Amhara Public Health Institute, Bahir Dar, Ethiopia

22 <sup>6</sup>Department of Epidemiology, Harvard T.H. Chan School of Public Health, Boston, MA, USA

23 <sup>7</sup> Department of Medical Critical Care, Boston Children's Hospital, Harvard Medical School,  
24 Boston, Massachusetts, USA

25 <sup>8</sup>Departments of Nutrition and Global Health and Population, Harvard T.H. Chan School of  
26 Public Health, Boston, MA, USA

27 <sup>9</sup> Division of Global Health Equity, Brigham and Women's Hospital, Boston, Massachusetts,  
28 USA

29 <sup>10</sup>Department of Obstetrics and Gynecology, Beth Israel Deaconess Medical Center, Harvard  
30 Medical School, Boston, MA, USA

31 <sup>11</sup>Department of Infectious Disease Epidemiology, London School of Hygiene and Tropical  
32 Medicine, London, UK  
33  
34  
35  
36  
37

38 Corresponding Author:

39 Anne CC Lee

40 75 Francis St, Boston MA 012115

41 617-732-8343

42 Alee6@bwh.harvard.edu  
43

44 Word Count: 4400  
45  
46  
47  
48  
49  
50  
51  
52  
53  
54  
55  
56  
57  
58  
59  
60

## ABSTRACT

**Introduction:** The WHO Nutrition Target aims to reduce the global prevalence of low birth weight 30% by 2025. The Enhancing Nutrition and Antenatal Infection Treatment (ENAT) study will test the impact of packages of pregnancy interventions to enhance maternal nutrition and infection management on birth outcomes in rural Ethiopia.

**Methods and analysis:** ENAT is a pragmatic, open-label, 2x2 factorial, randomised clinical effectiveness study implemented in 12 rural health centers in Amhara, Ethiopia. Eligible pregnant women presenting at antenatal care (ANC) visits at <24 weeks gestation are enrolled (n=2400). ANC quality is strengthened across all centers. Health centers are randomised to receive an enhanced nutrition package (ENP) or standard nutrition care, and within each health center, individual women are randomised to receive an enhanced infection management package (EIMP) or standard infection care. At ENP centers, women receive a regular supply of adequately iodized salt and iron-folate (IFA), enhanced nutrition counseling, and those with mid-upper arm circumference <23 cm receive a micronutrient fortified balanced energy protein supplement (corn soya blend) until delivery. In standard nutrition centers, women receive routine counseling and IFA. EIMP women have additional screening/treatment for urinary and sexual/reproductive tract infections and intensive deworming. Non-EIMP women are managed syndromically per Ministry of Health Guidelines. Participants are followed until 1 month postpartum, and a subset until 6 months. The primary study outcomes are newborn weight and length measured at <72 hours of age. Secondary outcomes include preterm birth, low birthweight, and stillbirth rates; newborn head circumference; infant weight and length for age z-scores at birth; maternal anemia; and weight gain during pregnancy.

**Ethics and dissemination:** ENAT is approved by the Institutional Review Boards of Addis Continental Institute of Public Health (001-A1-2019) and Mass General Brigham (2018P002479). Results will be disseminated to local and international stakeholders.

**ISRCTN Registration:** 15116516

**Funding:** Bill & Melinda Gates Foundation

**Protocol:** Version 4.0 (August 2021)

## Article Summary

What is known about the subject:

- In low- and middle-income countries, maternal undernutrition is prevalent and a major risk factor for adverse birth outcomes, including spontaneous preterm birth, low birth weight and small for gestational age infants.
- Maternal infections in pregnancy are also common, yet under-recognized risk factors for preterm birth and poor fetal growth in low- and middle-income countries.
- Beyond their independent effects, maternal infections and nutritional status may have synergistic effects on fetal growth and gestational length.

What this study hopes to add:

- Increase the evidence-base on the role of antenatal infection management on maternal and birth outcomes in a low resource rural setting in Sub-Saharan Africa.
- Increase the evidence-base on the role of targeted, fortified balanced energy protein supplementation on maternal and birth outcomes in a low resource rural setting Sub-Saharan Africa.
- Evaluate the benefit of developing intervention packages with local stakeholders that are implemented within existing health systems
- ~~Increase the evidence-base on the role of antenatal infection management on maternal and birth outcomes in a low resource rural setting.~~
- ~~Increase the evidence-base on the role of targeted, fortified balanced energy protein supplementation on maternal and birth outcomes in a low resource rural setting.~~
- ~~Evaluate the benefit of developing intervention packages with local stakeholders that are implemented within existing health systems.~~

## INTRODUCTION

The World Health Organization (WHO) Third Global Nutrition Target aims to reduce the proportion of babies born low birthweight (LBW, <2500 grams) by 30% by the year 2025[1]. Approximately 20.5 million infants were born LBW in 2015, with 91% from low-middle income countries (LMIC) and 24% in Sub-Saharan Africa [2]. The main etiologies of low birthweight are preterm birth (<37 gestational weeks) and fetal growth restriction, commonly classified as small-for-gestational-age (SGA) at birth. Preterm and SGA infants carry increased risk of mortality, morbidity, childhood stunting, neurodevelopmental impairment, and adult chronic disease [3–7]. Prevention of preterm birth and SGA is a key public health strategy to improve child survival and health in LMICs.

In LMICs, maternal undernutrition is prevalent and a major risk factor for adverse birth outcomes, including spontaneous preterm birth, LBW and SGA [8,9]. Interventions to improve maternal nutritional status in pregnancy, including iron-folate [10], multiple-micronutrients [11], and balanced protein-energy (BEP) supplementation [12,13], have been individually tested and found to be effective in increasing mean birthweight. However, lower than expected benefit has been observed with the individual nutritional interventions [10,12–14]. Greater effect sizes are noted in undernourished women, and there is a need for additional studies with standardized supplementation criteria as well as the combination of BEP and micronutrient supplementation [12,13].

Maternal infections in pregnancy are also common, yet under-recognized risk factors for preterm birth and poor fetal growth in LMICs. Urinary tract infection or asymptomatic bacteriuria may affect 9-80% of pregnancies in sub-Saharan Africa [15] and are associated with a 2-fold elevated risk of preterm delivery [16]. Helminthic infections are prevalent and associated with systemic inflammation, LBW and preterm birth [17–19]. Genital tract infections may ascend the reproductive tract and lead to infection and inflammation in the amniotic fluid, predisposing to preterm birth [20]. In LMICs, screening and treatment of genitourinary tract infections during routine antenatal care (ANC) is infrequent due to lack of resources and capacity for laboratory testing. While epidemiologic data has consistently established associations between prenatal infections and adverse pregnancy outcomes, there is limited evidence on the effectiveness of prenatal interventions to screen and treat infections to prevent LBW in LMICs.



Beyond their independent effects, maternal infections and nutritional status may have synergistic effects on fetal growth and gestational length [21–25]. Figure 1 depicts several pathways linking maternal nutrition and infections in pregnancy. This framework provides the basis for the hypothesis that targeting both risk factors in pregnancy may lead to more substantial, and potentially synergistic, improvements in fetal growth and pregnancy length [26].

This manuscript details the study protocol for the Enhancing Nutrition and Antenatal Infection Treatment (ENAT) study in Amhara region, Ethiopia. In 2016, WHO released recommendations on an evidence-based, core package of ANC to optimize the pregnancy experience and outcomes [27], include guidelines on nutrition and infection management in pregnancy (Web Table 1). In Ethiopia, not all recommendations have been adopted or achieved high level of coverage or quality in ANC. The primary aim of the ENAT study is to determine the impact of WHO-recommended ANC interventions to optimize maternal nutrition and manage maternal pregnancy infections on infant birth size in Amhara, Ethiopia. We hypothesize that the nutrition and infection management packages will independently increase newborn birth weight and length, and that the combined effect of both packages will be greater than either alone.

## METHODS AND ANALYSIS

### Study Design

The ENAT study is a 2x2 factorial pragmatic, open-label, randomised clinical effectiveness study with cluster randomisation of the enhanced nutrition package (ENP) versus standard care (non-ENP), and individual level randomisation of an enhanced infection management package (EIMP) versus standard care (non-EIMP) (Figure 2).

### Study Setting

The ENAT study site was established in 2018 as a partnership with the Addis Continental Institute of Public Health (ACIPH), Amhara Regional Health Bureau, Amhara Public Health Institute and Brigham and Women's Hospital. The Amhara region has low-resourced health systems and poor health indicators. As per the 2016 Ethiopian Demographic Health Services (EDHS) data, Amhara had the country's highest rates of neonatal mortality (47 per 1000 live births) and LBW (22.2%), and high maternal mortality rate (412 per 100,000 live births) [28].



1  
2  
3 Rates of any prenatal care and institutional delivery and were 82.6% and 54.2%, respectively  
4 [29]. One in four women of reproductive age are underweight (body mass index < 18.5 kg/m<sup>2</sup>)  
5 [28] and geohelminth infections are prevalent, ranging from 21.1-43.5% [30,31].  
6  
7  
8

9  
10 The ENAT study is conducted in 12 rural health centers (each serving ~25,000 population) in  
11 West Gojjam (South and North Achefer districts [woredas]) and South Gondar (Dera and  
12 Libokemem districts) zones, Amhara (Figure 3, Site Map). The districts were chosen in  
13 collaboration with the Amhara Regional Health Bureau based on the high rates of  
14 undernutrition, risk of low birth weight, need for nutritional programs, and proximity to the  
15 regional laboratory. The study health centers were chosen based on accessibility, total ANC  
16 volume (minimum 250 women presenting to ANC/year), and infrastructure (functional  
17 laboratory).  
18  
19  
20  
21  
22  
23

#### 24 **Patient and public involvement**

25  
26 Prior to the study, formative work was conducted with a range of community members (mothers,  
27 families, community and religious leaders, health providers) [32]. This feedback directly  
28 informed the design of the study interventions, packages, and their implementation. Community  
29 sensitization was performed prior to initiating the study.  
30  
31  
32  
33

#### 34 **Study participants and recruitment**

35  
36 Pregnant women are recruited from ANC visits in designated ENAT study health centers. A  
37 study nurse explains study procedures and obtains written informed consent. For illiterate  
38 women, an impartial witness attests to consent and the woman provides a thumbprint.  
39  
40

41 To encourage early presentation at ANC clinics, community sensitization was conducted prior to  
42 study initiation. Study field data collectors and community cadres disseminated information  
43 about the ENAT study at monthly community-based pregnant women's conferences, and  
44 community and religious gatherings and encouraged presentation to the health centers if/as  
45 soon as pregnancy was suspected. Study enrollment began in August 2020 and will continue  
46 until the sample size has been met. As of September 1, 2021 ENAT has enrolled 2,148 women.  
47  
48  
49  
50

#### 51 *Inclusion criteria:*

- 52 • ≤24 weeks gestation based on a clinical algorithm (LMP and/or symphysis fundal height)  
53 who have a viable pregnancy  
54  
55

#### 56 *Exclusion criteria:*

57  
58  
59  
60

- Pregnant women presenting for first ANC >24 weeks
- Pregnant women who live >2 hours walking distance from ENAT health centers
- Pregnant women presenting at first ANC with fetus that is non-viable (without a heartbeat on enrollment ultrasound)

### ENAT Study Interventions

Health systems strengthening of ANC services was performed in ENAT health centers prior to the study to benefit all women receiving care in these facilities. Health systems strengthening was conducted in partnership with Amhara Regional Health Bureau and local partners including Jhpiego. Staff were trained in ANC standards, guidelines, and measurements (blood pressure, gestational age, birth weight [33]). Facilities were stocked with basic equipment, medications, and diagnostic testing. Laboratory capacity was augmented, and all health centers were equipped with ultrasound machines.

#### A. Enhanced Nutrition Package (ENP) (Table 1)

**Table 1: Enhanced Nutrition Package Components**

| ENP Content                        | Activity                                                                                                                                        | Frequency                                                                                                          |
|------------------------------------|-------------------------------------------------------------------------------------------------------------------------------------------------|--------------------------------------------------------------------------------------------------------------------|
| Nutritional education/counseling   | Counseling about healthy eating, adequate pregnancy weight gain, increasing protein and energy in diet, importance of Iron/folate, iodized salt | Every ANC visit (monthly, potentially less frequently pending COVID)                                               |
| Iron-Folic Acid                    | Strengthen counseling, supply and reinforcement of daily IFA (60 mg Fe/400 µg folic acid)                                                       | Provide 90-day supply per FMOH, adherence/counseling at every ANC visit                                            |
| Iodized salt                       | For all pregnant women, provide up to 1kg at enrollment and follow up visit for household use during pregnancy with counseling                  | Provided adequately iodized salt at enrollment, and monthly follow up visits; adherence/counseling every ANC visit |
| Balanced Energy Protein supplement | For pregnant women with MUAC <23 cm, local Corn Soya Blend 200 gm daily supplement (784 kcal/day, 28 g protein)                                 | Daily supplement, distributed at ANC visits (monthly, given COVID may provide longer term supply)                  |

##### A.1 Nutritional Education/Counseling on Adequate Pregnancy Nutrition and Weight Gain:

Routine ANC nutrition counseling includes increasing intake and dietary diversity, however, can vary depending on patient load. For ENP centers, supplementary, locally contextualized, counseling was developed based on our formative work [32], and is delivered by midwives. Content includes BMI-based recommended weight gain, dietary diversity, and educational messages developed to address local cultural beliefs related to dietary intake during pregnancy

1  
2  
3 as well as side effects of iron-folate. Nutrition education materials, including posters and videos,  
4 are shown in ENP health centers to promote women's behavior change and maximize their  
5 exposure to various but consistent nutrition messages.  
6  
7

8  
9  
10 *A.2 Iron Folic Acid (IFA)*: The Ethiopian FMOH recommends 60 mg iron plus 400 µg folic acid  
11 supplements, orally once daily in pregnancy. In August-Sept 2019, coverage of IFA was 46.3%  
12 in the ENAT health centers, and our formative work indicated that barriers included local beliefs  
13 about "big babies" and side effects such as constipation. In the ENP health centers, additional  
14 counseling is conducted, utilizing video/media to address common cultural beliefs and side  
15 effects, and women are reminded at each ANC visit about IFA consumption, management of  
16 side effects and provided refills per FMOH guidelines.  
17  
18  
19

20  
21  
22 *A.3 Provision of Adequately Iodized Household Salt*: In ENP centers, we provide a monthly  
23 household supply of high-quality adequately iodized salt at every ANC visit. The iodized salt  
24 (Waff Manufacturing, 30-40 ppm potassium iodate, 600 gm bottle) is packaged in airtight,  
25 resealable, polyethylene containers, to allow resealing after use and to reduce risk of  
26 evaporative losses at the household level. Quality control procedures are in place to ensure that  
27 iodization is in the proper range at production and maintained at distribution sites. Women are  
28 counselled that salt should be used to replace their household salt, on the approximate daily  
29 use (~10 gm (3 pinches)/day), the proper storage of salt (away from light, heat, humidity, re-  
30 capping container after use) and use of salt only after cooking/heating of food.  
31  
32  
33  
34  
35  
36  
37

38 *A.4 Fortified Balanced Energy Protein (BEP) Supplement for Malnourished Women (MUAC <23*  
39 *cm)*: In the ENP health centers, women who have MUAC <23 cm at enrollment, or at any follow  
40 up ANC visit, are provided with a monthly supply of locally produced micronutrient fortified corn  
41 soya flour blend (Super Cereal, Faffa Food Share Company, Addis Ababa, Ethiopia) at every  
42 ANC visit until delivery. The daily corn soya blend (CSB) supplement (200gm) is provided in  
43 addition to normal meals and contains 28 g of protein and 784 kcal (Web Table 2). This protein  
44 composition falls within recommendations that a BEP supplement provide ~50% of the  
45 additional protein requirement in the 3<sup>rd</sup> trimester (range of 28-36g for malnourished  
46 populations) [34]. Micronutrient composition of the provided BEP is also shown in Web Table 2.  
47 The fortified BEP supplement meets the IOM recommended levels in pregnancy [35] for  
48 Vitamins A, D, E, B<sub>2</sub>, B<sub>3</sub>, B<sub>6</sub>, B<sub>12</sub>, C, calcium and phosphorus (see Web Table 2). 35 sachets  
49 (200 gm each) are distributed to women at enrollment and at follow up monthly ANC visits to  
50  
51  
52  
53  
54  
55  
56  
57  
58  
59  
60

allow for additional doses in case she is delayed in returning for ANC and/or for potential family sharing practices.

## B. Enhanced Infection Management Package (EIMP) (Table 2)

Women randomised to the EIMP intervention, receive the following interventions at their first ANC visit >12 weeks.

**B.1 Urinary Tract Infection/Asymptomatic Bacteriuria:** A clean catch midstream urine specimen is collected using a vacutainer with boric acid preservative (Beckton Dickinson). Urine culture and antibiotic susceptibility testing are performed at Amhara Public Health Institute (APHI), the regional laboratory certified by the ENAO (Ethiopian National Accreditation Office) - ISO (International Organization for Standardization) 15189. Antibiotic susceptibility is determined including the Vitek method (bioMerieux, Marcy l'Etoile, France), or Kirby Bauer Disk Diffusion. Urinary tract infections (UTI) are classified in Web Table 3 and treated with an oral antibiotic based on antibiotic sensitivity patterns (Web Table 4). Antibiotics are provided to pregnant women at no cost and the first dose is directly observed. Women with severe illness or difficult to treat infections are referred to the obstetrics department at Feligot Hiwot hospital. Women provide a test of cure specimens at the following ANC visit.

**Table 2. ENAT EIMP Components**

| Infection                                          | ENAT Enhanced Infection Management Package (EIMP) Activity                                                                                                                                                                                                                                                                                                                                             |
|----------------------------------------------------|--------------------------------------------------------------------------------------------------------------------------------------------------------------------------------------------------------------------------------------------------------------------------------------------------------------------------------------------------------------------------------------------------------|
| Urinary Tract Infection/Asymptomatic Bacteriuria   | <p><i>Screen:</i> Urine culture and antibiotic sensitivity.</p> <p><i>Treat:</i> Initially per clinical protocol, with targeted antibiotic treatment based on antibiotic resistance patterns.</p>                                                                                                                                                                                                      |
| Sexually Transmitted/Reproductive Tract Infections | <p><i>Screen:</i></p> <ol style="list-style-type: none"> <li>1) <b>ALL pregnant women</b> for gonorrhoea, chlamydia using accurate rapid diagnostic testing for chlamydia and gonorrhoea</li> <li>2) Pregnant women <b>with symptoms</b> are screened for trichomonas and bacterial vaginosis</li> </ol> <p><i>Treat:</i> All positive cases and partners (for gonorrhoea, chlamydia, trichomonas)</p> |
| Geo-helminths                                      | Presumptive deworming with mebendazole 500 mg or albendazole 400 mg as per FMOH guideline; Stool screen and treatment for parasitic infections at least 4 weeks after deworming. If positive, treatment for intestinal parasites per FMOH guidelines.                                                                                                                                                  |

1  
2  
3 *B.2 Sexually Transmitted/Reproductive Tract Infections:* Women self-collect vaginal  
4 specimens that are tested for gonorrhea and chlamydia using the *Xpert® CT/NG assay*  
5 (*Cepheid, Sunnyvale, CA*), a modular cartridge-based platform for testing each specimen by  
6 nucleic acid amplification at APHI. Chlamydia is treated with Azithromycin 1 gram orally  
7 once and gonorrhea is treated with Ceftriaxone 250 mg IM once + Azithromycin 1gram  
8 orally once. Partner treatment is on a voluntary basis with a regimen as recommended by  
9 the Ethiopian STI management guidelines [36]. A test of cure is obtained at the next ANC  
10 visit.  
11  
12  
13  
14  
15  
16

17 For women who report symptoms of abnormal vaginal discharge, vulvar symptoms, or lower  
18 abdominal tenderness, additional vaginal swabs are collected for trichomonas and bacterial  
19 vaginosis by point of care diagnostics. Trichomonas is tested using the OSOM® trichomonas  
20 rapid test (Sekisui Diagnostics, Lexington, MA). Bacterial vaginosis is tested using  
21 Diagnosit® BVBLUE® test (Gryphus Diagnostics, Knoxville, TN)). Trichomonas is treated with  
22 Metronidazole 2 grams orally once, and partners are treated. Bacterial vaginosis is treated with  
23 metronidazole 500 mg twice daily for 7 days.  
24  
25  
26  
27  
28  
29

30 *B.3. Parasitic Intestinal Infections:* In settings of high geo-helminth burden, WHO  
31 recommends prophylactic deworming in 2nd and 3rd trimester of pregnancy [37]. At study  
32 initiation, mebendazole (500 mg) was provided twice in pregnancy consistent with WHO  
33 guidelines. Due to health provider concerns regarding medication package insert  
34 information contraindicating use in early pregnancy, in September 2020, the protocol was  
35 modified to a single presumptive deworming in the 3rd trimester. With the adoption of new  
36 Ethiopian FMOH ANC guidelines allowing earlier provision of anti-helminthics in pregnancy,  
37 in May 2021, the ENAT protocol was modified to provide presumptive deworming in the 2nd  
38 trimester followed by a stool screening and treatment at least 4 weeks later. In the first post-  
39 deworming visit, stool is screened for intestinal parasites in the health center lab using wet  
40 mount microscopy available at the health center. Women identified with parasitic infections  
41 are treated as per FMOH recommendations (Web Table 4).  
42  
43  
44  
45  
46  
47  
48  
49  
50

### 51 **Randomisation/Allocation**

52 At the first level of randomisation, clusters (i.e., health centers) are randomised into one of  
53 two nutrition interventions: a) ENP or b) standard nutrition care. We performed a  
54 constrained randomisation to ensure balance across the two arms of the study for key  
55  
56  
57  
58  
59  
60

1  
2  
3 indicators including: population size, pre-study ANC coverage rates, number of births, and  
4 travel time to the regional center of Bahir Dar. We: 1) set reasonable tolerance levels for the  
5 restriction variables, 2) created all possible random sequences, where each sequence  
6 allocated 6 health centers to the ENAT Nutrition Package and 6 health centers to routine  
7 care, 3) assessed each sequence as to whether or not it met these restriction criteria, and  
8 4) choose randomly from the subset of all such allocation sequences that met the criteria. At  
9 the second level of randomisation, we randomised individual pregnant women presenting  
10 for ANC at each health center to receive a) *ENAT Enhanced Infection Management*  
11 *Package (EIMP)*, or b) standard infection care (Figure 2). Each health center received a  
12 pre-generated randomisation list of sequential individual assignments to EIMP or standard  
13 care, where assignments were equally allocated to each arm within randomly permuted  
14 blocks of size 4, 8, or 12. The randomisation lists were generated separately, by health  
15 center, using a script written by one of the authors (LCM) in R [38].  
16  
17  
18  
19  
20  
21  
22  
23  
24

### Outcome Measures

The **primary outcomes** are

- P1. Newborn weight measured within 72 hours of birth
- P2. Newborn length measured within 72 hours of birth

The **secondary outcomes** include:

- S1. Length of gestation, with gestational age determined by <24-week pregnancy ultrasonography
- S2. Proportion of pregnancies resulting in spontaneous preterm delivery
- S3. Proportion of newborns born of low birthweight (<2500 grams), as measured within 72 hours of life
- S4. Proportion of newborns born small-for-gestational age, as defined by the INTERGROWTH 21st neonatal birth weight standard.
- S5. Stillbirth rate
- S6. Newborn head circumference within 72 hours of birth
- S7. Infant Z-scores for weight-for-age, length-for-age, head circumference-for-age within 72 hours of birth
- S8. Maternal gestational weight gain
- S9. Maternal anemia (3rd trimester)

The definitions used for each outcome measure is shown in Table 3.



Table 3: ENAT Study Outcomes

| Primary outcomes                                                           |                                                                                                                                                                                                                                                                                                                                                                                                               |
|----------------------------------------------------------------------------|---------------------------------------------------------------------------------------------------------------------------------------------------------------------------------------------------------------------------------------------------------------------------------------------------------------------------------------------------------------------------------------------------------------|
| <b>P1. Newborn weight &lt;72 hours of birth</b>                            | Weight of the unclothed infant measured at <72 hours of life                                                                                                                                                                                                                                                                                                                                                  |
| <b>P2. Newborn length measured at birth</b>                                | Infant Length measured at <72 hours of life                                                                                                                                                                                                                                                                                                                                                                   |
| Secondary outcomes                                                         |                                                                                                                                                                                                                                                                                                                                                                                                               |
| <b>S1. Gestational age</b>                                                 | Gestational age determined by enrollment ultrasound, CRL used if <95 mm (Intergrowth 21st), then BPD/FL (WHO Kiserud) used if CRL>95 mm or missing                                                                                                                                                                                                                                                            |
| <b>S2a. Proportion of pregnancies resulting in preterm delivery</b>        | <u>Numerator: number of pregnancies resulting in spontaneous termination of pregnancy from 24 to &lt;37 weeks (including preterm live birth or fetal loss (spontaneous pregnancy loss 24 to &lt;37 weeks, not due to induced abortion)).</u><br><u>Denominator: All pregnancy outcomes &gt;24 weeks</u>                                                                                                       |
| <b>S2b. Preterm birth</b>                                                  | Numerator: Live births <37 weeks of gestation<br>Denominator: Livebirths                                                                                                                                                                                                                                                                                                                                      |
| <b>S3. Small for Gestational Age<sup>a</sup> (Intergrowth)</b>             | <10% birthweight for GA by sex compared to Intergrowth reference <sup>2</sup>                                                                                                                                                                                                                                                                                                                                 |
| <b>S4. Low birthweight rate</b>                                            | Low birthweight is defined as birthweight (measured within the first 72 h of life) of <2500 g. We will also assess the outcome of birthweight <2000 g.                                                                                                                                                                                                                                                        |
| <b>S5. Stillbirth rate</b>                                                 | Numerator: Stillbirth (≥28 weeks gestation)- fetal death with no signs of life<br><i>A preterm stillbirth is defined as an infant born without signs of life (no spontaneous crying, breathing, and/or movement) at 28 to &lt;37 weeks gestation.</i><br><i>A term stillbirth is defined as an infant born without signs of life at ≥37 wks</i><br><br>Denominator: All live births and stillbirths ≥28 weeks |
| <b>S6. Newborn head circumference</b>                                      | Head circumference of the infant measured at <72 hours of age                                                                                                                                                                                                                                                                                                                                                 |
| <b>S7. Newborn weight, length, and head circumference for age Z-scores</b> | Infant weight, length, and head circumference for age z-scores measured at <72 hours of life, calculated using the Intergrowth reference for size at birth.                                                                                                                                                                                                                                                   |
| <b>S8. Rate of weight gain in pregnancy</b>                                | Maternal weight gain (kg) per week gestation in the 2nd and 3rd trimester                                                                                                                                                                                                                                                                                                                                     |
| <b>S9. Maternal anemia</b>                                                 | Mean hemoglobin concentration in 3 <sup>rd</sup> trimester (Mission hemoglobinometer)                                                                                                                                                                                                                                                                                                                         |

<sup>a</sup>Abbreviations: WHO, World Health Organization; UTI, urinary tract infection; ANC, antenatal care; SGA, small-for-gestational-age; GA, gestational age

## Data Collection



1  
2  
3 The timeline of individual participant study visits, measurements and data collection are shown  
4 in Table 4. All study visits are conducted at the health center, with the exception of the birth visit  
5 that may be conducted at home within 72 hours of delivery, for births occurring at home or  
6 outside of the study area. Adherence monitoring visits also occur at the home for those  
7 participants who do not return to the health center for follow up.  
8  
9

10  
11  
12 The core of the data collection system is the Survey Solutions platform (World Bank, v20.08,  
13 2021). Study nurses enter data directly into electronic tablets with programmed validity checks  
14 during study visits. Paper forms are used if tablets are temporarily unavailable. The tablets are  
15 regularly synchronized to the server on the ACIPH campus. A web-based dashboard supports  
16 data collectors, supervisors, and investigators in real time management and monitoring of study  
17 activities.  
18  
19  
20  
21  
22  
23  
24  
25  
26  
27  
28  
29  
30  
31  
32  
33  
34  
35  
36  
37  
38  
39  
40  
41  
42  
43  
44  
45  
46  
47  
48  
49  
50  
51  
52  
53  
54  
55  
56  
57  
58  
59  
60

Table 4. Participant timeline schedule of enrolment, interventions, assessment, and visits

|                                      |                        | STUDY PERIOD    |          |      |      |           |         |
|--------------------------------------|------------------------|-----------------|----------|------|------|-----------|---------|
|                                      |                        | Post-allocation |          |      |      |           |         |
|                                      |                        | Allocation      | Prenatal |      |      | Postnatal |         |
| TIMEPOINT                            | Enrolment<br><24 weeks | ANC1            | ANC2     | ANC3 | etc. | Birth     | 1 month |
| <b>ENROLMENT:</b>                    |                        |                 |          |      |      |           |         |
| Eligibility screen                   | X                      |                 |          |      |      |           |         |
| Informed consent                     | X                      |                 |          |      |      |           |         |
| Allocation                           | X                      |                 |          |      |      |           |         |
| <b>INTERVENTIONS:</b>                |                        |                 |          |      |      |           |         |
| ENP                                  | X                      | X               | X        | X    | X    |           |         |
| EIMP                                 | X                      | X               | X        | X    | X    |           |         |
| ENP + EIMP                           | X                      | X               | X        | X    | X    |           |         |
| <b>ASSESSMENTS:</b>                  |                        |                 |          |      |      |           |         |
| <b>MOTHERS</b>                       |                        |                 |          |      |      |           |         |
| US (fetal growth & GA determination) | X                      |                 |          | X    |      |           |         |
| Basic medical & obstetric history    | X                      |                 |          |      |      |           |         |
| Socioeconomic status                 | X                      |                 |          |      |      |           |         |
| Health care costs                    | X                      |                 | X        |      |      |           |         |
| Food insecurity and Dietary Intake   | X                      | X               |          | X    |      |           |         |
| Maternal stress and depression       |                        | X               |          | X    |      |           | X       |
| Maternal anthropometrics             | X                      | X               | X        | X    | etc. | X         | X       |
| Maternal morbidity                   | X                      | X               | X        | X    | etc. | X         | X       |
| Labor and Delivery characteristics   |                        |                 |          |      |      | X         |         |
| Assessment of home environment       |                        |                 |          |      |      | X         |         |
| <b>INFANTS</b>                       |                        |                 |          |      |      |           |         |
| Anthropometrics                      |                        |                 |          |      |      | X         | X       |
| Breast feeding practices             |                        |                 |          |      |      | X         | X       |
| Morbidity and mortality              |                        |                 |          |      |      | X         | X       |

### *Enrollment Visit*

At the enrollment visit at the health center, data is collected on the participant's socio-economic status, basic medical and obstetric history, pregnancy history, maternal morbidity including COVID-19, food security, and dietary intake. A dietary quality questionnaire is administered, which has been used in the Ethiopian context [39].

A basic abdominal obstetric ultrasound is performed by a trained research nurse at the enrollment visit for pregnancy dating. An intensive ultrasonography training and standardization was performed by General Electric, Ethiopian Radiography Association and sonographers from Beth Israel Deaconess Hospital (Boston, MA). Sonographers measure crown-rump length, bi-parietal diameter (outer to inner), head circumference, femoral length, abdominal circumference in duplicate. Approximately 10% of images are externally reviewed (MS, BJW) for quality control.

Maternal and infant anthropometrics are measured by research staff (nurses, data collectors) at baseline and follow up visits (Table 3). Maternal weight is measured with a digital scale (ADE M317600, Germany; precision 100 gm) and height is measured using an adult stadiometer (Shorr Productions HeightLite). All measurements are performed twice, with a third measurement done if the difference is greater than the minimal acceptable difference defined by Intergrowth 21 [40]. Nurses and data collectors are trained and standardized in anthropometric measurements at the start of the study and every 6 months.

### *Follow up ANC Visits*

During the follow up ANC visits at the health center, research staff interview women about their health status, morbidity, pregnancy history/complications, counselling/services received, maternal mental health screen, and dietary intake. Data is abstracted from routine ANC records, including blood pressure, lab testing results, and management. Maternal weight and mid-upper arm circumference are measured. In a subset of women, a semi-quantitative food frequency questionnaire for ~70 food items is administered at ANC visits. Hemoglobin is measured during enrollment in the 1st or 2<sup>nd</sup> and 3<sup>rd</sup> trimester ANC visits (Hemocue 301c). Venous hemoglobin is measured if blood is already being drawn for other purposes, and otherwise capillary hemoglobin is measured.

1  
2  
3 Adherence to each nutritional supplement is assessed at every ANC visit. The participant is  
4 asked to bring the used IFA bottle, salt container, and BEP sachets back to the health  
5 center at each ANC visit. Pill or empty sachet count is done, and the salt container weighed.  
6 The participant is also asked to recall the number of sachets and/or pills that were taken in  
7 the last 7 days, and since the last visit. For mothers who do not attend scheduled ANC  
8 visits, a home visit is made by a data collector to assess adherence and conduct pill/sachet  
9 counts and remind the mother to return for ANC and study visits.  
10  
11  
12  
13  
14  
15

16 A repeat ultrasound is performed in the 3<sup>rd</sup> trimester to monitor fetal growth and assess the  
17 position of the baby. If the fetus is determined to be in non-vertex positioning at the 3<sup>rd</sup>  
18 trimester scan, the nurse recommends that the women deliver in the nearest hospital with  
19 Cesarean section capacity.  
20  
21  
22

### 23 *Birth Visit*

24 Participants who deliver in health facilities are assessed by research staff based in health  
25 centers or hospitals as soon as possible after birth, but within 72 hours of life. Data is gathered  
26 from women and from chart review about the delivery and immediate postpartum period.  
27 Medical records are reviewed for intrapartum course (e.g., vital signs, duration of labor), delivery  
28 complications, and maternal/neonatal morbidity. For deliveries that occur at home, a home visit  
29 is made by research staff as soon as possible upon birth notification (within 72 hours). Maternal  
30 history is obtained per self-report regarding delivery history/complications, and postpartum  
31 maternal/neonatal morbidity.  
32  
33  
34  
35  
36  
37  
38

39 Infant weight is measured using a high quality, precise digital infant scale (ADE M112600,  
40 Germany; precision 5 gm). Infant length is measured using a portable infantometer  
41 (Perspective Enterprises PE-RILB-LTWT, Michigan USA, precision 1 mm). Recumbent  
42 length is recorded to the last completed (not the nearest) mm. Head, chest, and mid upper  
43 arm circumferences (MUAC) is measured to the nearest millimeter (mm) using insertion  
44 tapes (Shorr productions, Maryland USA). Daily calibration checks are made before each  
45 use of infant weighing scales, and length boards to ensure accuracy of measurement  
46 [41,42].  
47  
48  
49  
50  
51  
52

### 53 *Postnatal Visit*

1  
2  
3 Postnatal visits are made at 4-6 weeks for all participants to collect data on maternal and  
4 infant vital status, health, morbidity and anthropometrics. Visits are conducted primarily at  
5 the health center, and home visits are made for those who do not return for follow up. For  
6 infants who follow up at the health center for routine postnatal care or immunizations, study  
7 visits are additionally conducted at 3 and 6 months.  
8  
9  
10

### 11 *Cost Data*

12 Data regarding the costs of delivery of the ENAT study interventions is collected in all study  
13 arms. Costs of interventions include three components: system-level costs, costs incurred by  
14 health workers for participating in the interventions, and costs incurred by individual patients and  
15 families. At the system level, costs are captured using the World Health Organization (WHO)  
16 framework [43] using modified survey tools based on our published survey instruments, cost  
17 estimation protocols, and procedures that have been validated and used in other LMICs (e.g.,  
18 Rwanda, India) [44–46]; Costs incurred by health workers for receiving training include time or  
19 money spent for participating in training sessions. For all time spent, monetary value is assigned  
20 based on their average hourly wage. Costs incurred by patients include costs or time spent for  
21 received care or home visits. For visits in health facilities, we collect self-reported cost data from  
22 patients.  
23  
24  
25  
26  
27  
28  
29  
30  
31  
32

33 *Biospecimens:* In a subset of consenting women, additional biospecimens will be collected for  
34 future analysis. These specimens are shown in Web Table 5.  
35  
36  
37

### 38 **Statistical Analysis**

39 Data collected in this study will enable us to conduct a comprehensive analysis of the impact of  
40 interventions randomized at the health center and individual level. The Detailed Statistical  
41 Analysis Plan (SAP) of the ENAT study is published separately at:  
42 <https://addiscontinental.edu.et/>. In brief, our statistical approach will have multiple steps. We  
43 will describe the health centers and pregnant women enrolled in the study and conduct a  
44 descriptive quantitative analysis of variables at multiple levels to assess the degree to which our  
45 randomization scheme resulted in similar sub-populations of pregnant women. We will assess  
46 the receipt of and adherence to interventions offered, conduct descriptive analyses of the  
47 primary and secondary outcomes, compare the outcomes between intervention groups, assess  
48 potential effect modifiers, and conduct pre-specified sub-group analysis.  
49  
50  
51  
52  
53  
54  
55  
56  
57  
58  
59  
60

## Sample Size

We have estimated the effect size detectable with 80% power under a cluster-randomised design, with 6 health centers per study arm. Fixing recruitment of pregnant women to 18 months, we estimated that within this time period the average health center in the proposed study site would enroll around 200 women into ANC at  $\leq 24$  weeks gestation, and would yield 112 live born infants weighed within 72 hours of life (assuming ~70% of enrolled pregnancies result in a live birth, and ~80% are followed up and weighed within 72 hours). Beyond the above determination of average cluster size, we have additionally made the following assumptions in order to estimate effect sizes detectable with 80% power: 1) mean birthweight and standard deviation as per prior studies in Gondor (mean birth weight of 2900 gm, SD 450gm) and 2) variation in distribution of weight between clusters as reflected through an coefficient of variation ( $k=0.01$ ) [47]. In total this includes 2,400 pregnant mothers enrolled in 12 health centers, resulting in 1,440 live births with a birthweight within 72 hours. This sample size provides 80% power to detect a 66 gram difference in birthweight between the ENAT EIMP or routine care group in a marginal analysis (i.e. irrespective of whether mothers did or did not receive the ENP), and a 90 gm difference between ENP vs routine care (marginal analysis).

*Length.* With the assumptions of clusters and enrollment above, we assumed mean infant length of 49.5 cm (SD 2.4) (based on the Malawi LAIS study [48,49] and coefficient of variation  $k=0.008$  (sector level variation in JiVitA study) [47]. For the EIMP vs. routine care comparison, we would have 80% power to detect a 3.0 mm difference in mean infant length. For the ENP vs. non-ENP comparison (marginal analysis) we would have 80% power to detect a 7.8 mm difference in infant length between the women receiving the package of enhanced nutrition-infection compared to standard nutrition care.

## Study Monitoring

An external Study Monitoring Committee (SMC) is established to monitor the progress of the study, including enrollment, progress indicators and adverse events. The SMC includes an independent Ethiopian obstetrician (Dr. Delayehu Bekele) and an epidemiologist (Professor Simon Cousens). The committee met before study initiation, at mid-enrollment, and every 6 months to review study progress. Interim analysis will not be performed.

## ETHICS AND DISSEMINATION

**Research Ethics approval:** The ENAT protocol was approved at Addis Continental Institute of Public Health (001-A1-2019) and Mass General Brigham Institutional Review Board (2018P002479). The APHI granted local permission to conduct the study.

The study is registered at ISRCTN (ISRCTN15116516). Protocol modifications will be communicated to respective IRBs and ISRCTN.

### Confidentiality

All the data collected for this study is kept strictly confidential at Addis Continental Institute of Public Health on a local encrypted server. Personal identifiers are not used in study-specific forms, aside from the identifier module. Paper copies of data forms for data entry and analysis are stored in a locked file when not in use. Access to data files containing personal identifying information is limited to the principal investigators and key staff.

### Ancillary care

ENAT project helps cover ancillary care related to study participation that is not covered by the health system.

### Dissemination plan

ENAT study findings will be disseminated to FMOH, APHI, ARHB, Zonal health departments, woreda health offices, community representatives, and to other relevant stakeholders. Involving relevant stakeholders in the dissemination process will help to enhance ownership of the research output and the ultimate integration of findings into programs. The dissemination will be in the form of presentations in workshops, conferences, and symposiums at local, regional, national, and international levels as appropriate. In addition, reports and peer-review journal publications will be produced.

## DISCUSSION

Despite the high global burden of low birthweight, preterm birth and fetal growth restriction, few interventions have demonstrated efficacy or effectiveness in the prevention of these adverse birth outcomes. Novel, integrated approaches are needed to make more substantial, scalable and sustainable impacts in order to meet the WHO's Nutrition targets. A critical feature of the ENAT study is its health systems approach and involvement of key local stakeholders in the design of intervention packages and implementation. The packaging/bundling of interventions



1  
2  
3 aims to maximize their potential impact, cost-effectiveness, learning, and future scalability. This  
4 study will provide important evidence on the role of strengthening ANC programs to improve  
5 maternal health and birth outcomes, and will help inform future ANC policies in Ethiopia. ENAT  
6 will contribute to the growing body of knowledge regarding the effectiveness of BEP  
7 supplementation during pregnancy. Secondly, despite the high burden of antenatal infections,  
8 there is limited high-quality evidence that interventions to treat prenatal infections improves birth  
9 outcomes. To our knowledge, there is even more limited data on the interactions of nutrition  
10 and infections in pregnancy and this study will provide novel new insight on the potential for  
11 synergistic benefits of an integrated approach. Finally, the study will generate implementation  
12 learning on how to optimize delivery of WHO guidelines in resource limited health systems.  
13  
14  
15  
16  
17  
18  
19  
20

### 21 **Access to data**

22 The final dataset will be available to the ENAT investigative team and collaborators.  
23 Anonymized study data may be made available upon request to the study PIs in accordance  
24 with Ethiopian and US regulatory guidelines.  
25  
26

### 27 **Declaration of interests**

#### 28 *Financial and competing interests of the PIs*

29 ACL reports funding from the Bill & Melinda Gates Foundation, Eunice Kennedy Shriver  
30 National Institute of Child Health and Human Development and the World Health Organization.  
31 YB reports funding from FORMAS, USAID, National Institute of Environmental Health Sciences  
32 and from the Bill & Melinda Gates Foundation. BJW reports funding from National Institute of  
33 Environmental Health Sciences and from the Bill & Melinda Gates Foundation.  
34  
35  
36

37 **Funding Statement:** This work was supported by the Bill & Melinda Gates Foundation grant  
38 number OPP1184363. The funder provided input on the study design, but played no role in the data  
39 collection, data analysis, interpretation of data, writing of the report or decision to submit the report for  
40 publication.  
41  
42

### 43 **Acknowledgements**

44 We would like to thank the ENAT partners for their support and contributions to the study,  
45 including the Amhara Regional Health Bureau, Amhara Public Health Institute, Ethiopian  
46 Federal Ministry of Health, Ethiopian Society of Obstetrics and Gynecology, General Electric,  
47 Ethiopian Society of Radiology, and Jhpiego. We acknowledge the Child Investment Fund who  
48 supported Jhpiego health systems strengthening efforts in study areas. We would also like to  
49 thank our Study Monitoring Committee, Dr. Delayehu Bekele and Professor Simon Cousens.  
50  
51

### 52 **Author Contributions**

53 Wrote manuscript: ACL, LCM, FW, ME, YB

54 Designed study/protocol: ACL, FW, LCM, EB, ME, GC, PC, SI, CL, RM, AWT, BJW, AQ, YB  
55  
56  
57  
58  
59  
60

1  
2  
3 Designed study materials/study tools: ACL, FW, EB, YB, MD, ME, NF, IO, WK, TS, FS, FT, ST,  
4 KY, SI, YK, CL, RM, MS, FV, AWT, YB  
5 Trained field data collectors: FW, EB, YB, MD, ME, WK, TS, FS, FT, ST, KY, AWT, ACL, YB  
6 Designed Data management system: NF, FS, FT, FV, AW  
7 Trained ultrasonography: MS, BW, KY, ST  
8 Critically reviewed/revised manuscript: all authors  
9 All authors have met ICJME criteria.  
10  
11  
12  
13  
14  
15  
16  
17  
18  
19

## 20 **FIGURE CAPTIONS**

21  
22  
23 **Figure 1. Conceptual diagram showing the pathways that link maternal undernutrition,**  
24 **maternal infection, and infant outcomes** (A, B, and C represent mechanisms, which are  
25 described in detail in the associated sections above)  
26

27 **Figure 2. ENAT Study Consort Diagram**

28  
29 **Figure 3. ENAT Study Site Map, Amhara Region, Ethiopia**  
30  
31  
32  
33  
34  
35  
36  
37  
38  
39  
40  
41  
42  
43  
44  
45  
46  
47  
48  
49  
50  
51  
52  
53  
54  
55  
56  
57  
58  
59  
60

## REFERENCES

- 1 World Health Organization. Global nutrition targets 2025: low birth weight policy brief. Geneva, Switzerland: 2014.
- 2 Blencowe H, Krusevec J, de Onis M, *et al*. National, regional, and worldwide estimates of low birthweight in 2015, with trends from 2000: a systematic analysis. *Lancet Glob Health* 2019;**7**:e849–60. doi:10.1016/S2214-109X(18)30565-5
- 3 Katz J, Lee AC, Kozuki N, *et al*. Mortality risk in preterm and small-for-gestational-age infants in low-income and middle-income countries: a pooled country analysis. *Lancet* 2013;**382**:417–25. doi:10.1016/S0140-6736(13)60993-9
- 4 Christian P, Lee SE, Donahue Angel M, *et al*. Risk of childhood undernutrition related to small-for-gestational age and preterm birth in low- and middle-income countries. *Int J Epidemiol* 2013;**42**:1340–55. doi:10.1093/ije/dyt109
- 5 Blencowe H, Lee ACC, Cousens S, *et al*. Preterm birth-associated neurodevelopmental impairment estimates at regional and global levels for 2010. *Pediatr Res* 2013;**74 Suppl 1**:17–34. doi:10.1038/pr.2013.204
- 6 Murray E, Fernandes M, Fazel M, *et al*. Differential effect of intrauterine growth restriction on childhood neurodevelopment: a systematic review. *BJOG* 2015;**122**:1062–72. doi:10.1111/1471-0528.13435
- 7 Danaei G, Andrews KG, Sudfeld CR, *et al*. Risk factors for childhood stunting in 137 developing countries: A comparative risk assessment analysis at global, regional, and country levels. *PLoS Med* 2016;**13**:e1002164. doi:10.1371/journal.pmed.1002164
- 8 Han Z, Mulla S, Beyene J, *et al*. Maternal underweight and the risk of preterm birth and low birth weight: a systematic review and meta-analyses. *Int J Epidemiol* 2011;**40**:65–101. doi:10.1093/ije/dyq195
- 9 Kozuki N, Katz J, Lee ACC, *et al*. Short Maternal Stature Increases Risk of Small-for-Gestational-Age and Preterm Births in Low- and Middle-Income Countries: Individual Participant Data Meta-Analysis and Population Attributable Fraction. *J Nutr* 2015;**145**:2542–50. doi:10.3945/jn.115.216374
- 10 Peña-Rosas JP, De-Regil LM, Garcia-Casal MN, *et al*. Daily oral iron supplementation during pregnancy. *Cochrane Database Syst Rev* 2015;:CD004736. doi:10.1002/14651858.CD004736.pub5

- 1  
2  
3 11 Keats EC, Neufeld LM, Garrett GS, *et al.* Improved micronutrient status and  
4 health outcomes in low- and middle-income countries following large-scale  
5 fortification: evidence from a systematic review and meta-analysis. *Am J Clin Nutr*  
6 2019;**109**:1696–708. doi:10.1093/ajcn/nqz023  
7  
8  
9 12 Imdad A, Bhutta ZA. Maternal nutrition and birth outcomes: effect of balanced  
10 protein-energy supplementation. *Paediatr Perinat Epidemiol* 2012;**26 Suppl**  
11 **1**:178–90. doi:10.1111/j.1365-3016.2012.01308.x  
12  
13 13 Ota E, Hori H, Mori R, *et al.* Antenatal dietary education and supplementation to  
14 increase energy and protein intake. *Cochrane Database Syst Rev*  
15 2015;:CD000032. doi:10.1002/14651858.CD000032.pub3  
16  
17  
18 14 Buppasiri P, Lumbiganon P, Thinkhamrop J, *et al.* Calcium supplementation  
19 (other than for preventing or treating hypertension) for improving pregnancy and  
20 infant outcomes. *Cochrane Database Syst Rev* 2011;:CD007079.  
21 doi:10.1002/14651858.CD007079.pub2  
22  
23  
24 15 Gilbert NM, O'Brien VP, Hultgren S, *et al.* Urinary tract infection as a preventable  
25 cause of pregnancy complications: opportunities, challenges, and a global call to  
26 action. *Glob Adv Health Med* 2013;**2**:59–69. doi:10.7453/gahmj.2013.061  
27  
28  
29 16 Romero R, Oyarzun E, Mazor M, *et al.* Meta-analysis of the relationship between  
30 asymptomatic bacteriuria and preterm delivery/low birth weight. *Obstet Gynecol*  
31 1989;**73**:576–82.  
32  
33  
34 17 Honkpéhèdji YJ, Adegbite BR, Zinsou JF, *et al.* Association of low birth weight  
35 and polyparasitic infection during pregnancy in Lambaréné, Gabon. *Trop Med Int*  
36 *Health* 2021;**26**:973–81. doi:10.1111/tmi.13591  
37  
38  
39 18 Aderoba AK, Iribhogbe OI, Olagbuji BN, *et al.* Prevalence of helminth infestation  
40 during pregnancy and its association with maternal anemia and low birth weight.  
41 *Int J Gynaecol Obstet* 2015;**129**:199–202. doi:10.1016/j.ijgo.2014.12.002  
42  
43  
44 19 Abioye AI, McDonald EA, Park S, *et al.* Maternal, placental and cord blood  
45 cytokines and the risk of adverse birth outcomes among pregnant women  
46 infected with *Schistosoma japonicum* in the Philippines. *PLoS Negl Trop Dis*  
47 2019;**13**:e0007371. doi:10.1371/journal.pntd.0007371  
48  
49  
50 20 Goldenberg RL, Hauth JC, Andrews WW. Intrauterine infection and preterm  
51 delivery. *N Engl J Med* 2000;**342**:1500–7. doi:10.1056/NEJM200005183422007  
52  
53  
54 21 Christensen DL, Kapur A, Bygbjerg IC. Physiological adaption to maternal  
55 malaria and other adverse exposure: low birth weight, functional capacity, and  
56 possible metabolic disease in adult life. *Int J Gynaecol Obstet* 2011;**115 Suppl**  
57 **1**:S16-9. doi:10.1016/S0020-7292(11)60006-4  
58  
59

- 1  
2  
3 22 Krawinkel MB. Interaction of nutrition and infections globally: an overview. *Ann*  
4 *Nutr Metab* 2012;**61 Suppl 1**:39–45. doi:10.1159/000345162  
5  
6  
7 23 Vohr BR, Poggi Davis E, Wanke CA, *et al.* Neurodevelopment: The Impact of  
8 Nutrition and Inflammation During Preconception and Pregnancy in Low-  
9 Resource Settings. *Pediatrics* 2017;**139**:S38–49. doi:10.1542/peds.2016-2828F  
10  
11 24 Kim H, Hwang JY, Ha EH, *et al.* Association of maternal folate nutrition and  
12 serum C-reactive protein concentrations with gestational age at delivery. *Eur J*  
13 *Clin Nutr* 2011;**65**:350–6. doi:10.1038/ejcn.2010.267  
14  
15  
16 25 Kutlesic V, Brewinski Isaacs M, Freund LS, *et al.* Executive Summary: Research  
17 Gaps at the Intersection of Pediatric Neurodevelopment, Nutrition, and  
18 Inflammation in Low-Resource Settings. *Pediatrics* 2017;**139**:S1–11.  
19 doi:10.1542/peds.2016-2828C  
20  
21  
22 26 Collin SM, Baggaley RF, Pittrof R, *et al.* Could a simple antenatal package  
23 combining micronutritional supplementation with presumptive treatment of  
24 infection prevent maternal deaths in sub-Saharan Africa? *BMC Pregnancy*  
25 *Childbirth* 2007;**7**:6. doi:10.1186/1471-2393-7-6  
26  
27 27 World Health Organization (WHO). WHO recommendations on antenatal care for  
28 a positive pregnancy experience. 2016.  
29  
30  
31 28 Central Statistical Agency CSAE, Icf. Ethiopia Demographic and Health Survey  
32 2016. Addis Ababa, Ethiopia: : CSA and ICF 2017.  
33  
34 29 Ethiopia Mini Demographic and Health Survey 2019: Key indicators. Rockville,  
35 Maryland, USA: EPHI and ICF: : Ethiopian Public Health Institute (EPHI)  
36 [Ethiopia] and ICF 2019.  
37  
38  
39 30 Shiferaw MB, Zegeye AM, Mengistu AD. Helminth infections and practice of  
40 prevention and control measures among pregnant women attending antenatal  
41 care at Anbesame health center, Northwest Ethiopia. *BMC Res Notes*  
42 2017;**10**:274. doi:10.1186/s13104-017-2609-6  
43  
44  
45 31 Belyhun Y, Medhin G, Amberbir A, *et al.* Prevalence and risk factors for soil-  
46 transmitted helminth infection in mothers and their infants in Butajira, Ethiopia: a  
47 population based study. *BMC Public Health* 2010;**10**:21. doi:10.1186/1471-2458-  
48 10-21  
49  
50  
51 32 Workneh F, Eglovitch M, Shiferaw T, *et al.* Dietary practices among pregnant  
52 women in rural amhara, ethiopia. *Curr Dev Nutr* 2021;**5**:698–698.  
53 doi:10.1093/cdn/nzab045\_080  
54  
55  
56  
57  
58  
59  
60

- 1  
2  
3 33 Baye E, Abate FW, Eglovitch M, *et al.* Effect of birthweight measurement quality  
4 improvement on low birthweight prevalence in rural Ethiopia. *Popul Health Metr*  
5 2021;**19**:35. doi:10.1186/s12963-021-00265-0  
6  
7  
8 34 Members Of An Expert Consultation On Nutritious Food Supplements For  
9 Pregnant And Lactating Women. Framework and specifications for the nutritional  
10 composition of a food supplement for pregnant and lactating women (PLW) in  
11 undernourished and low income settings. *Gates Open Res* Published Online  
12 First: 2019. doi:10.21955/gatesopenres.1116379.1  
13  
14  
15 35 Institute of Medicine. Dietary Reference Intakes (DRIs): Recommended Dietary  
16 Allowances and Adequate Intakes. Washington, DC: The National Academies  
17 Press  
18  
19  
20 36 Federal Democratic Republic of Ethiopia Ministry of Health. National Guidelines  
21 for the Management of Sexually Transmitted Infections Using Syndromic. Addis  
22 Ababa, Ethiopia: 2015.  
23  
24  
25 37 World Health Organization. Soil-transmitted helminth infections.  
26 2020. [https://www.who.int/news-room/fact-sheets/detail/soil-transmitted-helminth-](https://www.who.int/news-room/fact-sheets/detail/soil-transmitted-helminth-infections)  
27 [infections](https://www.who.int/news-room/fact-sheets/detail/soil-transmitted-helminth-infections) (accessed 8 Sep2021).  
28  
29  
30 38 R Core Team. *R: A language and environment for statistical computing*. Vienna,  
31 Austria: R Foundation for Statistical Computing 2021.  
32  
33 39 Workicho A, Belachew T, Feyissa GT, *et al.* Household dietary diversity and  
34 Animal Source Food consumption in Ethiopia: evidence from the 2011 Welfare  
35 Monitoring Survey. *BMC Public Health* 2016;**16**:1192. doi:10.1186/s12889-016-  
36 3861-8  
37  
38 40 International Fetal and Newborn Growth Consortium. The International Fetal and  
39 Newborn Growth Standards for the 21st Century (INTERGROWTH-21st) Study  
40 Protocol. 2009.  
41  
42  
43 41 de Onis M, Onyango AW, Borghi E, *et al.* Comparison of the World Health  
44 Organization (WHO) Child Growth Standards and the National Center for Health  
45 Statistics/WHO international growth reference: implications for child health  
46 programmes. *Public Health Nutr* 2006;**9**:942–7. doi:10.1017/phn20062005  
47  
48  
49 42 Bloem M. The 2006 WHO child growth standards. *BMJ* 2007;**334**:705–6.  
50 doi:10.1136/bmj.39155.658843.BE  
51  
52 43 The world health report 2000 - Health systems: improving performance. Geneva,  
53 Switzerland: : World Health Organization 2000.  
54  
55  
56  
57  
58  
59  
60



- 1  
2  
3 44 Lu C, Tsai S, Ruhumuriza J, *et al.* Tracking rural health facility financial data in  
4 resource-limited settings: a case study from Rwanda. *PLoS Med*  
5 2014;**11**:e1001763. doi:10.1371/journal.pmed.1001763  
6  
7  
8 45 Tsai S, Umugiraneza G, Ruhumuriza J, *et al.* Training manual on tracking  
9 financial data in health facilities in Kayonza and Kirehe. Boston, MA: : Program in  
10 Global Health Economics and Social Change, Harvard Medical School 2013.  
11  
12 46 Lu C, Tsai S, Ruhumuriza J, *et al.* Obtaining financing data for local health  
13 facilities in two districts of Rwanda: General guidelines. Boston, MA: : Program in  
14 Global Health Economics and Social Change, Harvard Medical School 2013.  
15  
16  
17 47 West KP, Shamim AA, Mehra S, *et al.* Effect of maternal multiple micronutrient  
18 vs iron-folic acid supplementation on infant mortality and adverse birth outcomes  
19 in rural Bangladesh: the JiVitA-3 randomized trial. *JAMA* 2014;**312**:2649–58.  
20 doi:10.1001/jama.2014.16819  
21  
22  
23 48 Luntamo M, Kulmala T, Mbewe B, *et al.* Effect of repeated treatment of pregnant  
24 women with sulfadoxine-pyrimethamine and azithromycin on preterm delivery in  
25 Malawi: a randomized controlled trial. *Am J Trop Med Hyg* 2010;**83**:1212–20.  
26 doi:10.4269/ajtmh.2010.10-0264  
27  
28  
29 49 Luntamo M, Kulmala T, Cheung YB, *et al.* The effect of antenatal monthly  
30 sulphadoxine-pyrimethamine, alone or with azithromycin, on foetal and neonatal  
31 growth faltering in Malawi: a randomised controlled trial. *Trop Med Int Health*  
32 2013;**18**:386–97. doi:10.1111/tmi.12074  
33  
34  
35  
36  
37  
38  
39  
40  
41  
42  
43  
44  
45  
46  
47  
48  
49  
50  
51  
52  
53  
54  
55  
56  
57  
58  
59  
60
